# Supplementary material for: New supramolecules of bis(acylhydrazones)-linked bisphenol sulfide for Alzheimer's: targeting cholinesterases by in vitro and in silico approaches
Source: Royal Society of Chemistry journal article supplement (doi:10.1039/d3ra03908k), 2023-01-01
Supplement: d3ra03908k1.pdf [file d3ra03908k1.pdf]

Supporting informations data

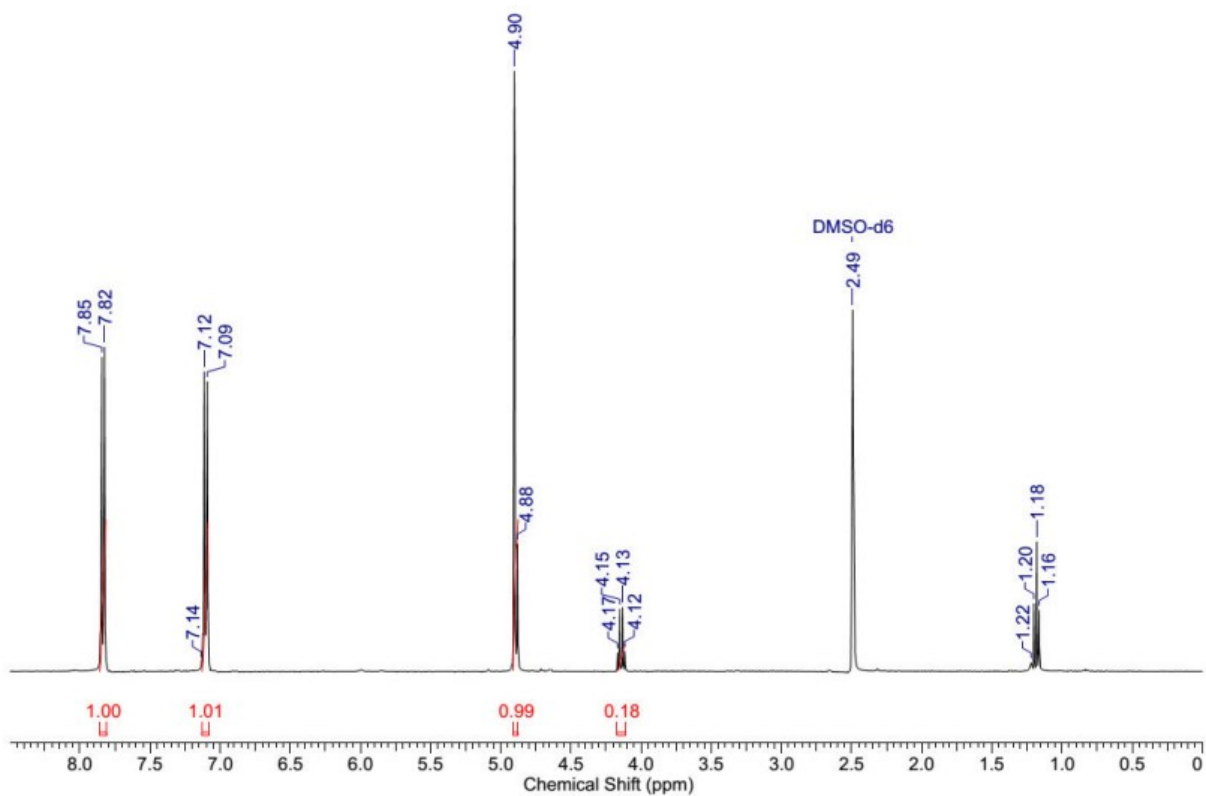

Figure S1:  $^1\text{H}$  NMR OF COMPOUND SM2

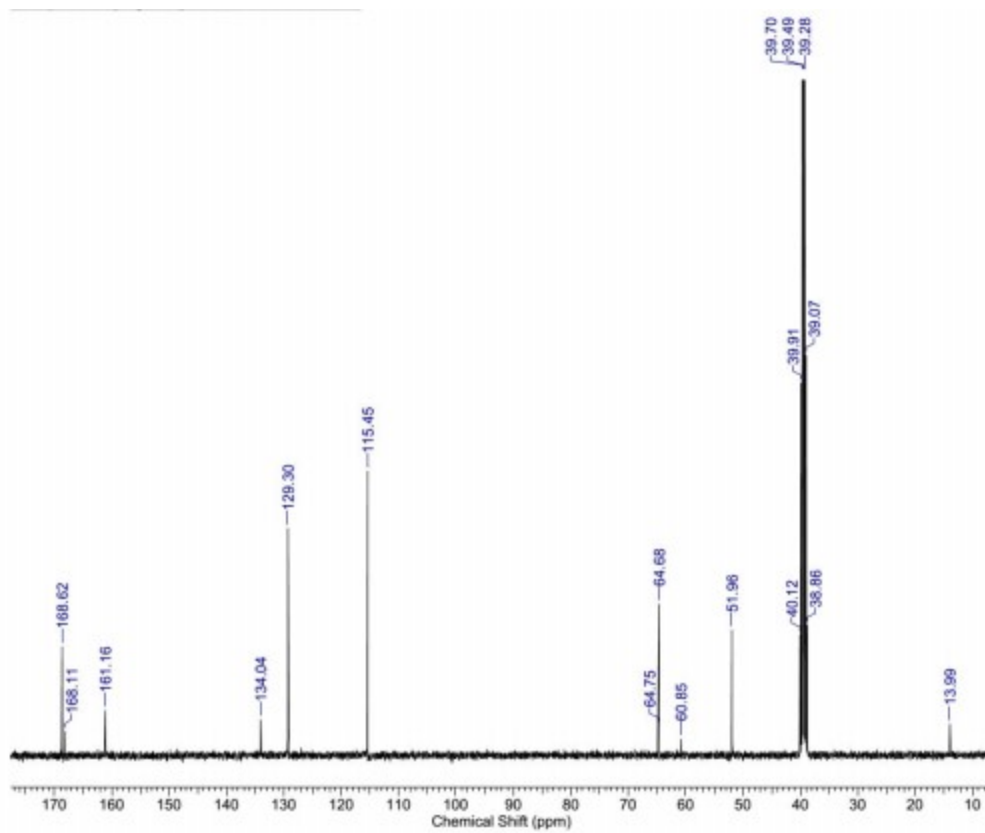

Figure S2: <sup>13</sup>C NMR OF COMPOUND SM2

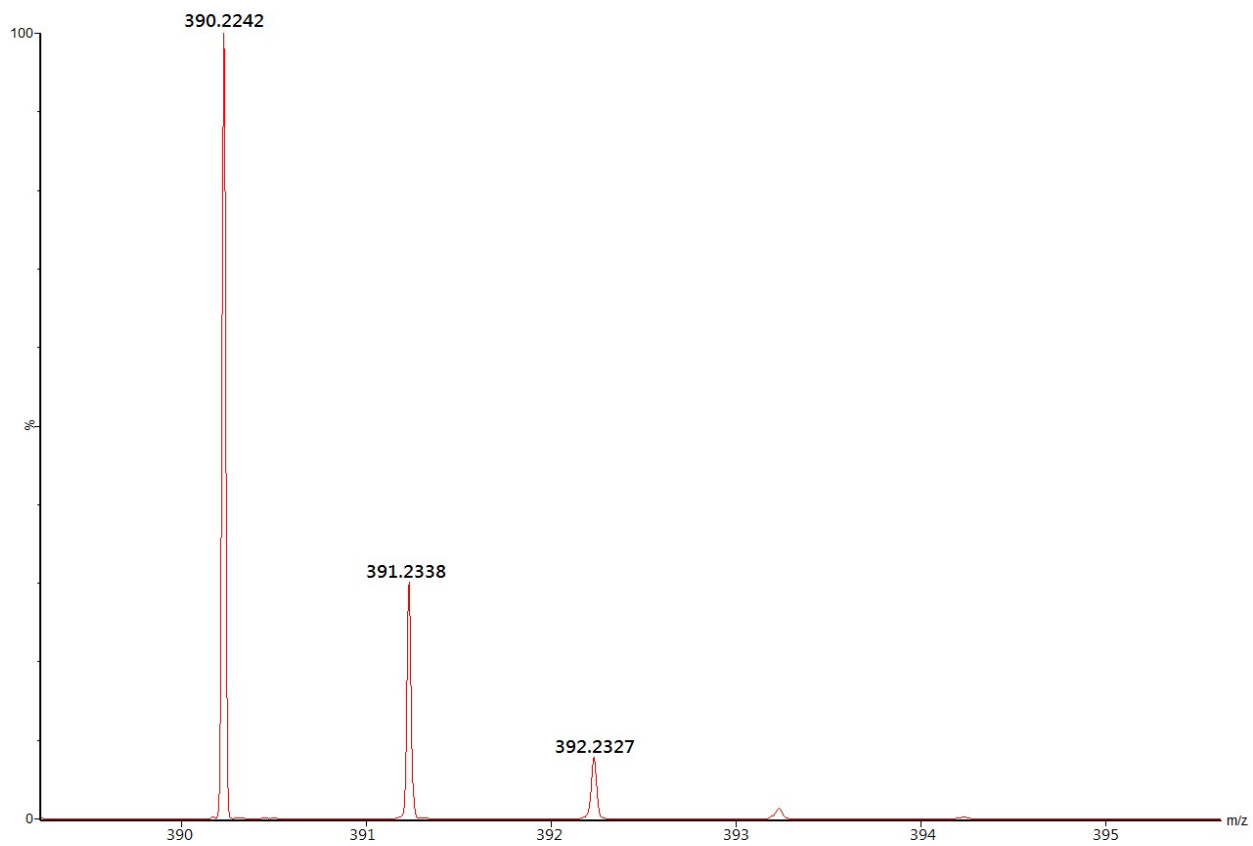

Figure S3: HR-MS OF COMPOUND SM2

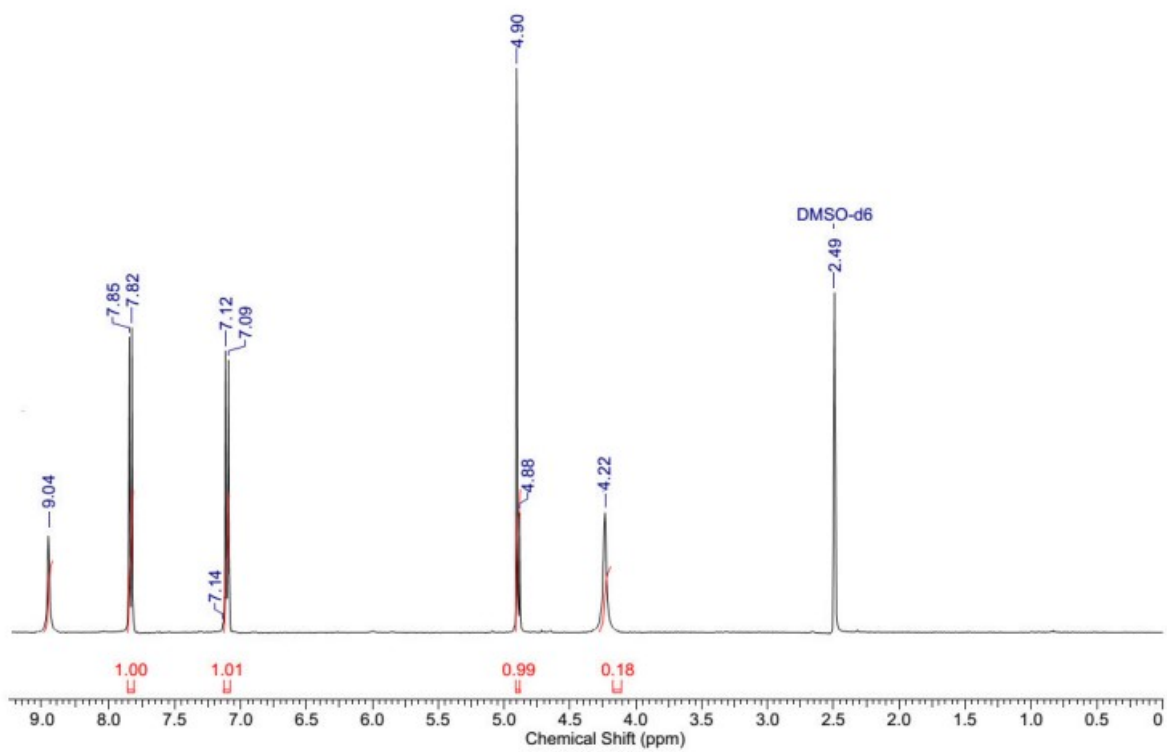

Figure S4:  $^1\text{H}$  NMR OF COMPOUND SM3

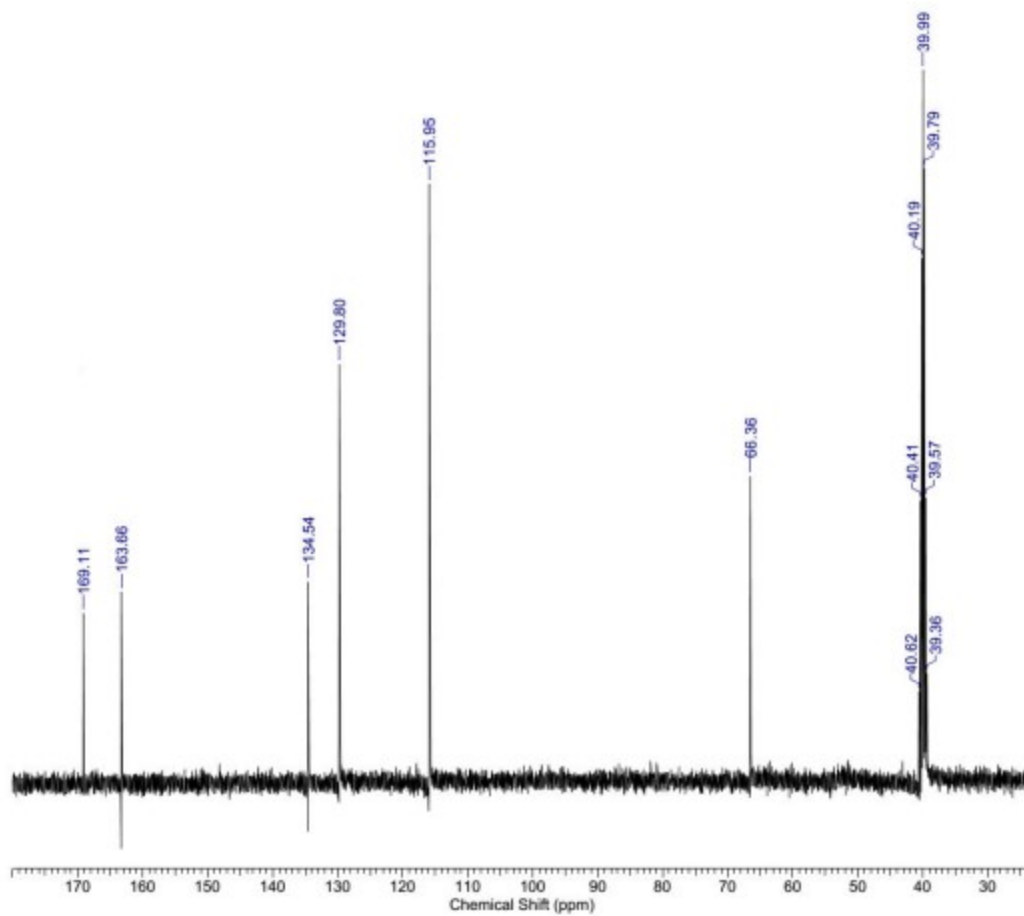

Figure S5: <sup>13</sup>C NMR OF COMPOUND SM3

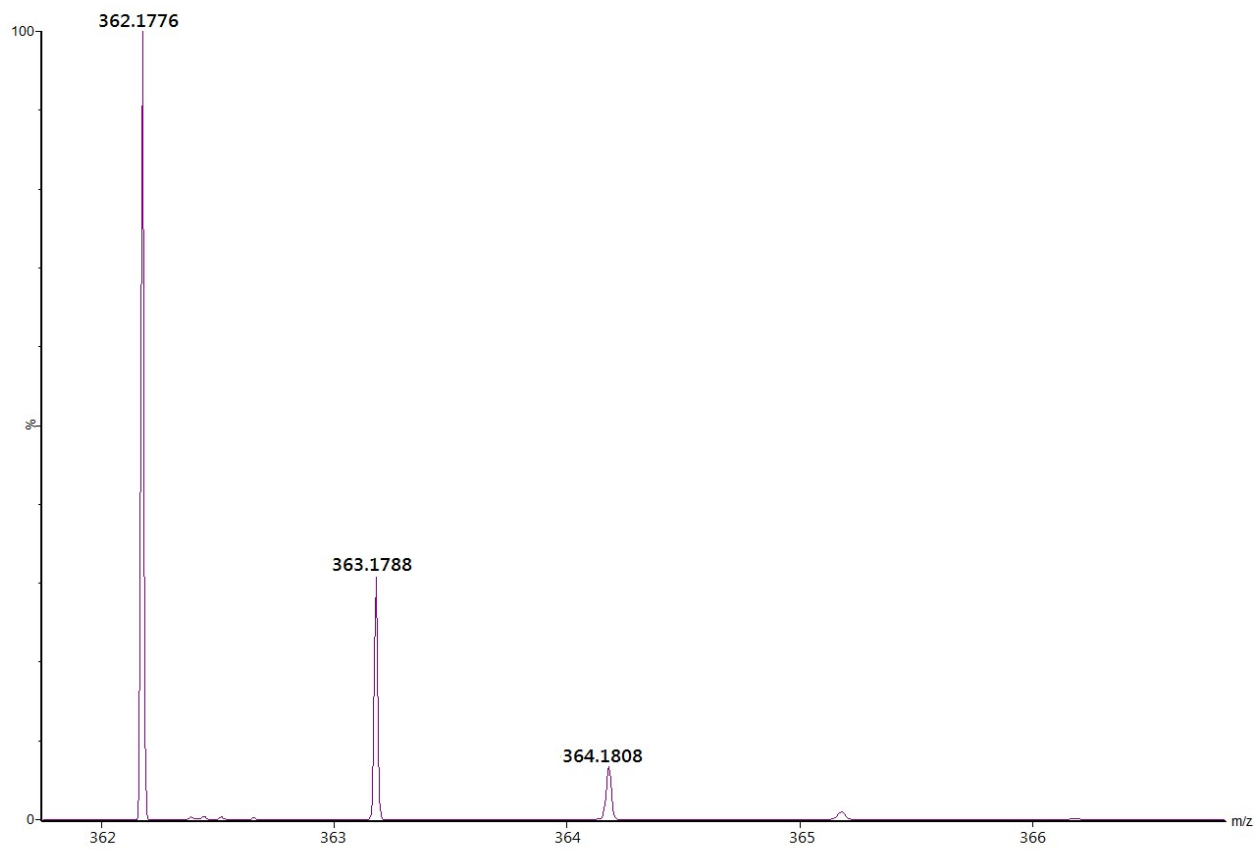

Figure S6: HR-MS OF COMPOUND SM3

Dr. Ajmal/Prof. Ahmed/M1M01/DMSO  
PROTON

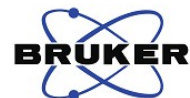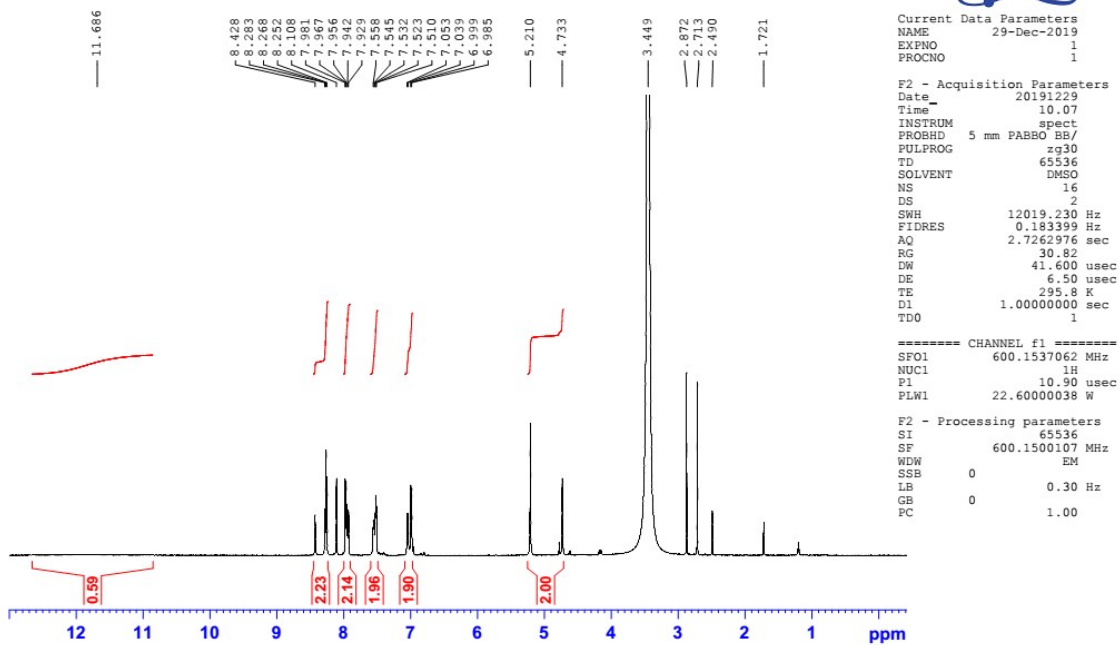

Figure S7:  $^1\text{H}$  NMR OF COMPOUND 4a

Dr. Ajmal / MIM01 / DMSO  
C13CPD

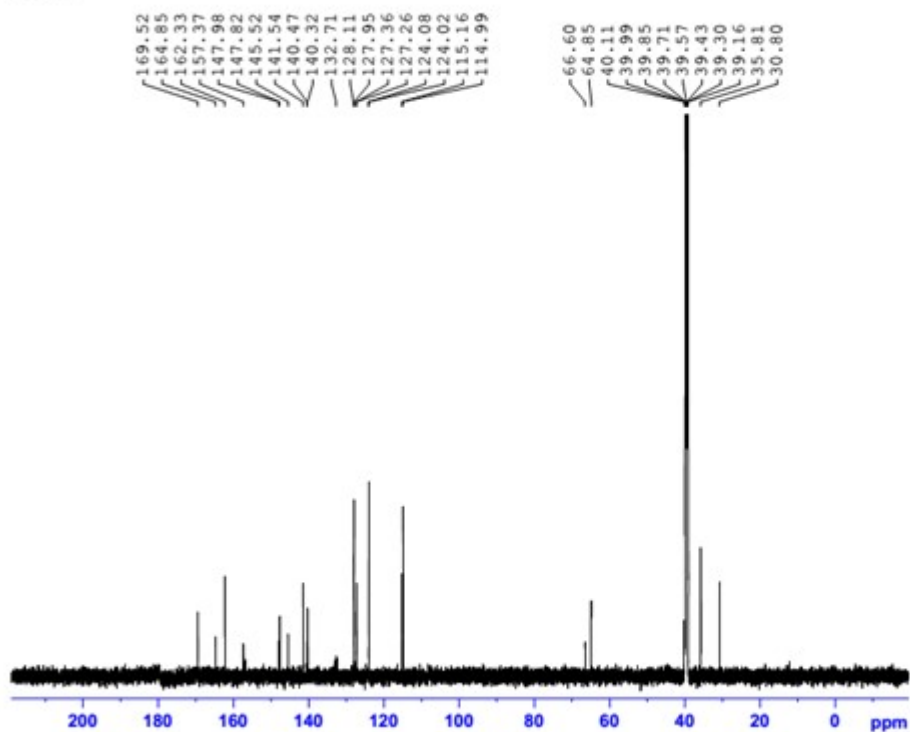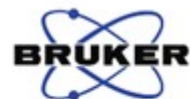

Current Data Parameters  
NAME 25-Jan-2021  
EXPNO 20  
PROCNO 1

F2 - Acquisition Parameters  
Date\_ 20210123  
Time 22.23  
INSTRUM spect  
PROBHD 5 mm DSSBO 1H/1  
PULPROG zgpg30  
TD 65536  
SOLVENT DMSO  
NS 2048  
DS 4  
SWH 36057.691 Hz  
FIDRES 0.550197 Hz  
AQ 0.5087659 sec  
RG 155.2  
DM 13.947 usec  
DE 6.30 usec  
TE 294.6 K  
D1 2.0000000 sec  
D11 0.0300000 sec  
TD0 1

----- CHANNEL f1 -----  
SFO1 150.9229276 MHz  
MDC1 13C  
P1 11.40 usec  
PLW1 83.0000000 W

----- CHANNEL f2 -----  
SFO2 400.1524006 MHz  
MDC2 1H  
CPCPRG2 waltz16  
PCPD2 70.00 usec  
PLW2 22.6000000 W  
PLW3 0.5280400 W  
PLW3 0.25874999 W

F2 - Processing parameters  
SI 32768  
SF 150.9079041 MHz  
WDW EM  
SSB 0  
LB 1.00 Hz  
GB 0  
PC 1.40

Figure S8: <sup>13</sup>C NMR OF COMPOUND 4a



|                    |                     |                               |         |                        |                      |
|--------------------|---------------------|-------------------------------|---------|------------------------|----------------------|
| <b>Sample Name</b> | MIM-01              | <b>Position</b>               | Vial 31 | <b>Instrument Name</b> | Instrument 1         |
| <b>User Name</b>   |                     | <b>Inj Vol</b>                | 10      | <b>InjPosition</b>     |                      |
| <b>Sample Type</b> | Sample              | <b>IRM Calibration Status</b> | Success | <b>Data Filename</b>   | MIM-01_NEG_01.d      |
| <b>ACQ Method</b>  | NEG ION METHOD MS.m | <b>Comment</b>                |         | <b>Acquired Time</b>   | 10-Mar-20 3:24:47 PM |

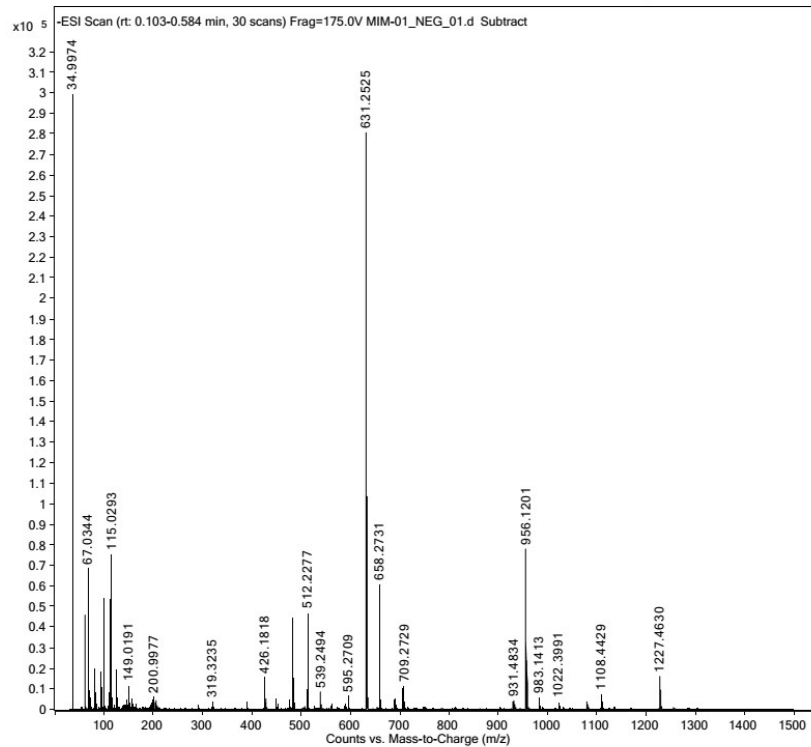

Figure S9: HR-MS OF COMPOUND 3a

Dr. Ajmal/Prof. Ahmed/M1M02/DMSO  
PROTON

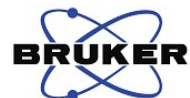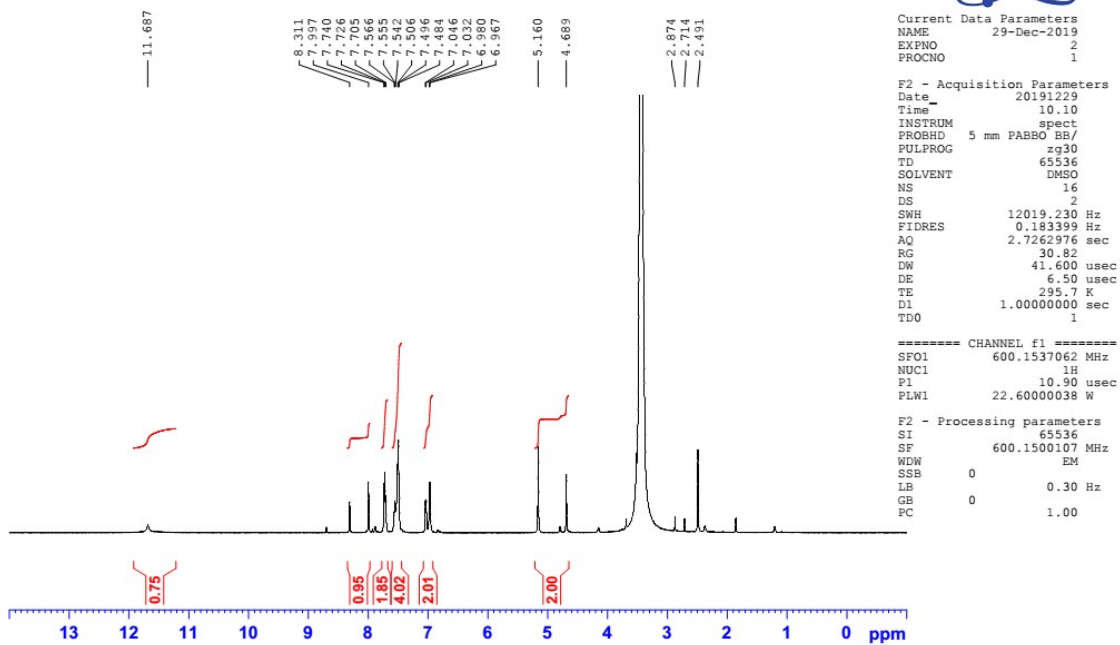

Figure S10: <sup>1</sup>H NMR of compound 4b

Dr. Ajmal / MIM02 / DMSO  
C13CPD

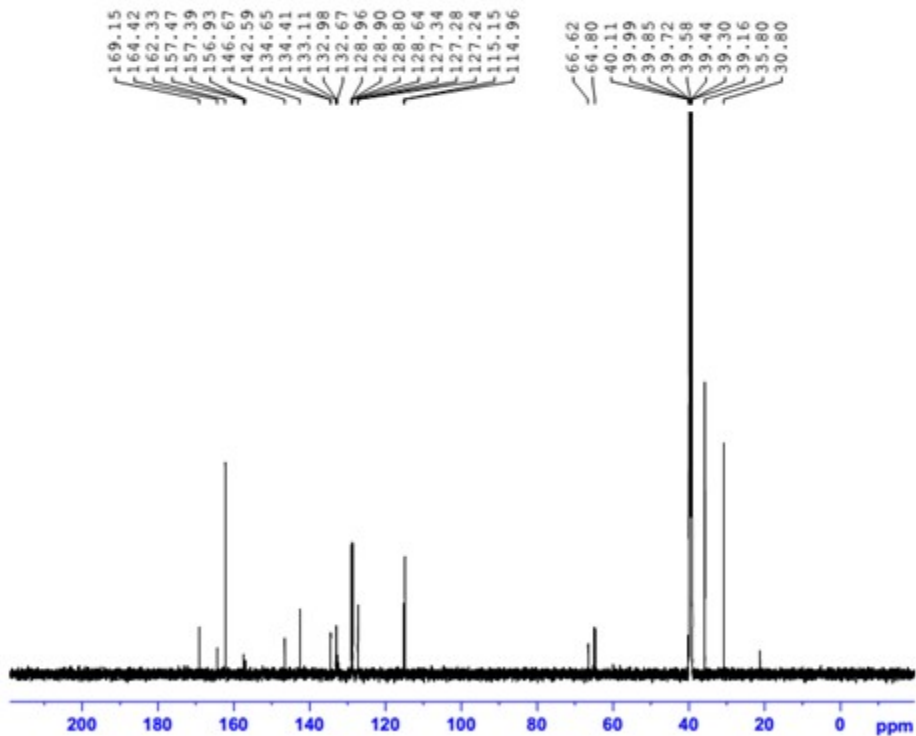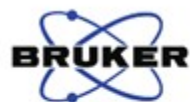

Current Data Parameters  
NAME 23-Jun-2021  
EXPRNO 24  
PROCNO 1

F2 - Acquisition Parameters  
Date\_ 2810126  
Time 2.48  
INSTRUM spect  
PROBHD 5 mm PABBO 50/  
PULPROG zgpg30  
TD 65536  
SOLVENT DMSO  
NS 2048  
DS 4  
SWH 3657.692 Hz  
FIDRES 0.580197 Hz  
AQ 0.5087659 sec  
RG 193.2  
WE 11.847 usec  
DE 4.50 usec  
TE 296.2 K  
D1 2.0000000 sec  
D11 0.0100000 sec  
TD 1

===== CHANNEL f1 =====  
SFO1 150.921276 MHz  
NUC1 13C  
P1 11.40 usec  
PLW1 83.0000000 W

===== CHANNEL f2 =====  
SFO2 600.1324006 MHz  
NUC2 1H  
CFOFPG2 waltz16  
PCPD2 70.00 usec  
PLW2 22.6000000 W  
PLW3 0.5200000 W  
PLW4 0.25874999 W

F2 - Processing parameters  
SI 32768  
SF 150.9079041 MHz  
WDW EM  
SSB 0  
LA 1.00 Hz  
GB 0  
PC 1.40

Figure S11:  $^{13}\text{C}$  NMR OF COMPOUND 4b

|                    |                     |                               |         |                        |                      |
|--------------------|---------------------|-------------------------------|---------|------------------------|----------------------|
| <b>Sample Name</b> | MIM-02              | <b>Position</b>               | Vial 32 | <b>Instrument Name</b> | Instrument 1         |
| <b>User Name</b>   |                     | <b>Inj Vol</b>                | 10      | <b>InjPosition</b>     |                      |
| <b>Sample Type</b> | Sample              | <b>IRM Calibration Status</b> | Success | <b>Data Filename</b>   | MIM-02_NEG_01.d      |
| <b>ACQ Method</b>  | NEG ION METHOD MS.m | <b>Comment</b>                |         | <b>Acquired Time</b>   | 10-Mar-20 3:31:54 PM |

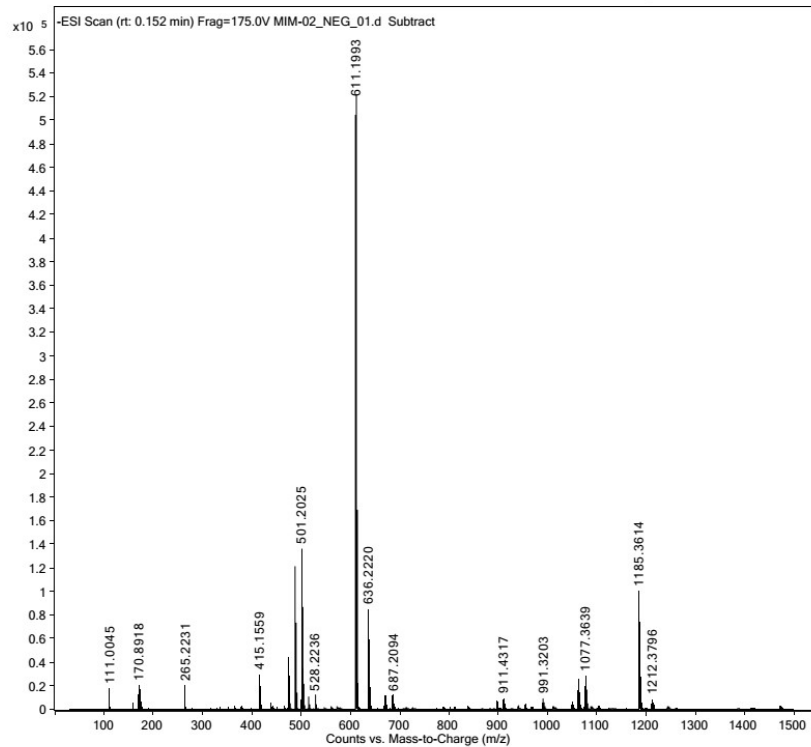

Figure S12: HR-MS OF COMPOUND 4b

Dr. Ajmal/Prof. Ahmed/M1M03/DMSO  
PROTON

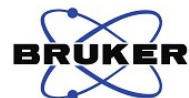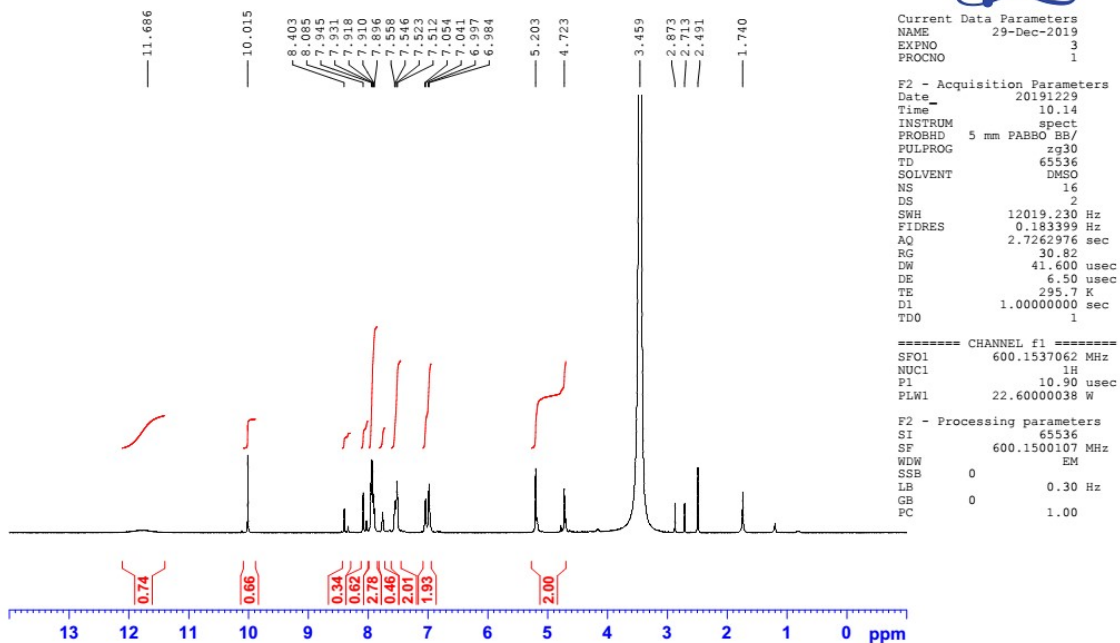

Figure S13:  $^1\text{H}$  NMR OF COMPOUND 4c

Dr. Ajmal / MIM03 / DMSO  
C13CPD

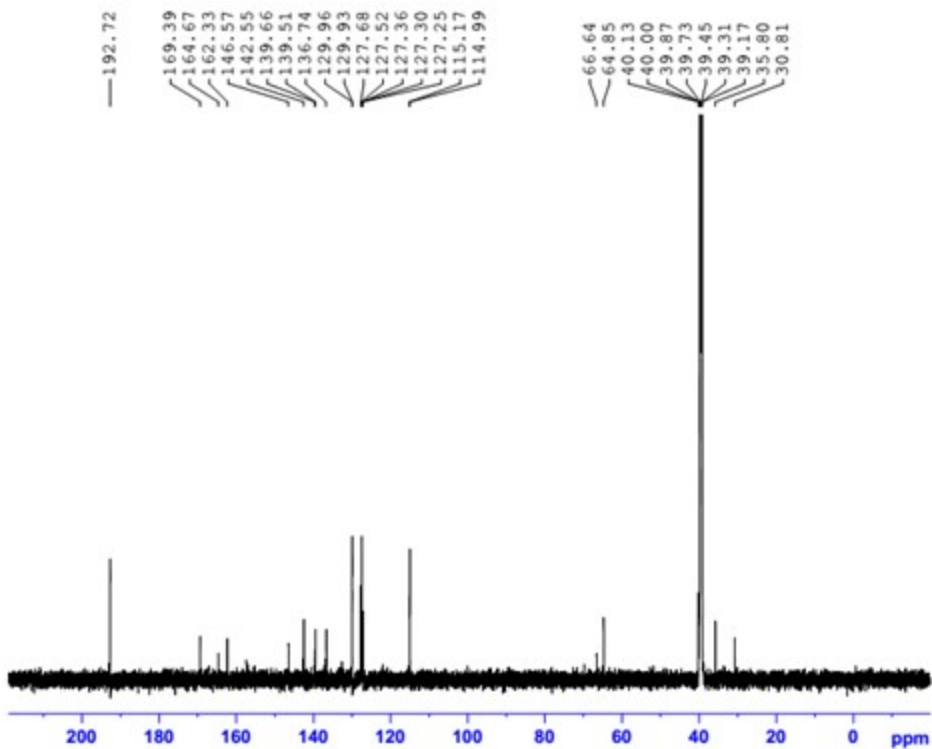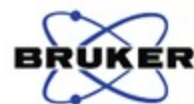

```
Current Data Parameters
NAME      28-Jan-2021
EXPRO     2
PROCNO    1

F2 - Acquisition Parameters
Date_     20210128
Time      22.46
INSTRUM   spect
PROBHD    5 mm VASBO 5B7
PULPROG   zgpg30
TD         65536
SOLVENT   DMSO
NS         4096
DS         4
SWH        36057.691 Hz
FIDRES     0.550197 Hz
AQ         0.9087659 sec
RG         195.2
CW         11.567 usec
DE         6.50 usec
TE         296.4 K
D1         2.0000000 sec
d11        0.0300000 sec
TD0        1

----- CHANNEL f1 -----
SFO1      150.9229276 MHz
NUC1       13C
P1         11.60 usec
PLW1       83.0000000 W

----- CHANNEL f2 -----
SFO2      600.1524004 MHz
NUC2       1H
CPCPRG2   waltz16
PCPD2     70.00 usec
PLW2      22.6000000 W
PLW3      0.5280600 W
PLW4      0.25874999 W

F2 - Processing parameters
SI         32768
SF         150.9079041 MHz
WDW        EM
SSB        0
LB         1.00 Hz
GB         0
PC         1.40
```

Figure S14: <sup>13</sup>C NMR OF COMPOUND 4c

|                    |                     |                               |         |                        |                      |
|--------------------|---------------------|-------------------------------|---------|------------------------|----------------------|
| <b>Sample Name</b> | MIM-03              | <b>Position</b>               | Vial 33 | <b>Instrument Name</b> | Instrument 1         |
| <b>User Name</b>   |                     | <b>Inj Vol</b>                | 10      | <b>InjPosition</b>     |                      |
| <b>Sample Type</b> | Sample              | <b>IRM Calibration Status</b> | Success | <b>Data Filename</b>   | MIM-03_NEG_01.d      |
| <b>ACQ Method</b>  | NEG ION METHOD MS.m | <b>Comment</b>                |         | <b>Acquired Time</b>   | 10-Mar-20 3:39:01 PM |

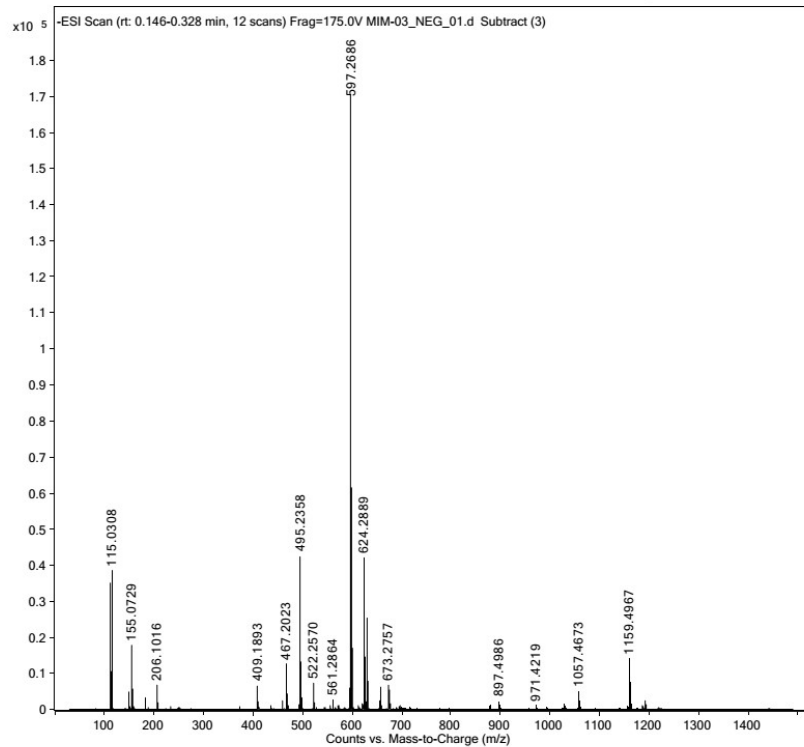

Figure S15: HR-MS OF COMPOUND 4c

Dr. Ajmal/Prof. Ahmed/M1M-04/DMSO  
PROTON

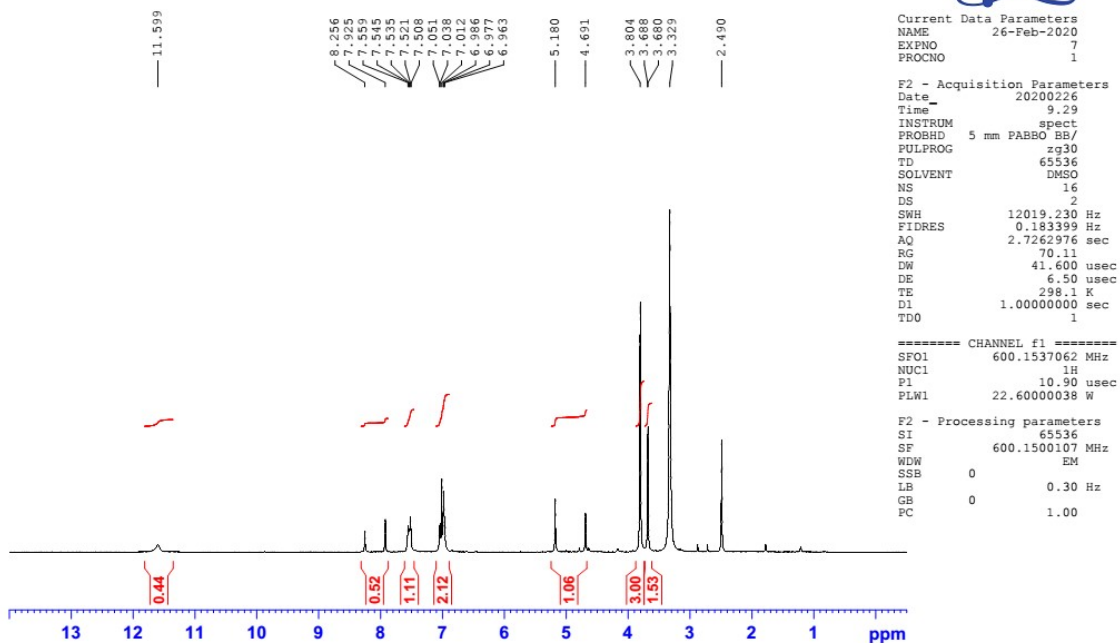

Figure S16:  $^1\text{H}$  NMR OF COMPOUND 4d



Dr. Ajmal / MIM04 / DMSO  
C13CPD

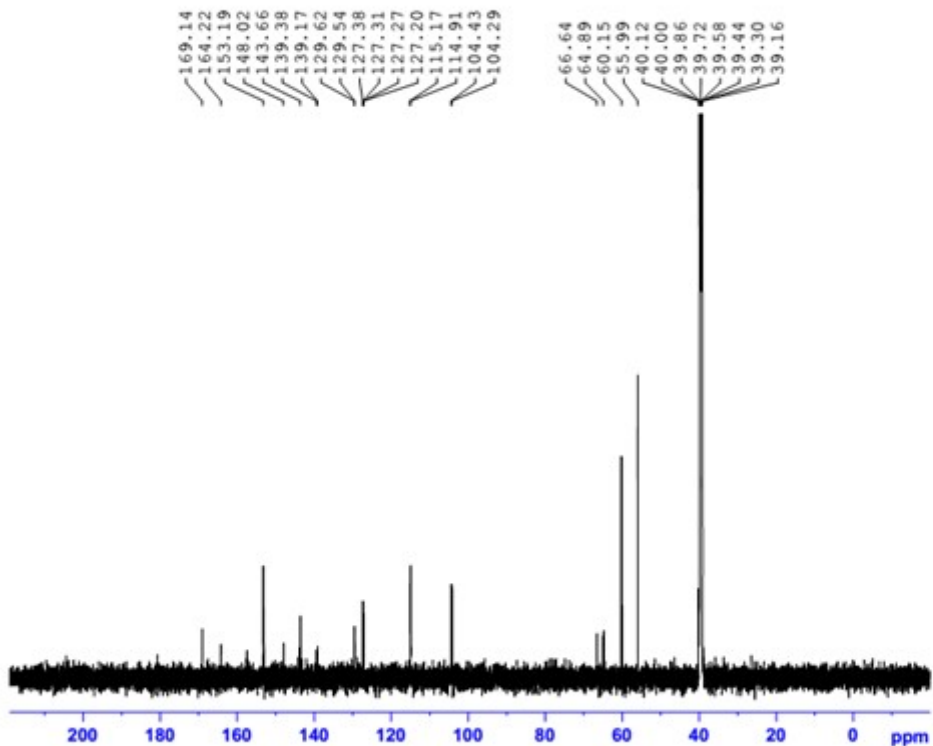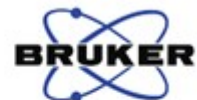

```
Current Data Parameters
NAME      28-Jan-2021
EXPNO    4
PROCNO   1

F2 - Acquisition Parameters
Date_    20210129
Time     4.20
INSTRUM  spect
PROBHD   5 mm BBOBO 1H/
PULPROG  zgpg30
TD        65536
SOLVENT  DMSO
NS        2048
DS        4
SWH       34057.475 Hz
FIDRES    0.592197 Hz
AQ        0.9087659 sec
RG         195.2
DW        13.947 usec
DE         4.50 usec
TE        296.4 K
D1        2.0000000 sec
D11       0.0300000 sec
TD0       1

===== CHANNEL f1 =====
SFO1     150.921776 MHz
MPC1     13C
P1        11.40 usec
PLA1     83.00000000 W

===== CHANNEL f2 =====
SFO2     400.1524006 MHz
MPC2     1H
CPDPRG2  waltz16
PCPD2    70.00 usec
PLA2     22.40000038 W
PLA22    0.52404002 W
PLA23    0.25874999 W

F2 - Processing parameters
SI        32768
SF        150.9079041 MHz
WDW       EM
SSB       0
LB        1.00 Hz
GB        0
PC        1.40
```

Figure S17:  $^{13}\text{C}$  NMR OF COMPOUND 4d

|                    |                     |                               |         |                        |                      |
|--------------------|---------------------|-------------------------------|---------|------------------------|----------------------|
| <b>Sample Name</b> | MIM-04              | <b>Position</b>               | Vial 34 | <b>Instrument Name</b> | Instrument 1         |
| <b>User Name</b>   |                     | <b>Inj Vol</b>                | 10      | <b>InjPosition</b>     |                      |
| <b>Sample Type</b> | Sample              | <b>IRM Calibration Status</b> | Success | <b>Data Filename</b>   | MIM-04_NEG_01.d      |
| <b>ACQ Method</b>  | NEG ION METHOD MS.m | <b>Comment</b>                |         | <b>Acquired Time</b>   | 10-Mar-20 3:46:08 PM |

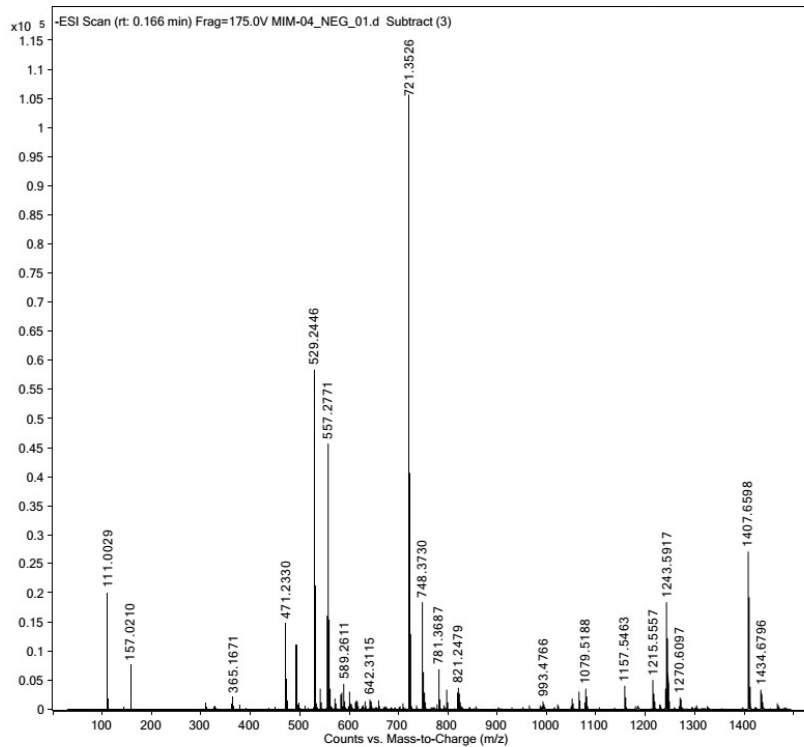

Figure S18: HR-MS OF COMPOUND 4d

Dr. Ajmal/Prof. Ahmed/M1M-05/DMSO  
PROTON

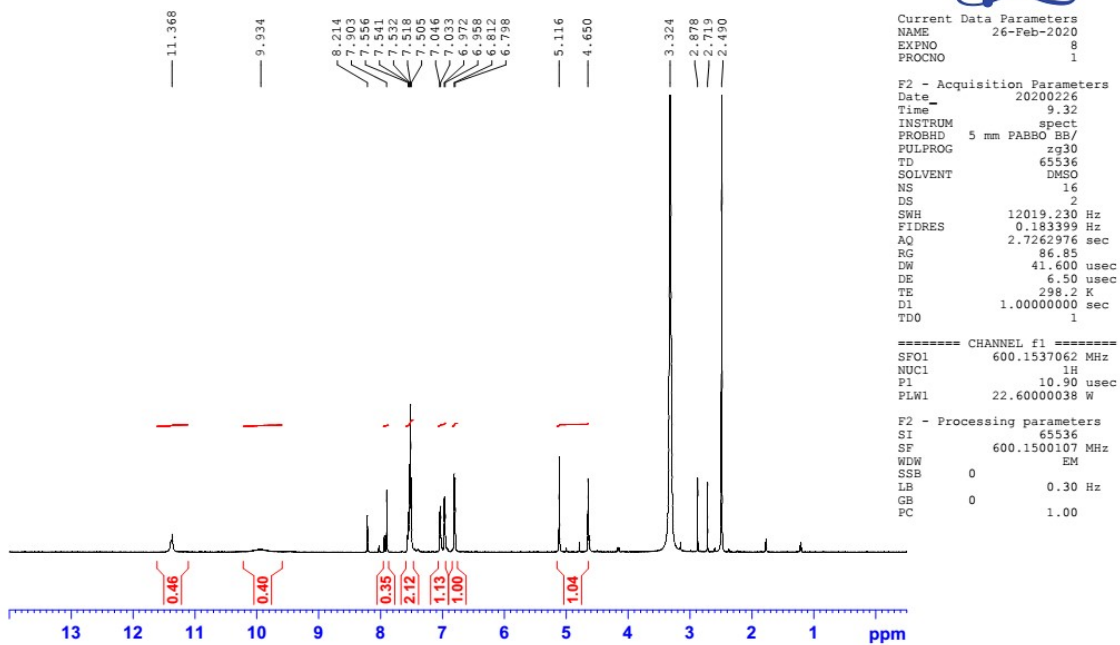

Figure S19:  $^1\text{H}$  NMR OF COMPOUND 4e

Dr. Ajmal / MIM05 / DMSO  
C13CPD

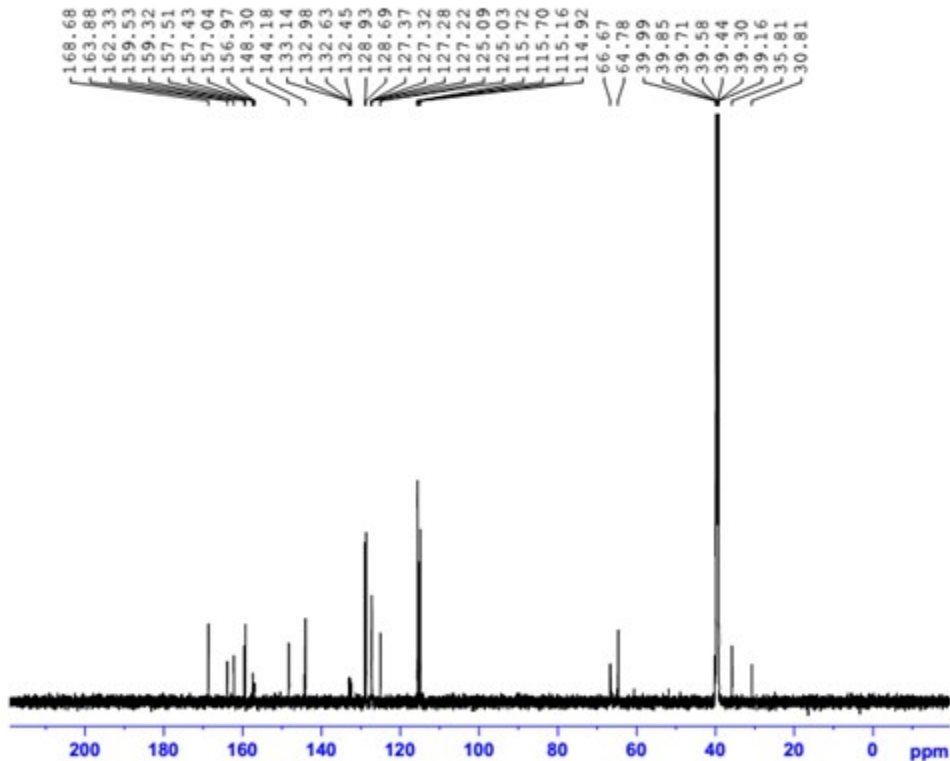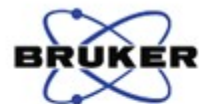

Current Data Parameters  
NAME 25-Jan-2021  
EXPNO 28  
PROCNO 1

F2 - Acquisition Parameters  
Date\_ 20210126  
Time 6.24  
INSTROM spect  
PROBHD 5 mm BBOBO 507  
PULPROG zgpg30  
TD 65536  
SOLVENT dmsd  
NS 2048  
DS 4  
SWH 34057.491 Hz  
FIDRES 0.550197 Hz  
AQ 0.9097459 sec  
RG 195.2  
DM 13.867 usec  
DE 6.50 usec  
TE 296.2 K  
D1 2.0000000 sec  
D11 0.0300000 sec  
TUD 1

\*\*\*\*\* CHANNEL f1 \*\*\*\*\*  
SFO1 150.9229274 MHz  
NUC1 13C  
P1 11.60 usec  
PLW1 83.0000000 W

\*\*\*\*\* CHANNEL f2 \*\*\*\*\*  
SFO2 600.1524006 MHz  
NUC2 1H  
PCPORG2 waix16  
PCPD2 30.00 usec  
PLW2 22.6000000 W  
PLW3 0.52804002 W  
PLW4 0.25874999 W

F2 - Processing parameters  
SI 32768  
SF 150.9079041 MHz  
WDW EM  
SSB 0  
LB 1.00 Hz  
GB 0  
PC 1.40

Figure S20: <sup>13</sup>C NMR OF COMPOUND 4e

|                    |                     |                               |         |                        |                      |
|--------------------|---------------------|-------------------------------|---------|------------------------|----------------------|
| <b>Sample Name</b> | MIM-05              | <b>Position</b>               | Vial 35 | <b>Instrument Name</b> | Instrument 1         |
| <b>User Name</b>   |                     | <b>Inj Vol</b>                | 10      | <b>InjPosition</b>     |                      |
| <b>Sample Type</b> | Sample              | <b>IRM Calibration Status</b> | Success | <b>Data Filename</b>   | MIM-05_NEG_01.d      |
| <b>ACQ Method</b>  | NEG ION METHOD MS.m | <b>Comment</b>                |         | <b>Acquired Time</b>   | 10-Mar-20 3:53:16 PM |

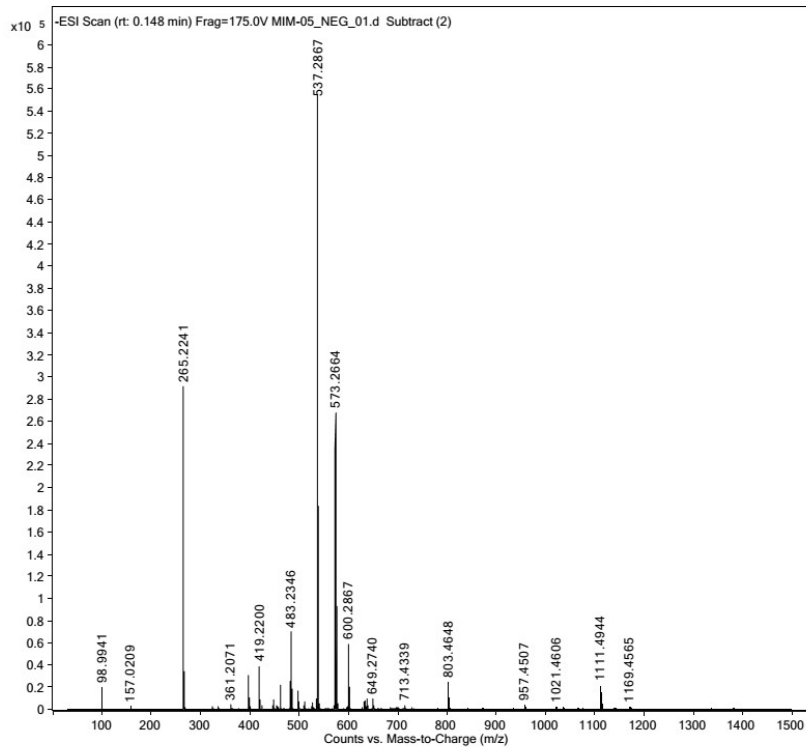

Figure S21: HR-MS OF COMPOUND 4e

Dr. Ajmal/Prof. Ahmed/M1M-06/DMSO  
PROTON

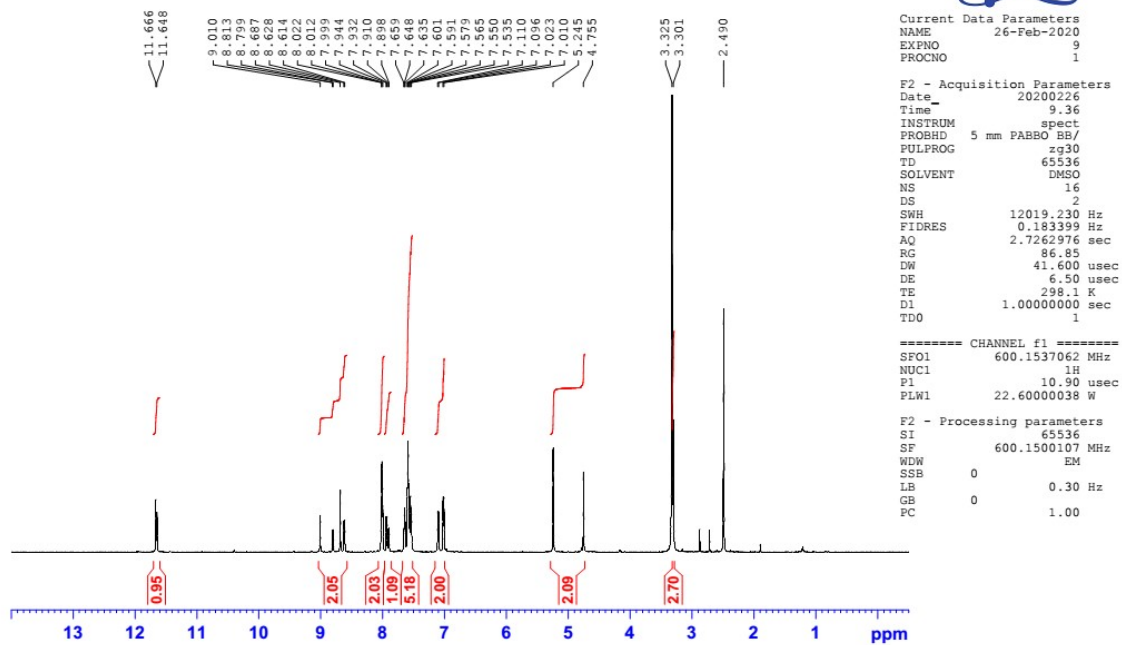

Figure S22: <sup>1</sup>H NMR OF COMPOUND 4f

Dr. Ajmal / MIM06 / DMSO  
C13CPD

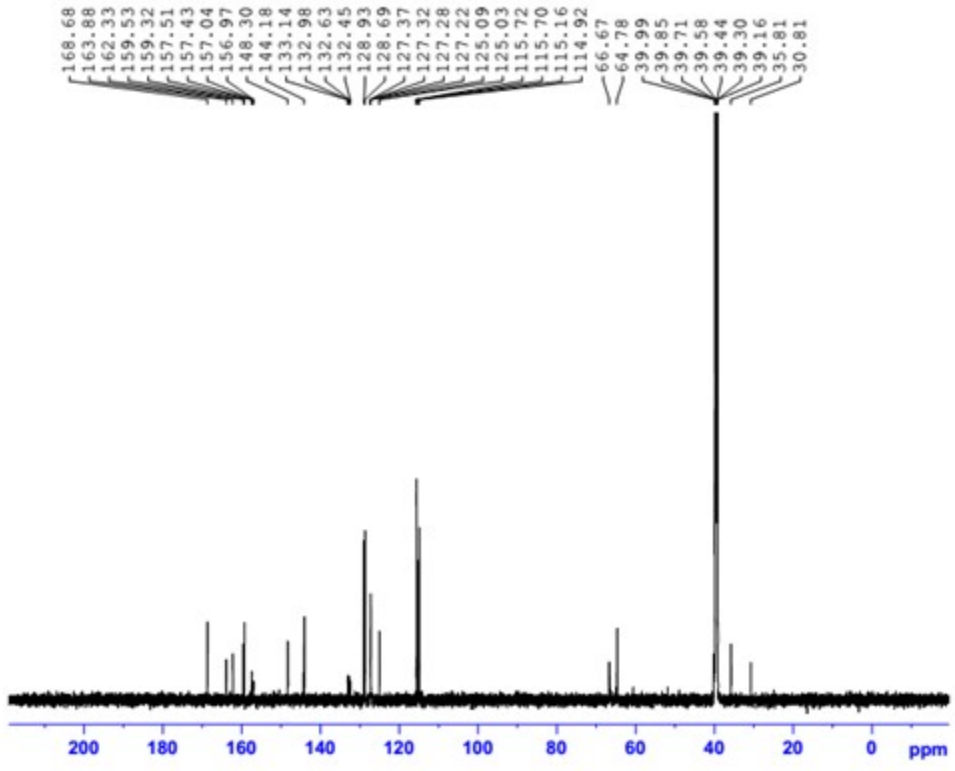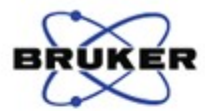

Current Data Parameters  
NAME 25-Jan-2021  
EXPRO 28  
PROCNO 1

F2 - Acquisition Parameters  
Date\_ 20210126  
Time 6.24  
INSTRUM spect  
PROBHD 5 mm PABBO BB  
PULPROG zgpg30  
TD 65536  
SOLVENT DMSO  
NS 2048  
DS 4  
SWH 36057.691 Hz  
FIDRES 0.550197 Hz  
AQ 0.9087450 sec  
RG 195.2  
DW 13.987 usec  
DE 6.50 usec  
TE 296.2 K  
D1 2.0000000 sec  
D11 0.3300000 sec  
TD0 1

----- CHANNEL f1 -----  
SFO1 150.9229276 MHz  
NUC1 13C  
P1 11.60 usec  
PL1 83.0000000 W

----- CHANNEL f2 -----  
SFO2 400.1524004 MHz  
NUC2 1H  
CPCORR2 wait14  
PCPD 70.00 usec  
PLM2 22.6000000 W  
PLM1 0.3280600 W  
PLM3 0.35874999 W

F2 - Processing parameters  
S1 32768  
SF 150.9079041 MHz  
WDW EM  
SSB 0  
LB 1.00 Hz  
GB 0  
PC 1.40

Figure S23: <sup>13</sup>C NMR OF COMPOUND 4f

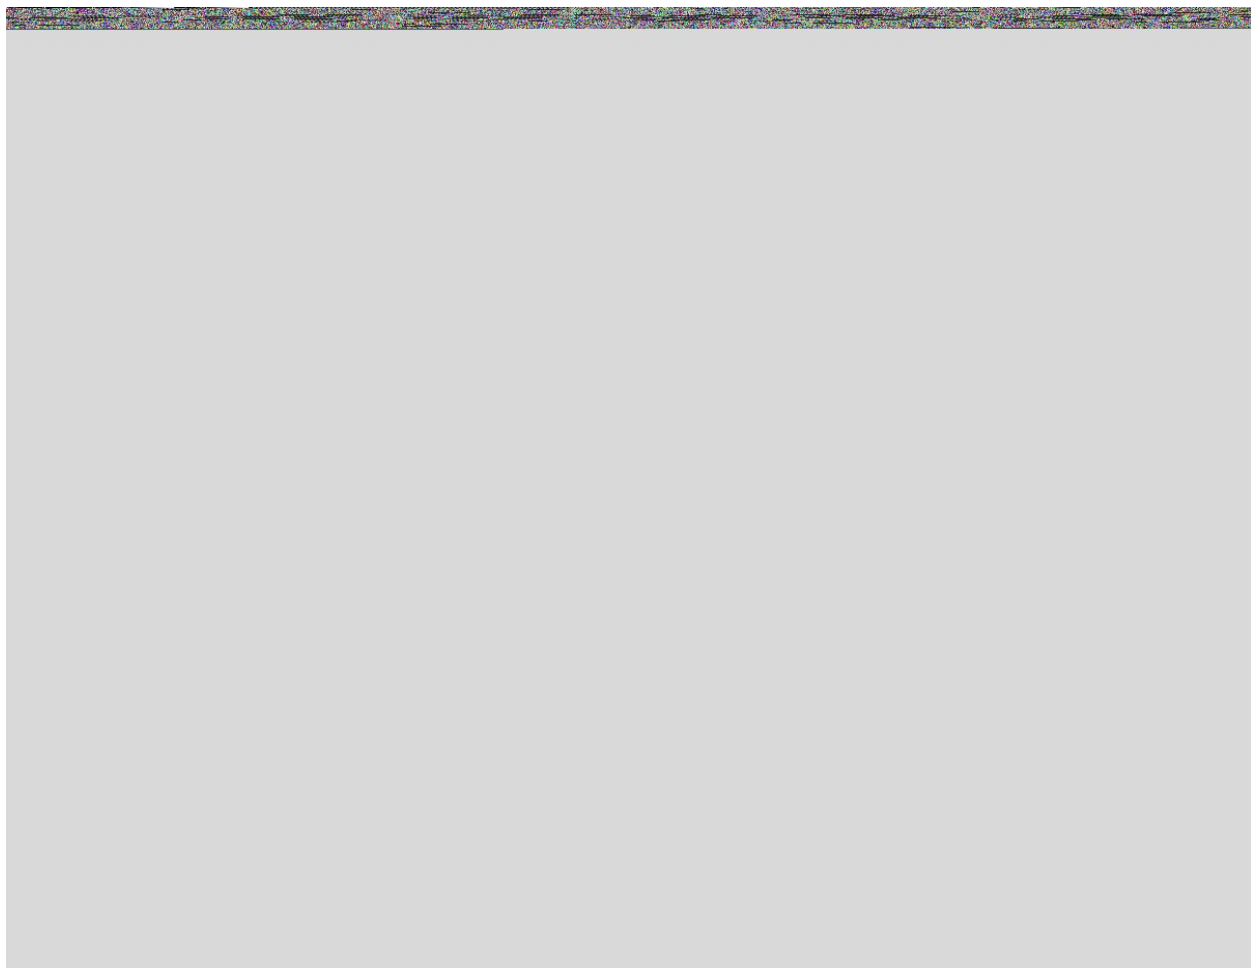

Figure S24: HR-MS OF COMPOUND 4f



Dr. Ajmal/Prof. Ahmed/M1M-07/DMSO  
PROTON

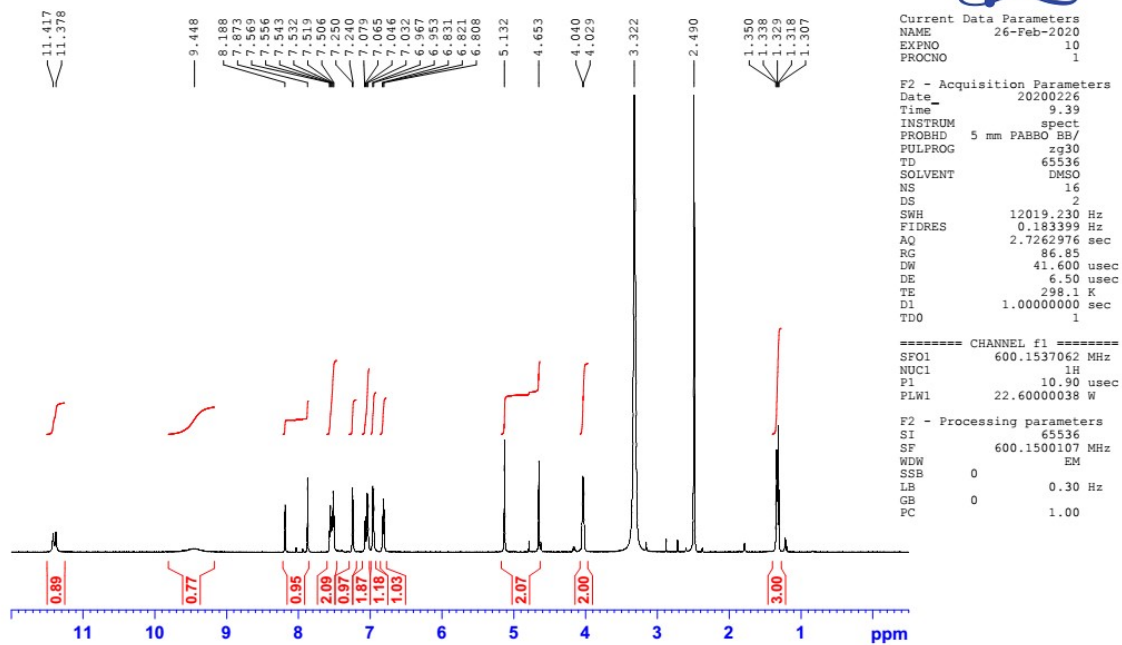

Figure S25:  $^1\text{H}$  NMR OF COMPOUND 4g

Dr. Ajmal / MIM07 / DMSO  
C13CPD

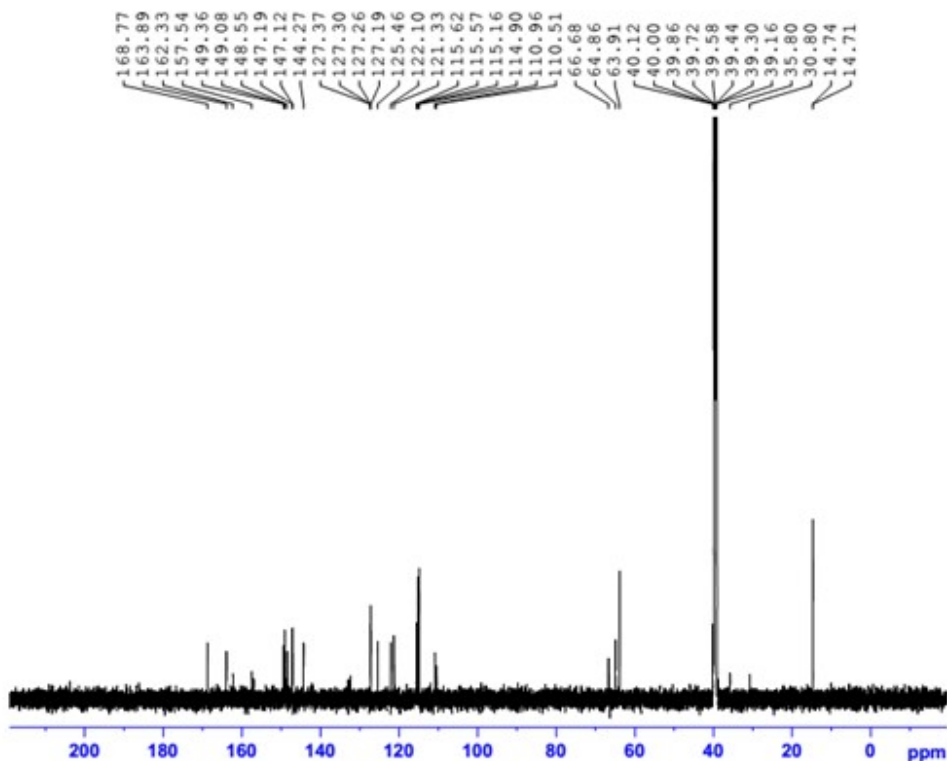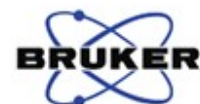

```
Current Data Parameters
NAME      28-Jan-2021
EXNO      26
PROCNO    1

F2 - Acquisition Parameters
Date_     20210130
Time      1.56
INSTRUM   spect
PROBHD    5 mm PABBO BB/
PULPROG   zgpg30
TD         65534
SOLVENT   DMSO
NS         2048
DS         4
SWH        36057.691 Hz
FIDRES     0.550197 Hz
AQ         0.9087659 sec
RG         199.2
DM         13.867 usec
DE         6.50 usec
TE         296.4 K
D1         2.00000000 sec
D11        0.03000000 sec
TD0        1

===== CHANNEL f1 =====
SFO1      150.9229276 MHz
MPC1      13C
PI         11.40 usec
PLM1      83.00000000 W

===== CHANNEL f2 =====
SFO2      600.1524006 MHz
MPC2      1H
CPCPRG2   waltz16
PCPD2     70.00 usec
PLM2      22.60000038 W
PLM12     0.82806002 W
PLM13     0.25874999 W

F2 - Processing parameters
SI         32768
SF         150.9079041 MHz
MSW        6M
SSB        0
LB         1.00 Hz
GB         0
PC         1.40
```

Figure S26: <sup>13</sup>C NMR OF COMPOUND 4g

|                    |                     |                               |         |                        |                      |
|--------------------|---------------------|-------------------------------|---------|------------------------|----------------------|
| <b>Sample Name</b> | MIM-07              | <b>Position</b>               | Vial 37 | <b>Instrument Name</b> | Instrument 1         |
| <b>User Name</b>   |                     | <b>Inj Vol</b>                | 10      | <b>InjPosition</b>     |                      |
| <b>Sample Type</b> | Sample              | <b>IRM Calibration Status</b> | Success | <b>Data Filename</b>   | MIM-07_NEG_01.d      |
| <b>ACQ Method</b>  | NEG ION METHOD MS.m | <b>Comment</b>                |         | <b>Acquired Time</b>   | 10-Mar-20 4:07:30 PM |

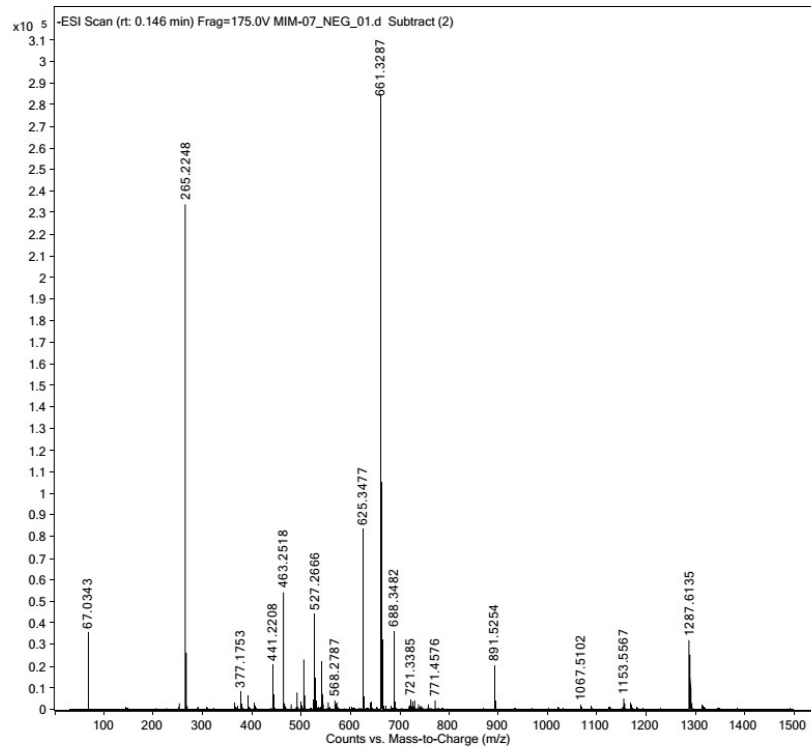

Figure S27: HR-MS OF COMPOUND 4g

Dr. Ajmal/Prof. Ahmed/M1M-08/DMSO  
PROTON

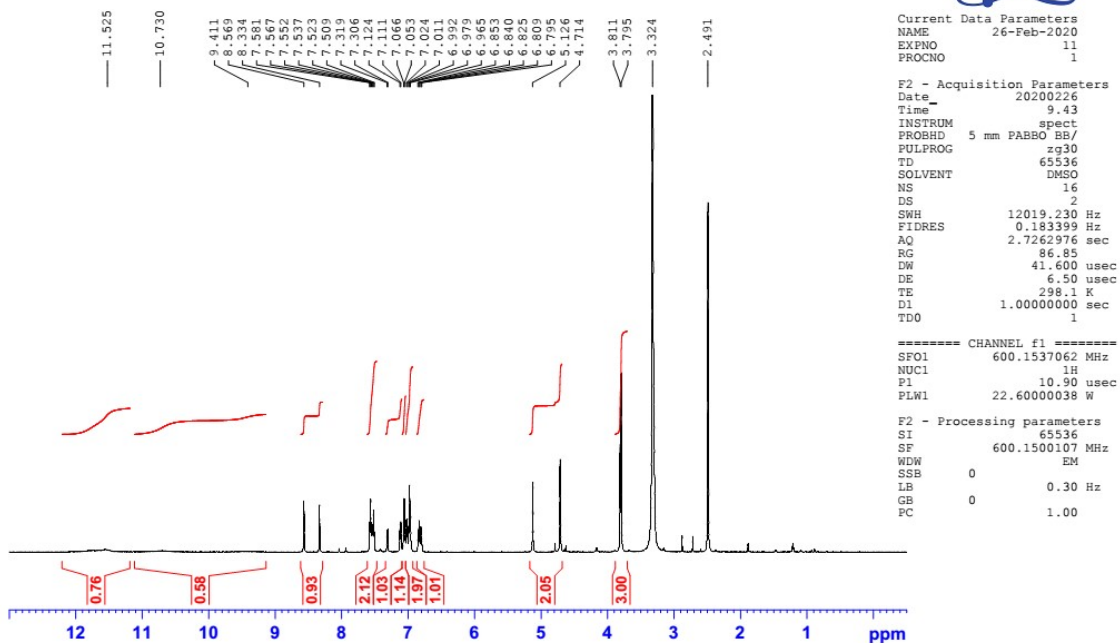

Figure S28:  $^1\text{H}$  NMR OF COMPOUND 4h

Dr. Ajmal / MIM08 / DMSO  
C13CPD

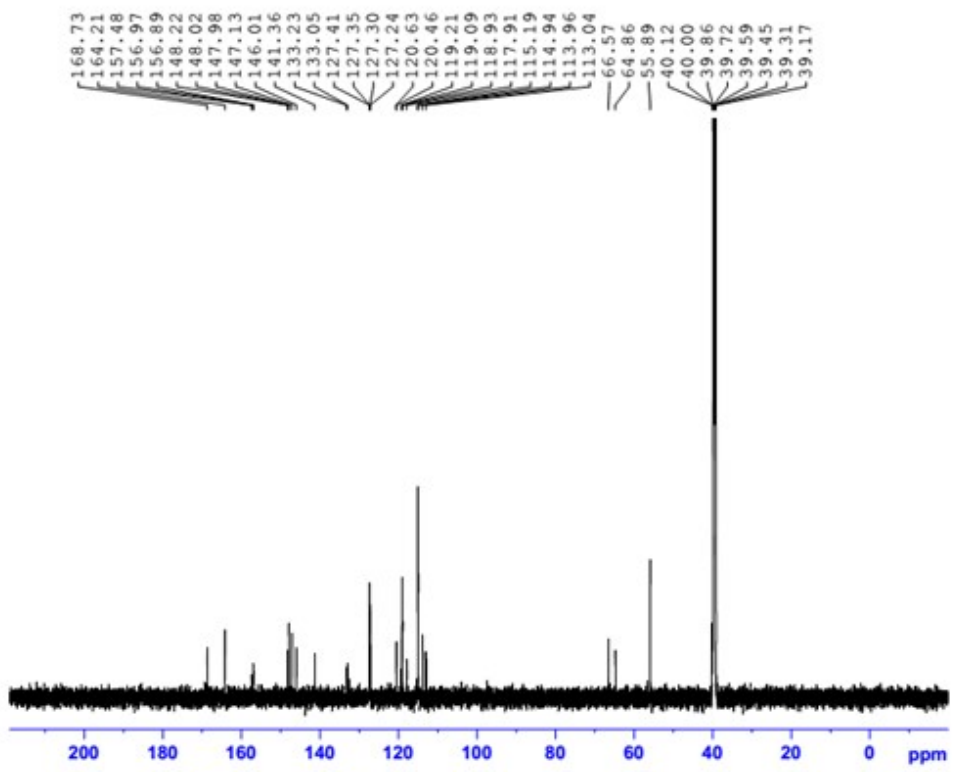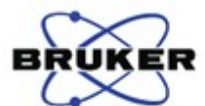

```
Current Data Parameters
NAME      19-Jan-2021
EXPNO    36
PROCNO   1

F2 - Acquisition Parameters
Data_    20210126
Time     12.34
INSTRUM  spect
PROBHD   5 mm PABBO 30P
PULPROG  zgpg30
TD        65536
SOLVENT  DMSO
NS        2048
DS        4
SWH       34057.491 Hz
FIDRES    0.550197 Hz
AQ         0.9087499 sec
RG         195.2
DM         11.547 usec
DE         6.50 usec
TE         294.2 K
D1         2.0000000 sec
d11        0.0300000 sec
TD0        1

----- CHANNEL f1 -----
SF01      150.9229276 MHz
NUC1       13C
P1         11.60 usec
PLM1       83.0000000 W

----- CHANNEL f2 -----
SF02      600.1524006 MHz
NUC2       1H
CPCPRG2   waltz16
PCPD2     70.00 usec
PLM2      22.4000000 W
PLM3      0.25874999 W

F2 - Processing parameters
SI         32768
SF         150.9079041 MHz
WOW        DM
SFR        0
LA         1.00 Hz
GB         0
PC         1.40
```

Figure S29: <sup>13</sup>C NMR OF COMPOUND 4h

|                    |                     |                               |         |                        |                      |
|--------------------|---------------------|-------------------------------|---------|------------------------|----------------------|
| <b>Sample Name</b> | MIM-08              | <b>Position</b>               | Vial 38 | <b>Instrument Name</b> | Instrument 1         |
| <b>User Name</b>   |                     | <b>Inj Vol</b>                | 10      | <b>InjPosition</b>     |                      |
| <b>Sample Type</b> | Sample              | <b>IRM Calibration Status</b> | Success | <b>Data Filename</b>   | MIM-08_NEG_01.d      |
| <b>ACQ Method</b>  | NEG ION METHOD MS.m | <b>Comment</b>                |         | <b>Acquired Time</b>   | 10-Mar-20 4:14:38 PM |

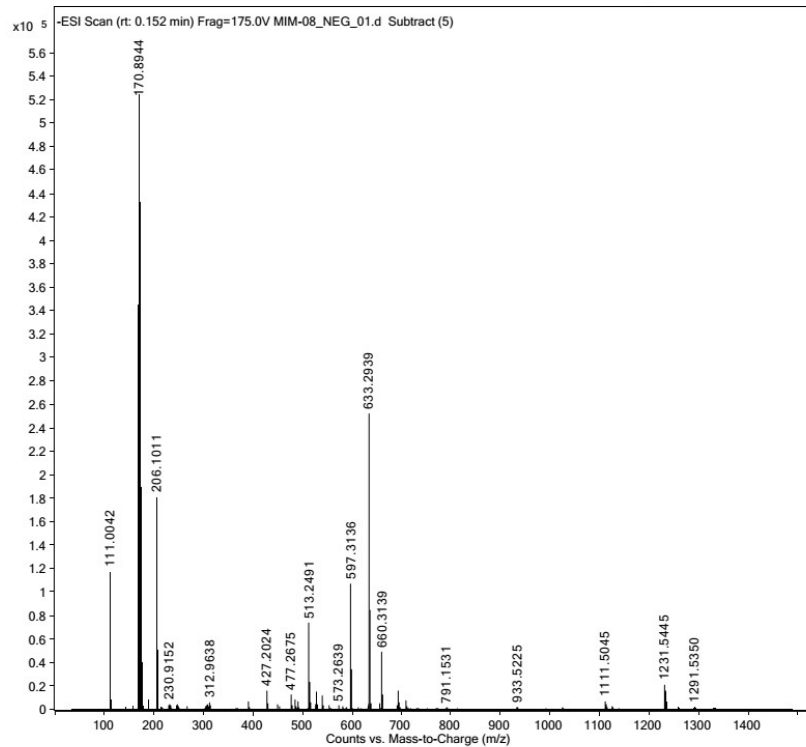

Figure S30: HR-MS OF COMPOUND 4h

Dr. Ajmal/Prof. Ahmed/M1M-09/DMSO  
PROTON

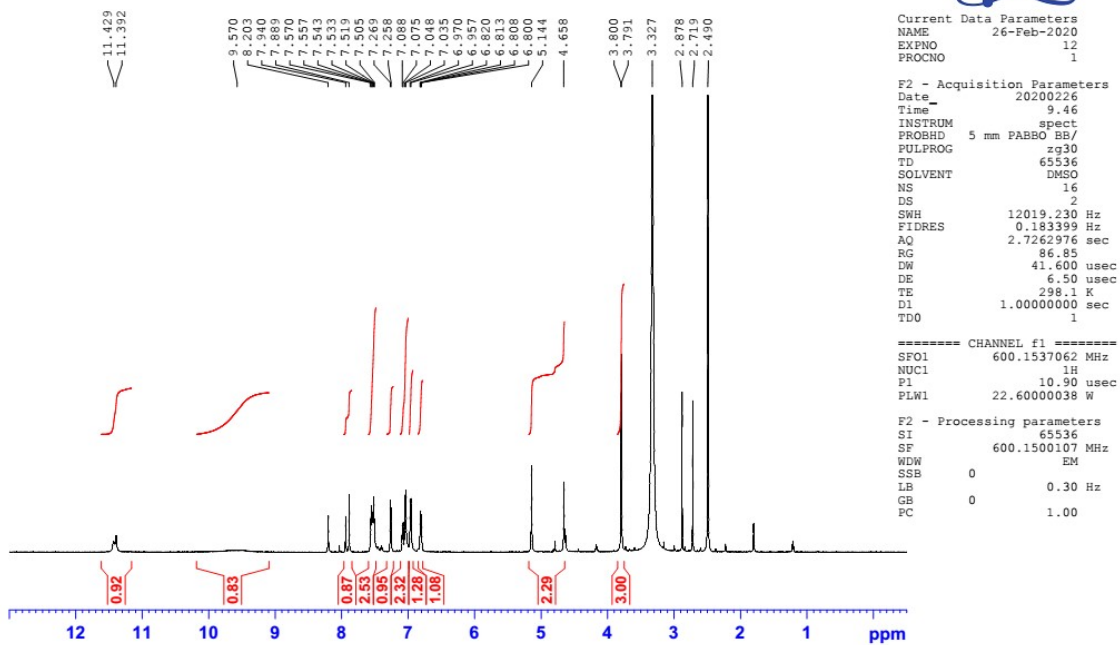

Figure S31:  $^1\text{H}$  NMR OF COMPOUND 4i

Dr. Ajmal / MIM09 / DMSO  
C13CPD

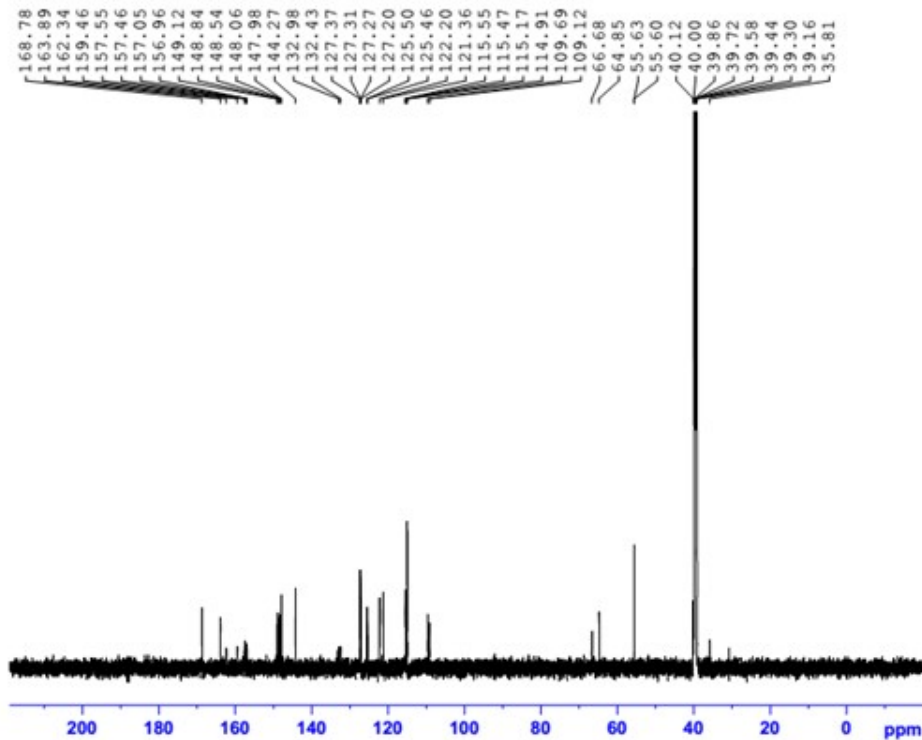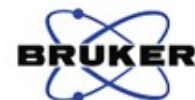

```
Current Data Parameters
NAME      28-Jan-2021
EXPNO     10
PROCNO    1

F2 - Acquisition Parameters
Date_     20210129
Time      7.56
INSTRUM   spect
PROBHD    5 mm PABBO MM7
PULPROG   zgpg30
TD         65536
SOLVENT   DMSO
NS         2048
DS         4
SWH        36057.691 Kz
FIDRES     0.550197 Kz
AQ         0.9087659 sec
RG         195.2
CW         13.867 usec
DE         6.50 usec
TE         294.4 K
D1         2.00000000 sec
d11        0.03000000 sec
TD0        1

----- CHANNEL f1 -----
SF01      150.9229274 MHz
WDW01     1.30
SSB01     11.60 usec
PLM01     83.00000000 W

----- CHANNEL f2 -----
SF02      600.1524004 MHz
WDW02     18
SSB02     wait:16
PCPD02    70.00 usec
PLM02     22.60000038 W
PLM03     0.25806001 W
PLM03     0.25874999 W

F2 - Processing parameters
SI         32768
SF         150.9079041 MHz
WDW        EM
SSB        0
LB         1.00 Hz
GB         0
PC         1.40
```

Figure S32: <sup>13</sup>C NMR OF COMPOUND 4i



|                    |                     |                               |         |                        |                      |
|--------------------|---------------------|-------------------------------|---------|------------------------|----------------------|
| <b>Sample Name</b> | MIM-09              | <b>Position</b>               | Vial 39 | <b>Instrument Name</b> | Instrument 1         |
| <b>User Name</b>   |                     | <b>Inj Vol</b>                | 10      | <b>InjPosition</b>     |                      |
| <b>Sample Type</b> | Sample              | <b>IRM Calibration Status</b> | Success | <b>Data Filename</b>   | MIM-09_NEG_01.d      |
| <b>ACQ Method</b>  | NEG ION METHOD MS.m | <b>Comment</b>                |         | <b>Acquired Time</b>   | 10-Mar-20 4:21:48 PM |

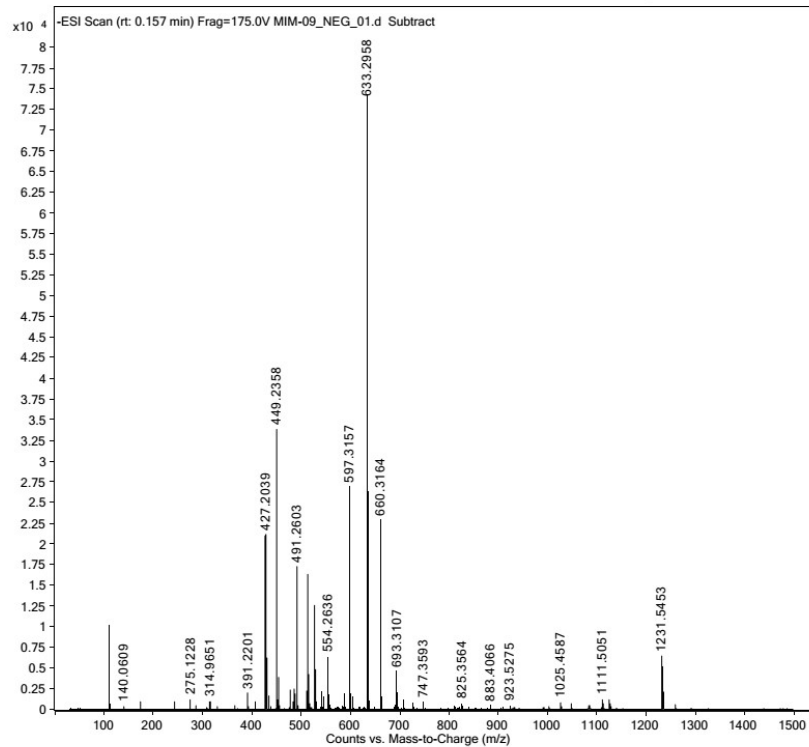

Figure S33: HR-MS OF COMPOUND 4i

Dr. Ajmal/Prof. Ahmed/M1M-10/DMSO  
PROTON

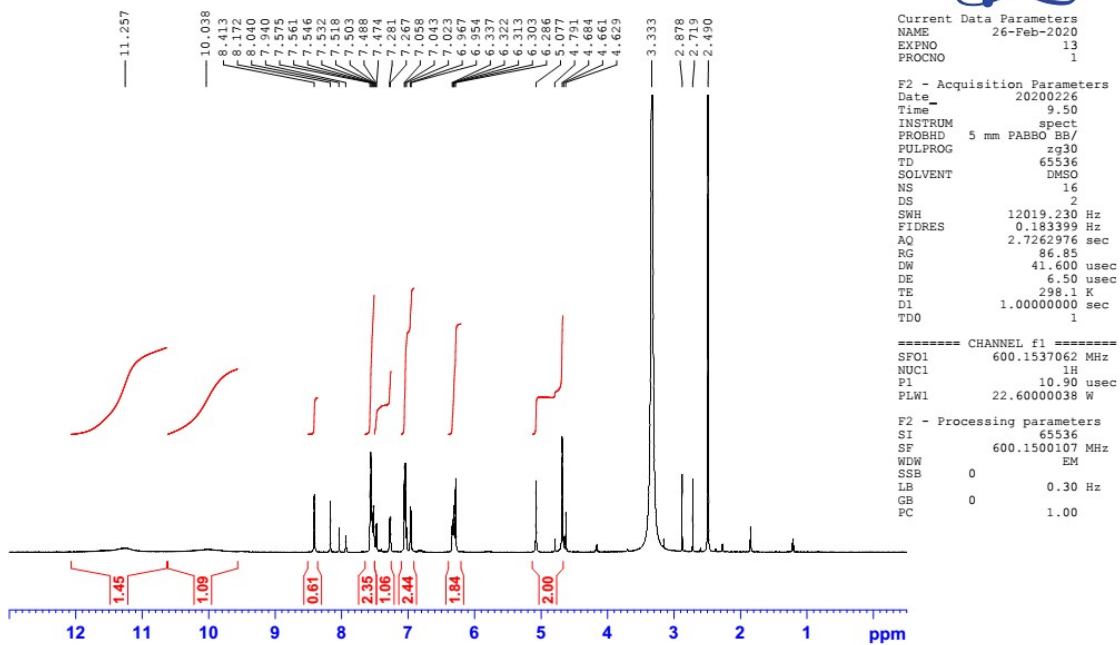

Figure S34:  $^1\text{H}$  NMR OF COMPOUND 4j

Dr. Ajmal / MIM10 / DMSO  
C13CPD

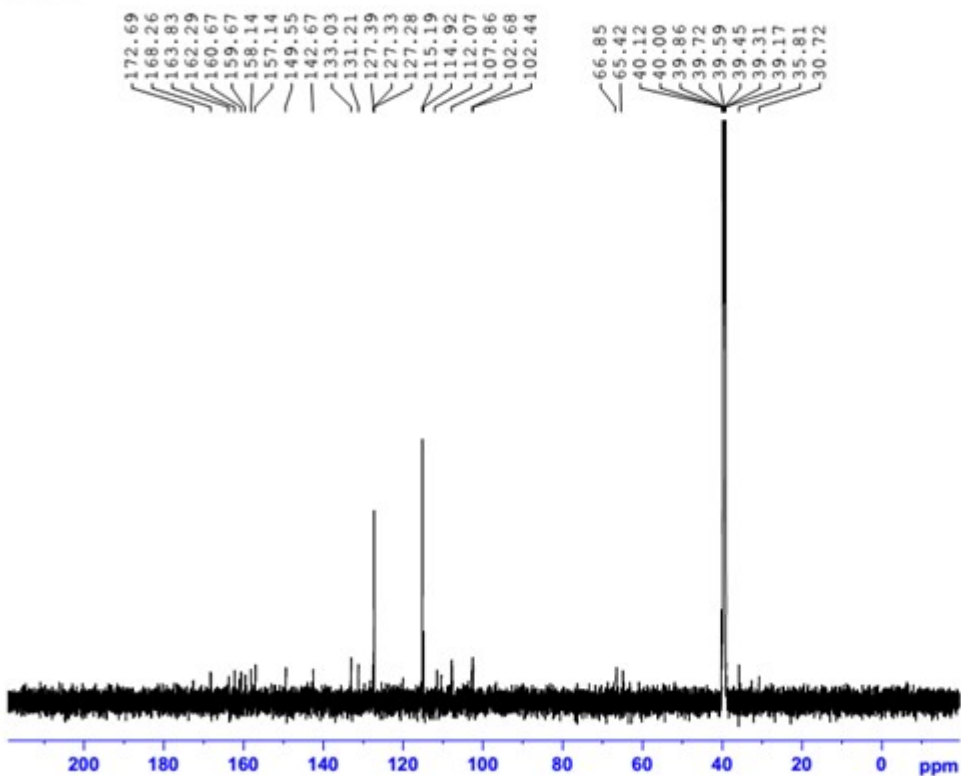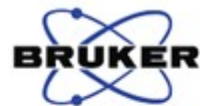

```
Current Data Parameters
NAME      28-Jan-2021
EXPRO     22
PROCNO    1

F2 = Acquisition Parameters
Data_     20210129
Time      22.20
INSTRUM   spect
PROBHD    5 mm PABBO BB/
PULPROG   zgpg30
TD         65536
SOLVENT   DMSO
NS         2048
DS         4
SWH        36057.491 Hz
FIDRES     0.550197 Hz
AQ         0.9027459 sec
RG         195.2
DN         11.867 usec
DE         4.50 usec
TE         298.2 K
D1         2.00000000 sec
D11        0.03000000 sec
TD0        1

----- CHANNEL f1 -----
SFO1      150.9219276 MHz
NUC1       13C
P1         11.60 usec
PLA1       03.00000000 W

----- CHANNEL f2 -----
SFO2      400.1524006 MHz
NUC2       1H
CFPPROG[2]  waltz16
PCPD[2]    70.00 usec
PLA2       22.40000000 W
PLA3       0.52000000 W
PLA4       0.25874999 W

F2 = Processing parameters
SI         32768
SF         150.9079041 MHz
WDW        EM
SSB        0
LB         1.00 Hz
GB         0
PC         1.40
```

Figure S35:  $^{13}\text{C}$  NMR OF COMPOUND 4j

|                    |                     |                               |         |                        |                      |
|--------------------|---------------------|-------------------------------|---------|------------------------|----------------------|
| <b>Sample Name</b> | MIM-10              | <b>Position</b>               | Vial 40 | <b>Instrument Name</b> | Instrument 1         |
| <b>User Name</b>   |                     | <b>Inj Vol</b>                | 10      | <b>InjPosition</b>     |                      |
| <b>Sample Type</b> | Sample              | <b>IRM Calibration Status</b> | Success | <b>Data Filename</b>   | MIM-10_NEG_01.d      |
| <b>ACQ Method</b>  | NEG ION METHOD MS.m | <b>Comment</b>                |         | <b>Acquired Time</b>   | 10-Mar-20 4:29:00 PM |

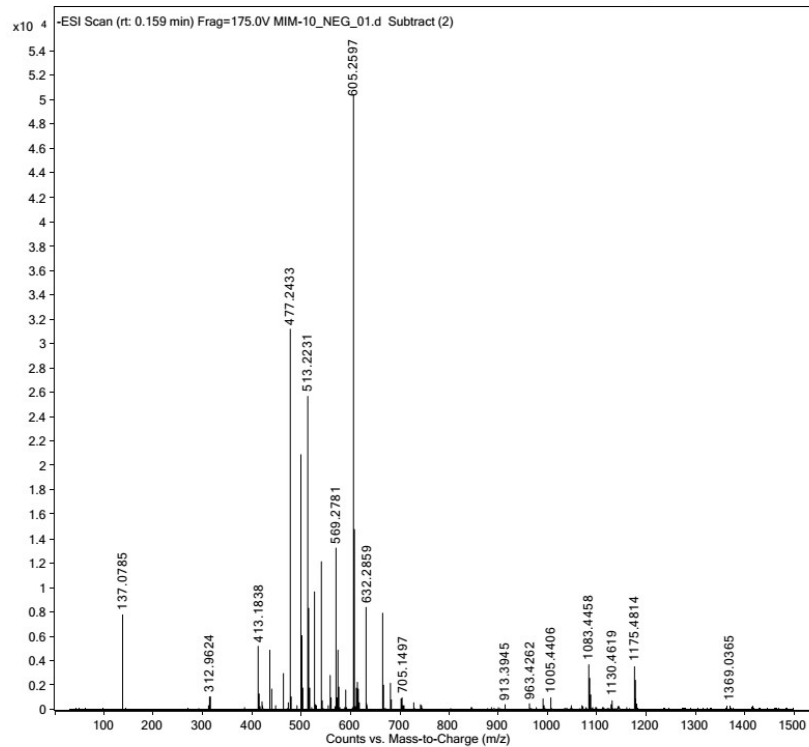

Figure S36: HR-MS OF COMPOUND 4j

Dr. Ajmal/Prof. Ahmed/M1M-11/DMSO  
PROTON

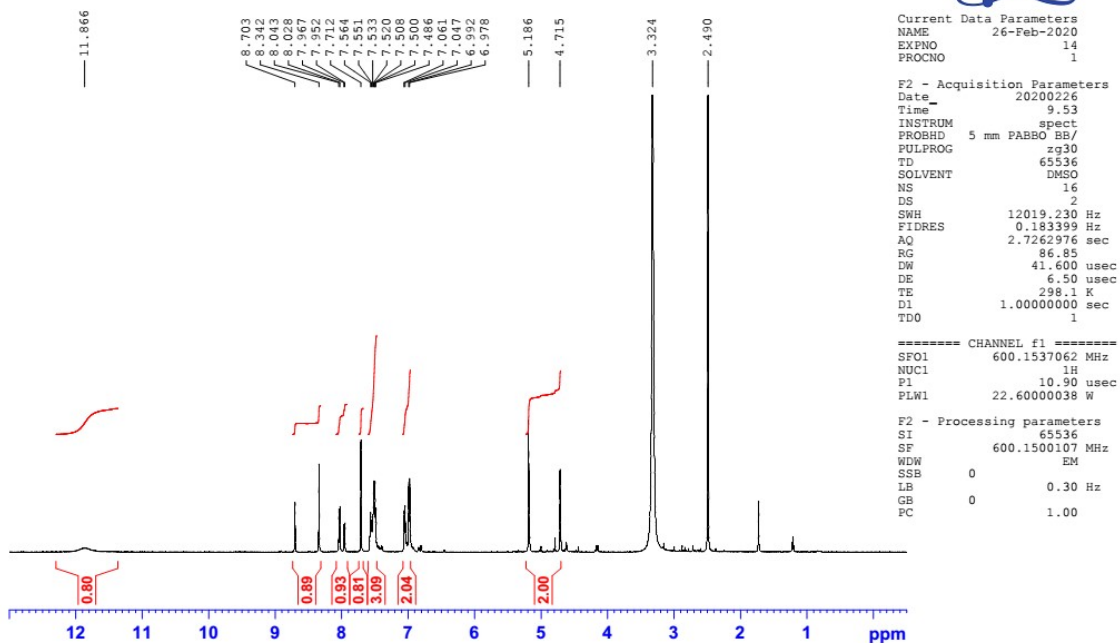

Figure S37:  $^1\text{H}$  NMR OF COMPOUND 4k

Dr. Ajmal / MIM11 / DMSO  
C13CPD

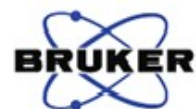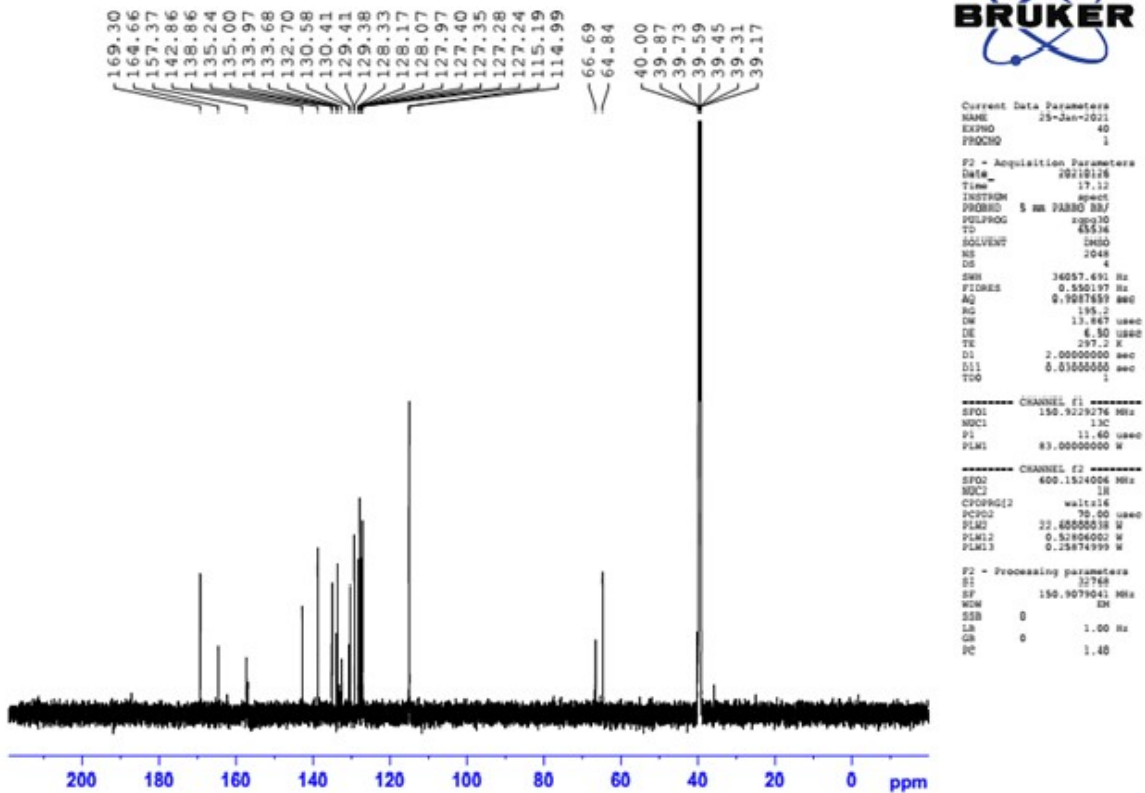

Figure S38: <sup>13</sup>C NMR OF COMPOUND 4k

|                    |                     |                               |         |                        |                      |
|--------------------|---------------------|-------------------------------|---------|------------------------|----------------------|
| <b>Sample Name</b> | MIM-11              | <b>Position</b>               | Vial 41 | <b>Instrument Name</b> | Instrument 1         |
| <b>User Name</b>   |                     | <b>Inj Vol</b>                | 10      | <b>InjPosition</b>     |                      |
| <b>Sample Type</b> | Sample              | <b>IRM Calibration Status</b> | Success | <b>Data Filename</b>   | MIM-11_NEG_01.d      |
| <b>ACQ Method</b>  | NEG ION METHOD MS.m | <b>Comment</b>                |         | <b>Acquired Time</b>   | 10-Mar-20 4:36:11 PM |

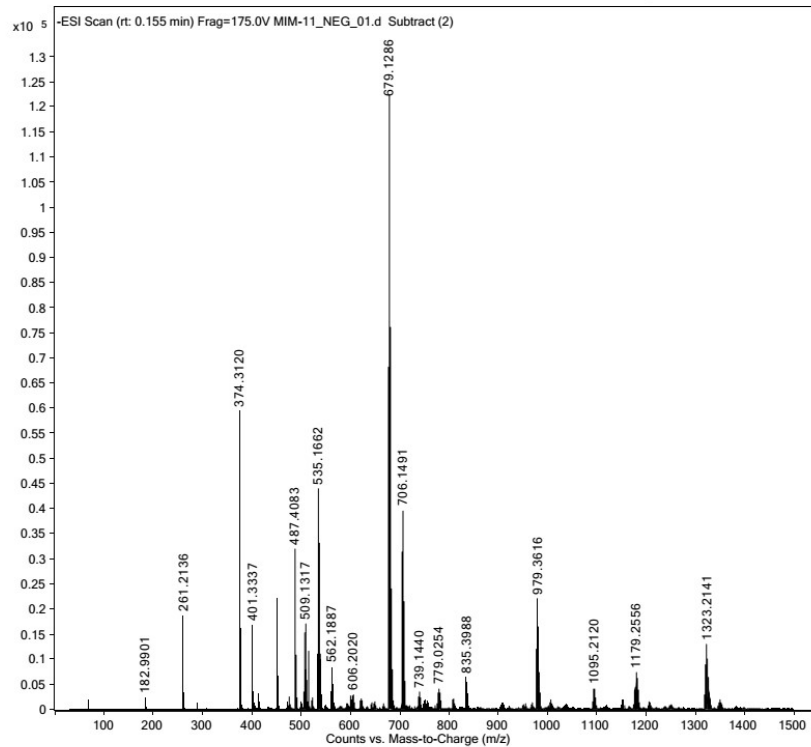

Figure S39: HR-MS OF COMPOUND 4k

Dr. Ajmal/Prof. Ahmed/M1M-12/DMSO  
PROTON

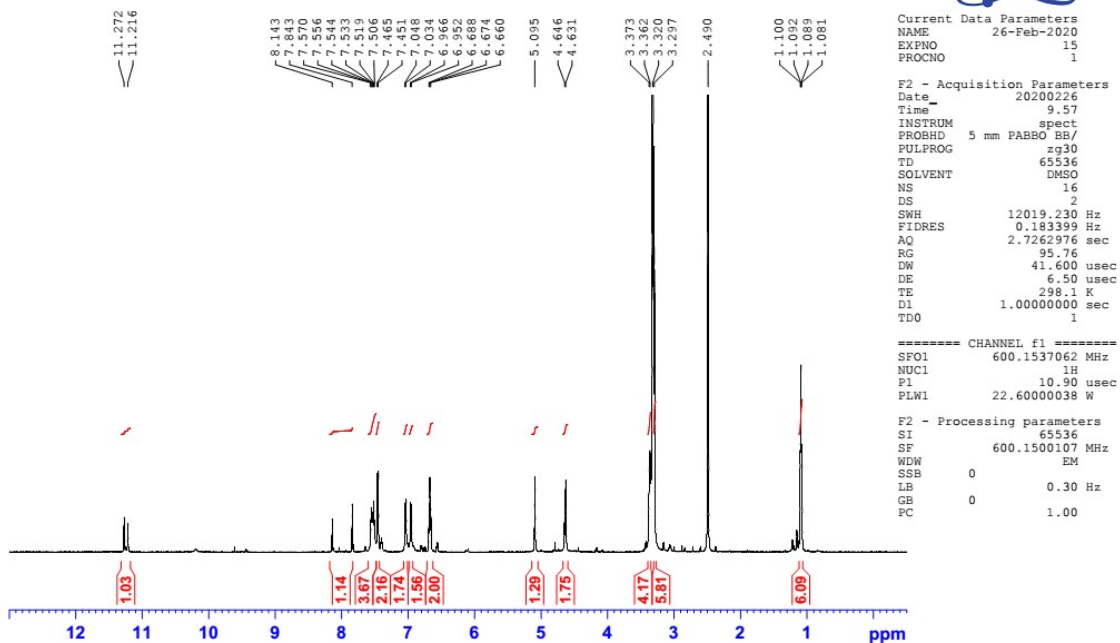

Figure S40: <sup>1</sup>H NMR OF COMPOUND 41



Dr. Ajmal / MIM12 / DMSO  
C13CPD

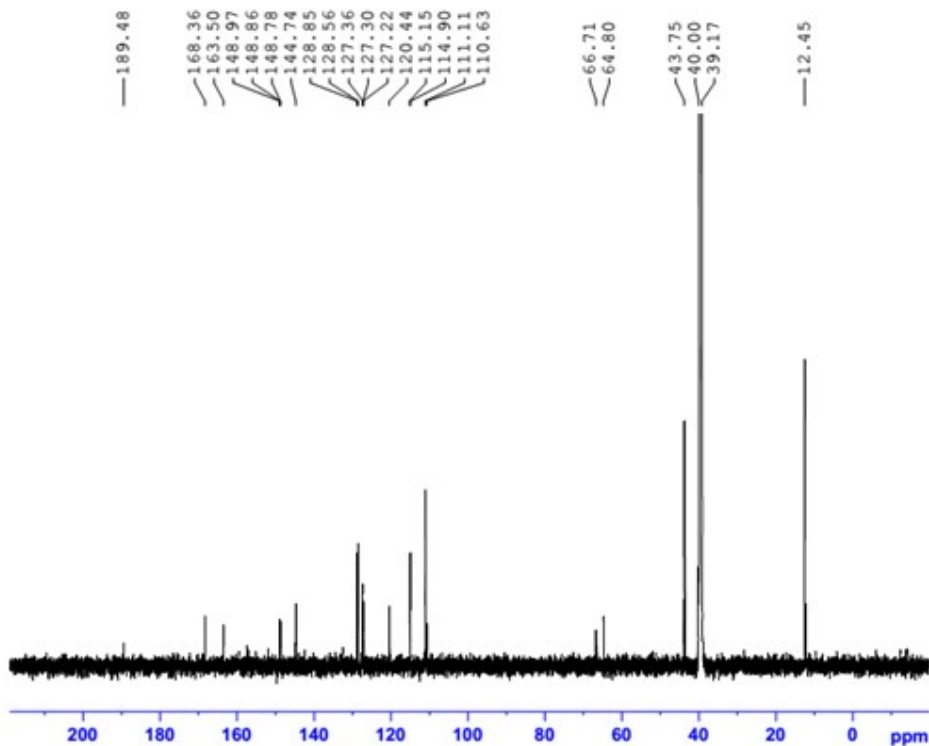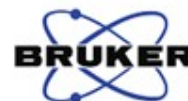

```
Current Data Parameters
NAME      25-Jan-2021
EXPNO    32
PROCNO   1

F2 - Acquisition Parameters
Date_    20210126
Time     9.39
INSTRUM spect
PROBHD   5 mm PABBO BBI
PULPROG zgpg30
TD       65536
SOLVENT  DMSO
NS       2048
DS       4
SWS     36051.491 Hz
FIDRES  0.550197 Hz
AQ      0.9087459 sec
RG      193.2
DM      11.867 usec
DE      6.50 usec
TE      296.3 K
D1      2.0000000 sec
D11     0.0300000 sec
TD0     1

===== CHANNEL f1 =====
SFO1   150.9229276 MHz
NUC1    13C
P1      11.60 usec
PLM1   83.0000000 W

===== CHANNEL f2 =====
SFO2   600.1524006 MHz
NUC2    1H
CPOPRG[2]  waltz16
PCYCL2  30.00 usec
PLM2   22.6000000 W
PLM12  0.52806002 W
PLM13  0.25874999 W

F2 - Processing parameters
SI      32768
SF      150.9079041 MHz
WDW     EM
SSB     0
LB      2.00 Hz
GB      0
PC      1.40
```

Figure S41:  $^{13}\text{C}$  NMR OF COMPOUND 41

|                    |                     |                               |         |                        |                      |
|--------------------|---------------------|-------------------------------|---------|------------------------|----------------------|
| <b>Sample Name</b> | MIM-12              | <b>Position</b>               | Vial 42 | <b>Instrument Name</b> | Instrument 1         |
| <b>User Name</b>   |                     | <b>Inj Vol</b>                | 10      | <b>InjPosition</b>     |                      |
| <b>Sample Type</b> | Sample              | <b>IRM Calibration Status</b> | Success | <b>Data Filename</b>   | MIM-12_NEG_01.d      |
| <b>ACQ Method</b>  | NEG ION METHOD MS.m | <b>Comment</b>                |         | <b>Acquired Time</b>   | 10-Mar-20 4:43:20 PM |

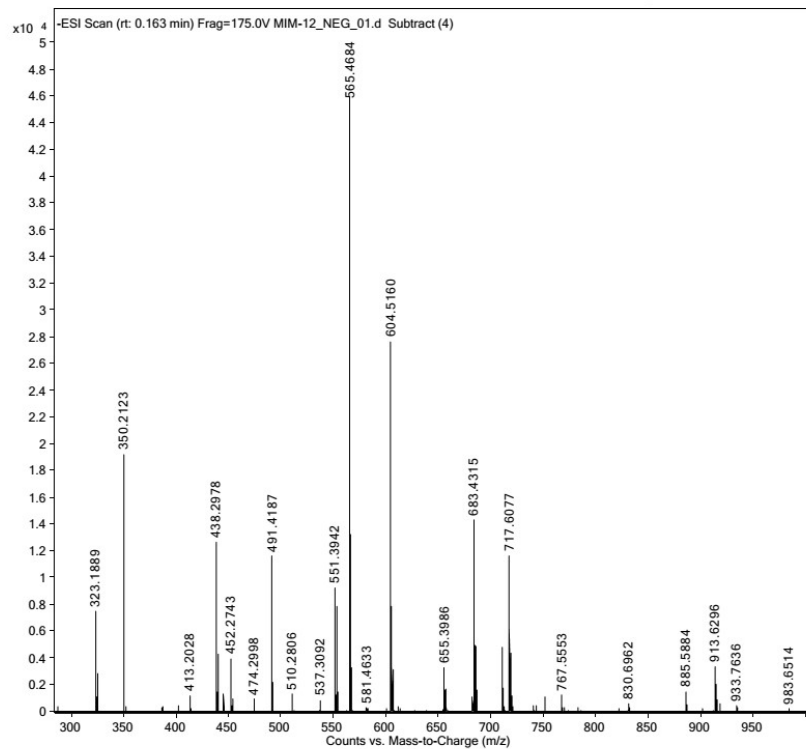

Figure S42: HR-MS OF COMPOUND 41

Dr. Ajmal/Prof. Ahmed/M1M-13/DMSO  
PROTON

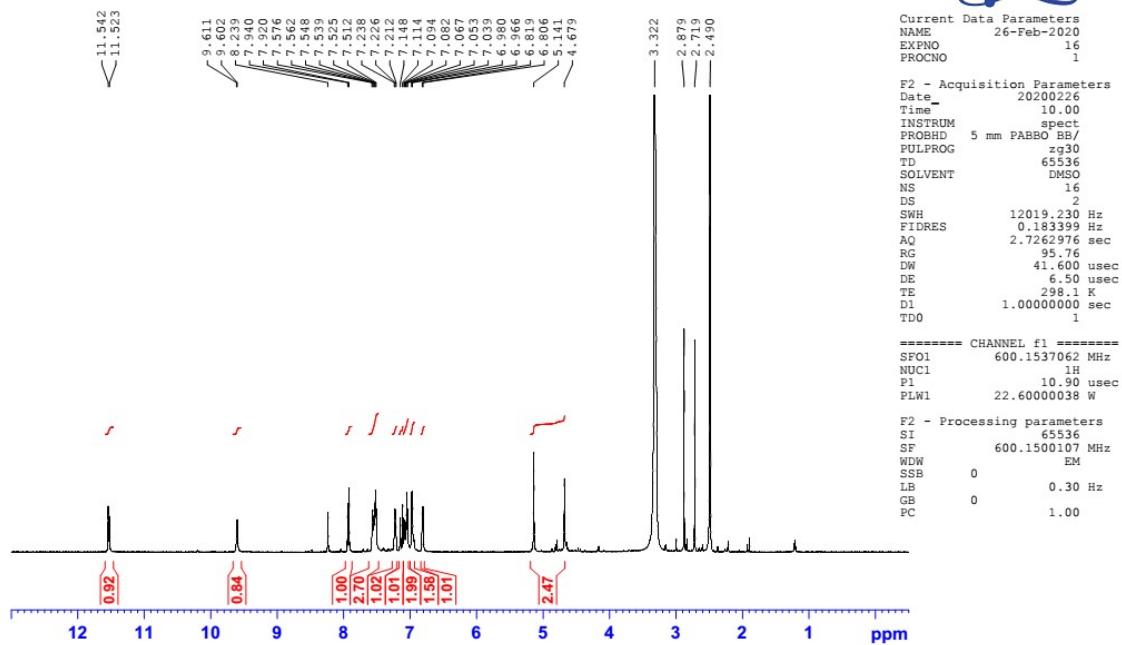

Figure S43:  $^1\text{H}$  NMR OF COMPOUND 4m

Dr. Ajmal / M1M13 / DMSO  
C13CPD

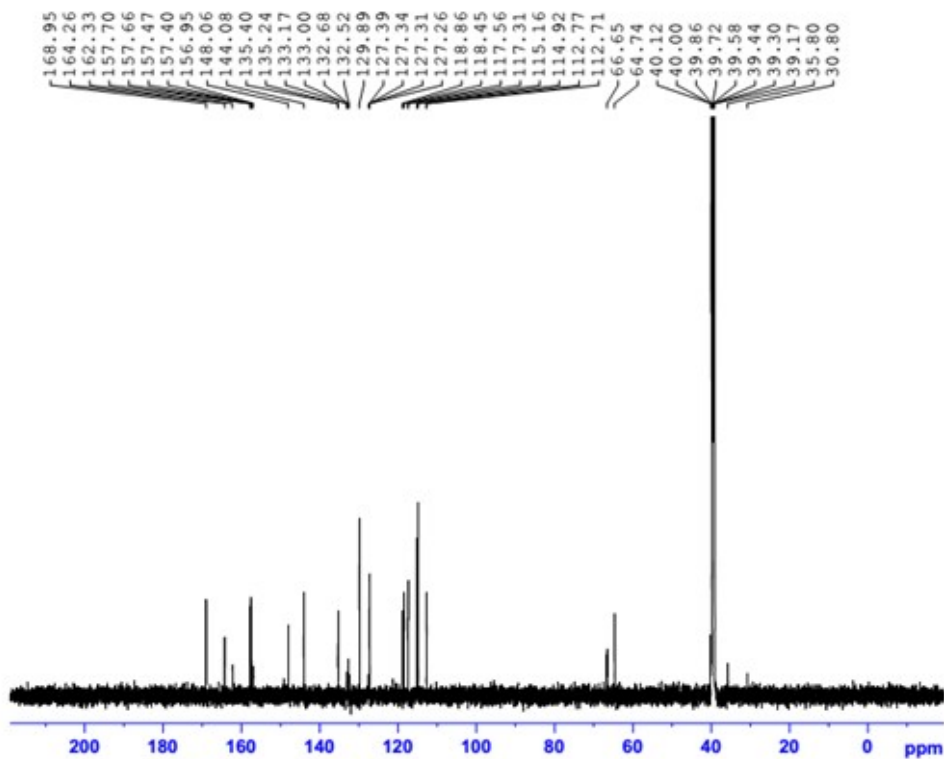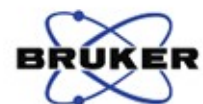

```
Current Data Parameters
NAME      28-Jan-2021
EXPRO    30
PROCNO   1

F2 - Acquisition Parameters
Date_    20210130
Time     5.32
INSTRUM  spect
PROBHD   5 mm PABBO BB/
PULPROG  zgpg30
TD       65536
SOLVENT  DMSO
NS       2048
DS       4
SWH      34057.491 Hz
FIDRES   0.550197 Hz
AQ       0.9057639 sec
RG       199.2
DM       13.847 usec
DE       6.50 usec
TE       294.4 K
D1       2.0000000 sec
D11      0.0300000 sec
TD0      1

----- CHANNEL f1 -----
SF01    150.9229276 MHz
MPC1    13C
P1      11.40 usec
PLM1    83.0000000 W

----- CHANNEL f2 -----
SF02    400.1524004 MHz
MPC2    1H
CPCPRG2 waltz16
PCPROG  70.00 usec
PLM2    22.6000000 W
PLM12   0.5240400 W
PLM13   0.15874999 W

F2 - Processing parameters
SI      32768
SF      150.9079041 MHz
WDW     EM
SSB     0
LB      1.00 Hz
GB      0
PC      1.40
```

Figure S44: <sup>13</sup>C NMR OF COMPOUND 4m

|                    |                     |                               |         |                        |                      |
|--------------------|---------------------|-------------------------------|---------|------------------------|----------------------|
| <b>Sample Name</b> | MIM-13              | <b>Position</b>               | Vial 43 | <b>Instrument Name</b> | Instrument 1         |
| <b>User Name</b>   |                     | <b>Inj Vol</b>                | 10      | <b>InjPosition</b>     |                      |
| <b>Sample Type</b> | Sample              | <b>IRM Calibration Status</b> | Success | <b>Data Filename</b>   | MIM-13_NEG_01.d      |
| <b>ACQ Method</b>  | NEG ION METHOD MS.m | <b>Comment</b>                |         | <b>Acquired Time</b>   | 10-Mar-20 4:50:26 PM |

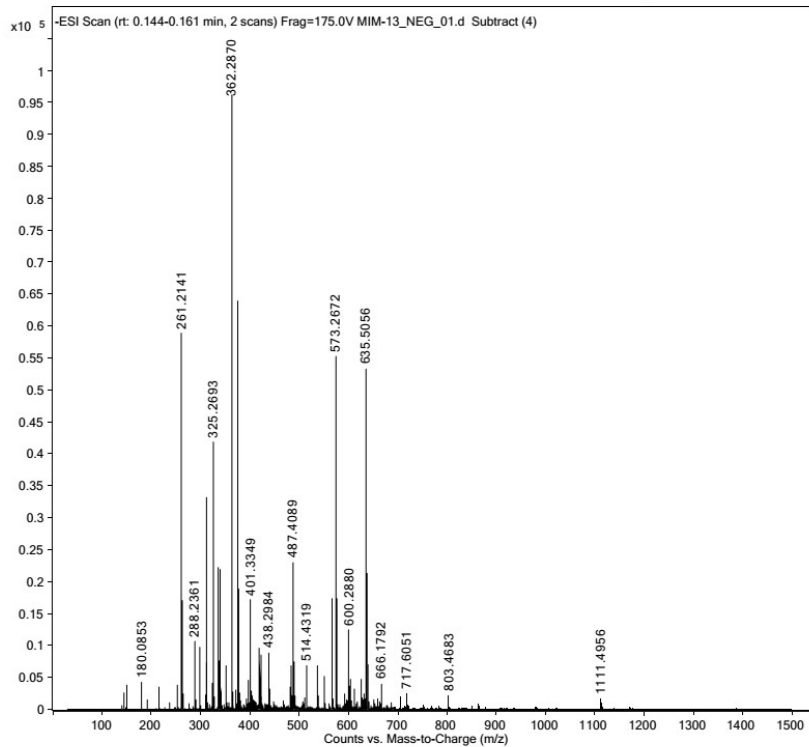

Figure S45: HR-MS OF COMPOUND 4m

Dr. Ajmal/Prof. Ahmed/M1M-14/DMSO  
PROTON

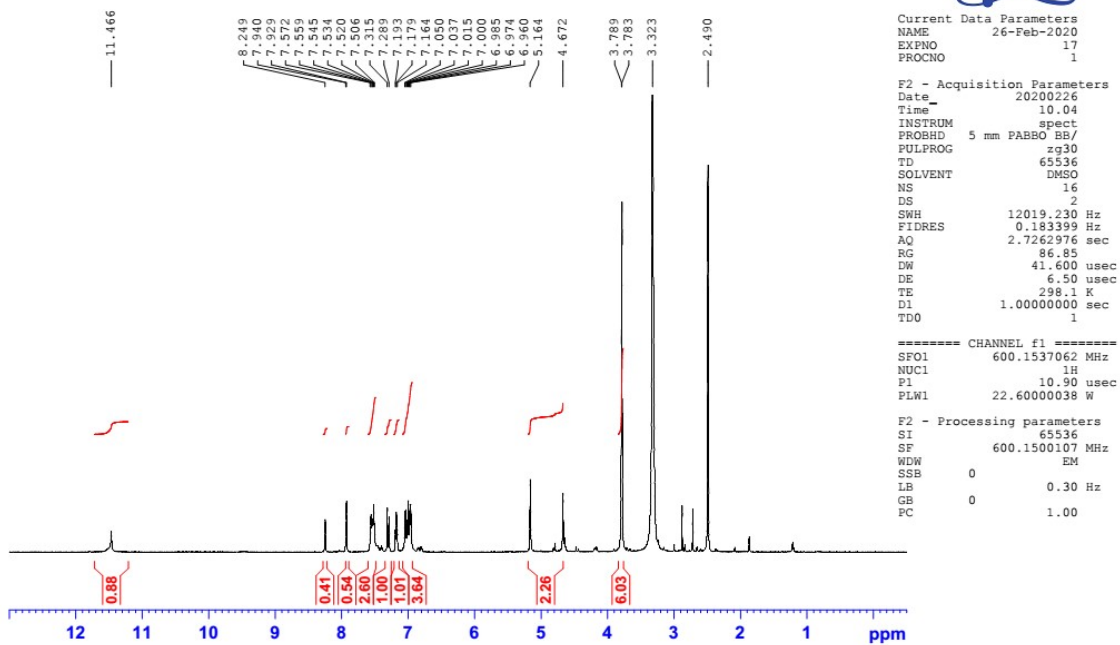

Figure S46:  $^1\text{H}$  NMR OF COMPOUND 4n

Dr. Ajmal / MIM14 / DMSO  
C13CPD

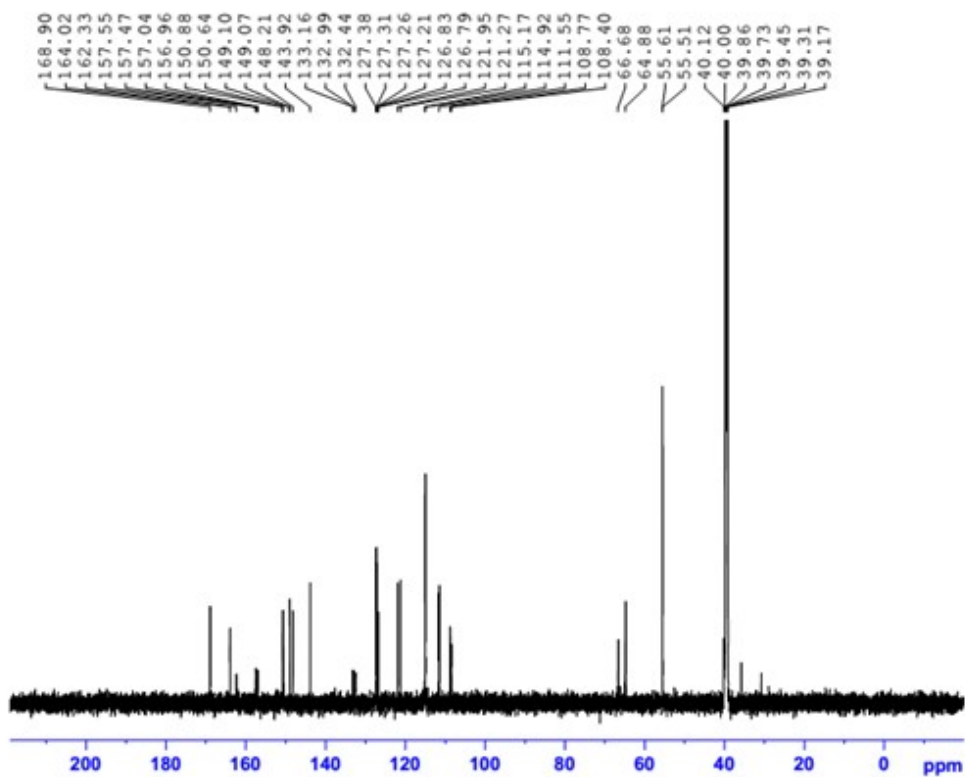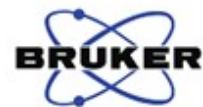

```
Current Data Parameters
NAME      28-Jan-2021
EXPRO    14
PROCNO   1

F2 - Acquisition Parameters
Date_    20181129
Time     15.08
INSTRUM  spect
PROBHD   5 mm BBOBO BB/
PULPROG  zgpg30
TD       65536
SOLVENT  DMSO
NS       2048
DS       4
SWH      34057.691 Hz
FIDRES   0.552197 Hz
AQ       0.9087659 sec
RG       195.2
OW       13.847 usec
SE       6.50 usec
TE       296.8 K
SI       2.0000000 sec
SII      0.0300000 sec
TDD      1

----- CHANNEL f1 -----
SFO1    150.9229276 MHz
NUC1     13C
P1      11.60 usec
PLM1    83.0000000 W

----- CHANNEL f2 -----
SFO2    600.1524004 MHz
NUC2     1H
CROSSPC2  wait1816
PCPD2    70.00 usec
PLM2    22.6000000 W
PLM12   0.52306002 W
PLM13   0.25874999 W

F2 - Processing parameters
SI       32768
SF       150.9079041 MHz
WDW      EM
SSB      0
LB       1.00 Hz
GB       0
PC       1.40
```

Figure S47:  $^{13}\text{C}$  NMR OF COMPOUND 4n

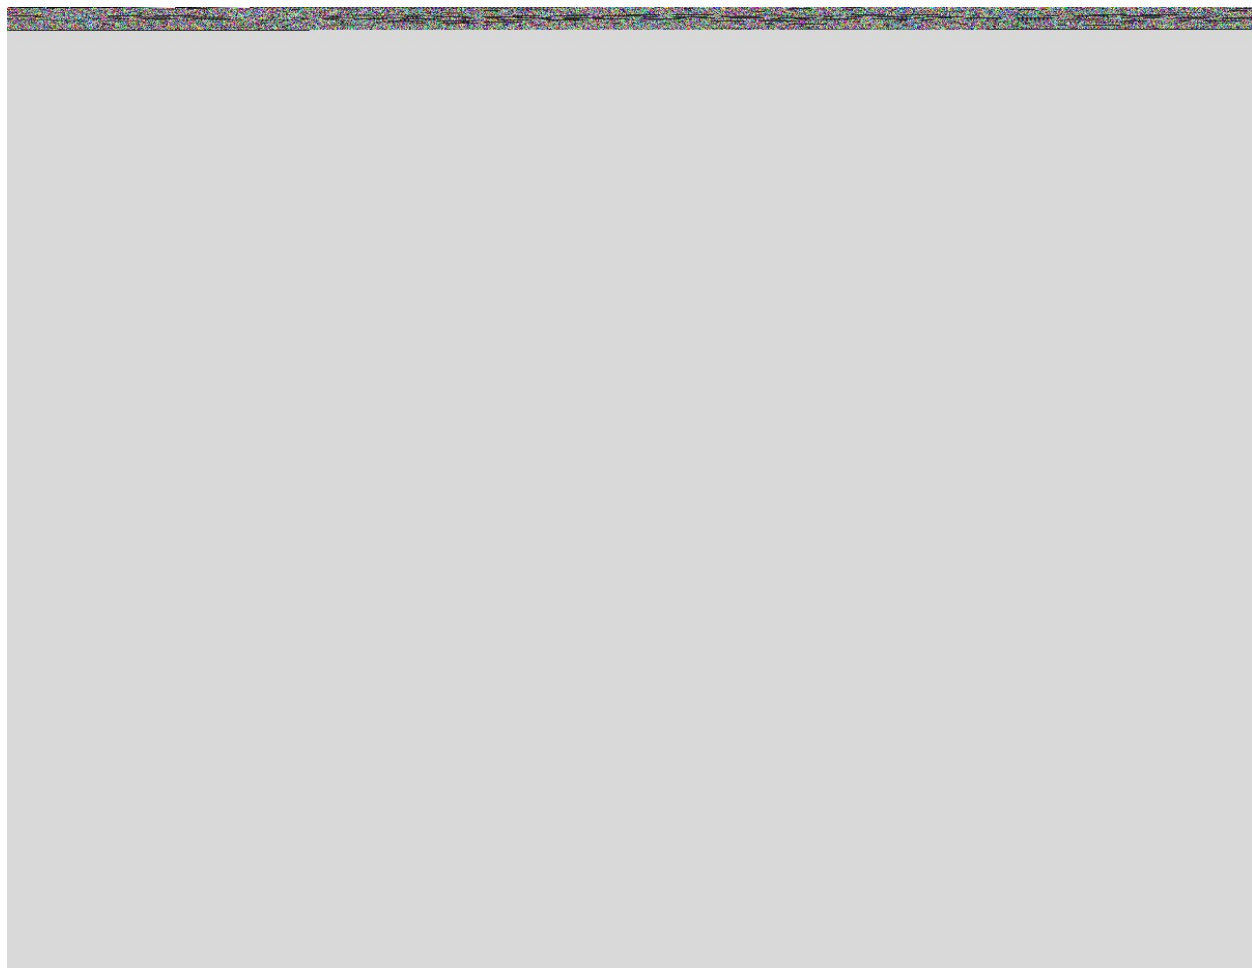

Figure S48: HR-MS OF COMPOUND 4n



Dr. Ajmal/Prof. Ahmed/M1M-15/DMSO  
PROTON

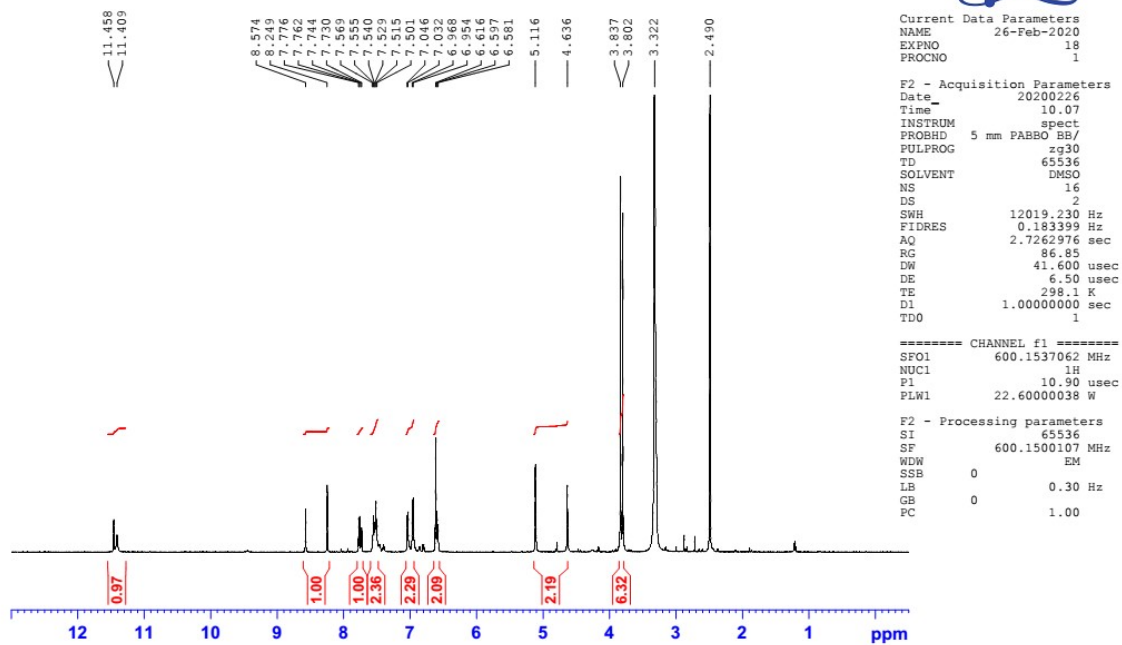

Figure S49: <sup>1</sup>H NMR OF COMPOUND 4o

Dr. Ajmal / MIM15 / DMSO  
C13CPD

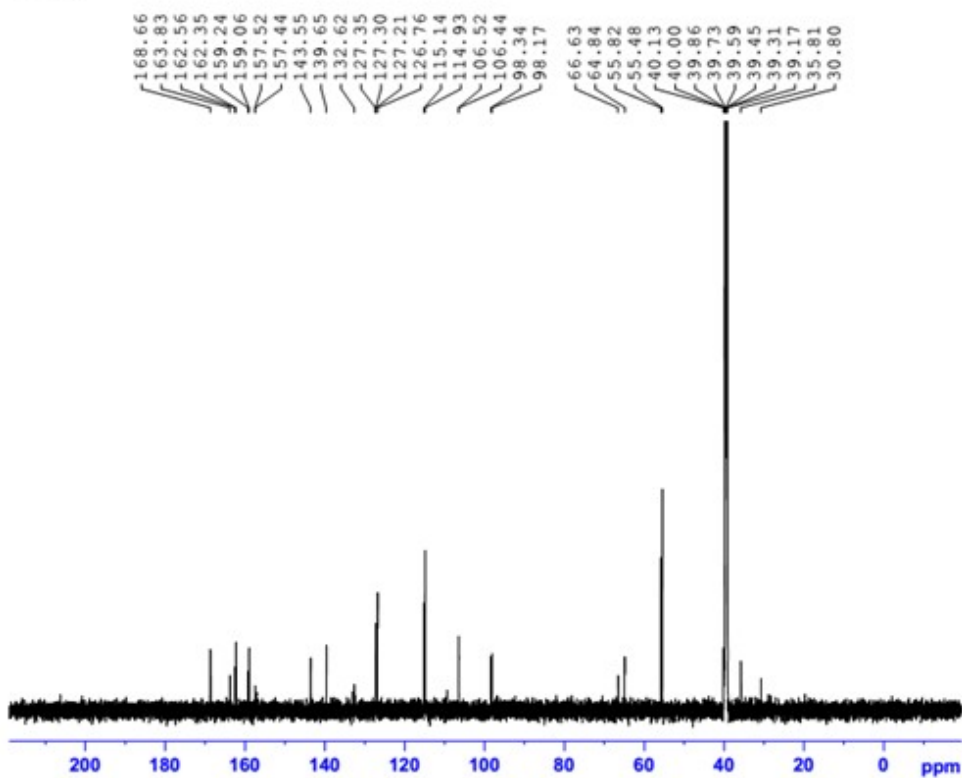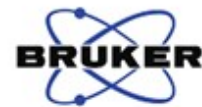

Current Data Parameters  
NAME 28-Jan-2021  
EXPRD 18  
PROCNO 1

F2 - Acquisition Parameters  
Date\_ 20210129  
Time 18.44  
INSTRM spect  
PROBHD 5 mm PABBO BB/  
PULPROG zgpg30  
TD 65536  
SOLVENT DMSO  
NS 2048  
DS 4  
SWH 34057.491 Hz  
FIDRES 0.590197 Hz  
AQ 0.9087659 sec  
RG 195.2  
DW 13.867 usec  
DE 6.50 usec  
TE 296.3 K  
D1 2.0000000 sec  
D11 0.0300000 sec  
TD0 1

----- CHANNEL f1 -----  
SFO1 150.9229274 MHz  
NUC1 13C  
P1 11.60 usec  
PLM1 83.0000000 W

----- CHANNEL f2 -----  
SFO2 600.1524004 MHz  
NUC2 1H  
CPCPRG2 waitx16  
PCPD2 70.00 usec  
PLM2 22.6000000 W  
PLM3 0.5204000 W  
PLM3 0.25874999 W

F2 - Processing parameters  
SI 32768  
SF 150.9079041 MHz  
WOW 0  
SSB 0  
LB 1.00 Hz  
GB 0  
PC 1.40

Figure S50: <sup>13</sup>C NMR OF COMPOUND 4o

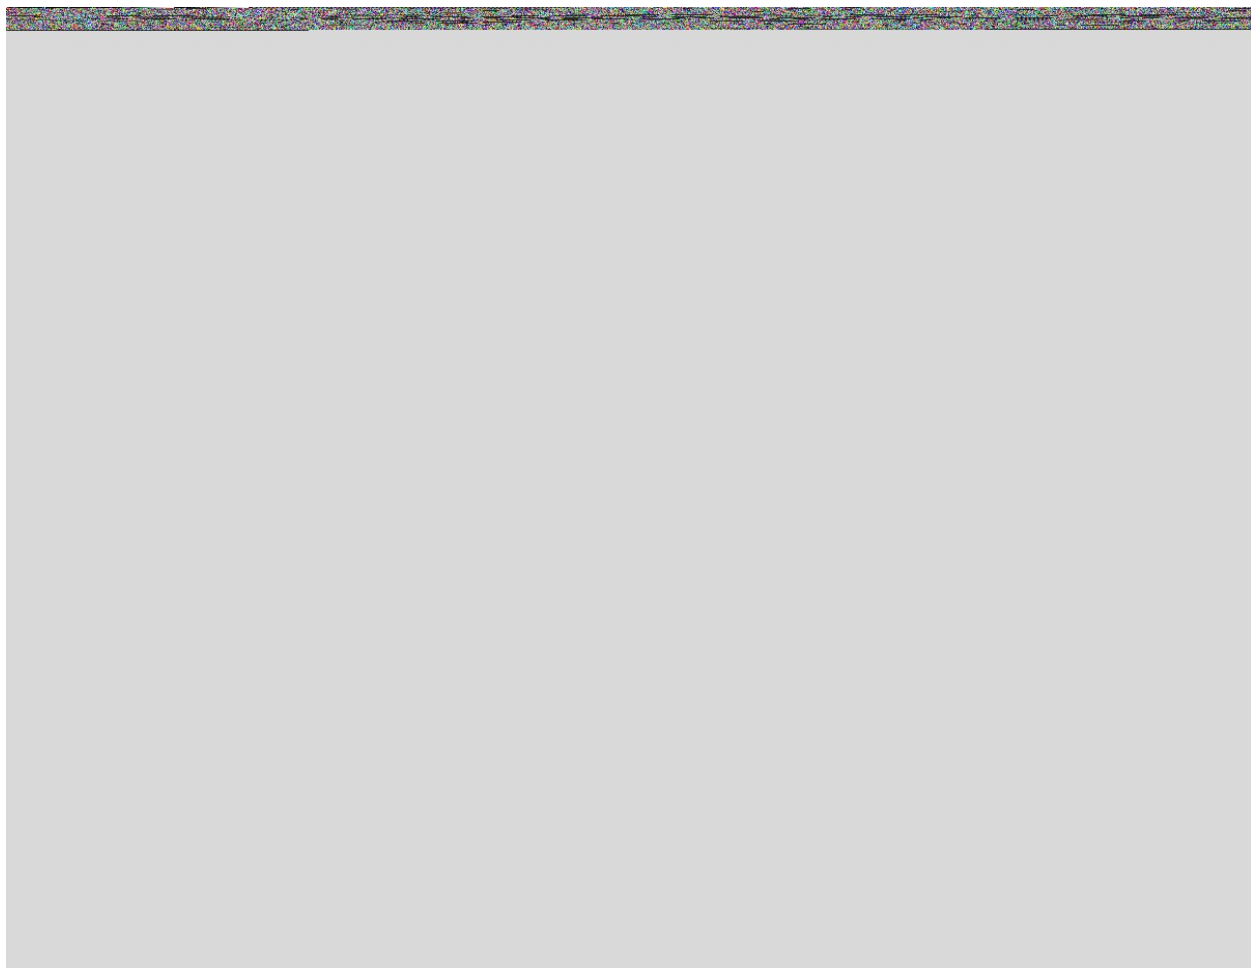

Figure S51: HR-MS OF COMPOUND 4n

Dr. Ajmal/Prof. Ahmed/M1M-16/DMSO  
PROTON

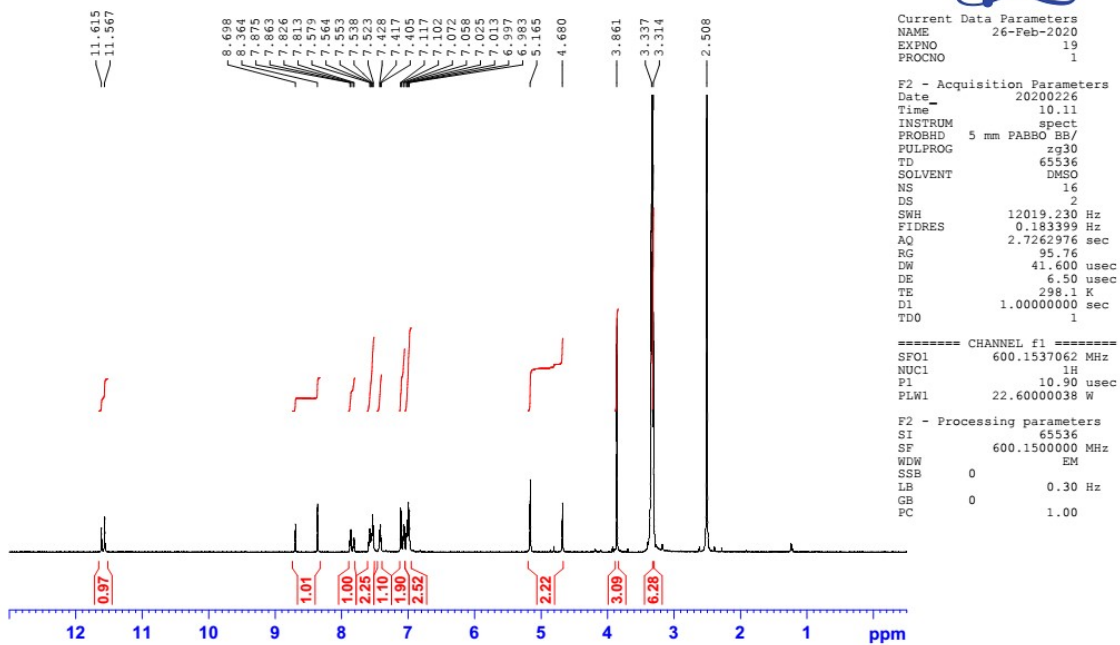

Figure S52:  $^1\text{H}$  NMR OF COMPOUND 4p

Dr. Ajmal / M1M16 / DMSO  
C13CPD

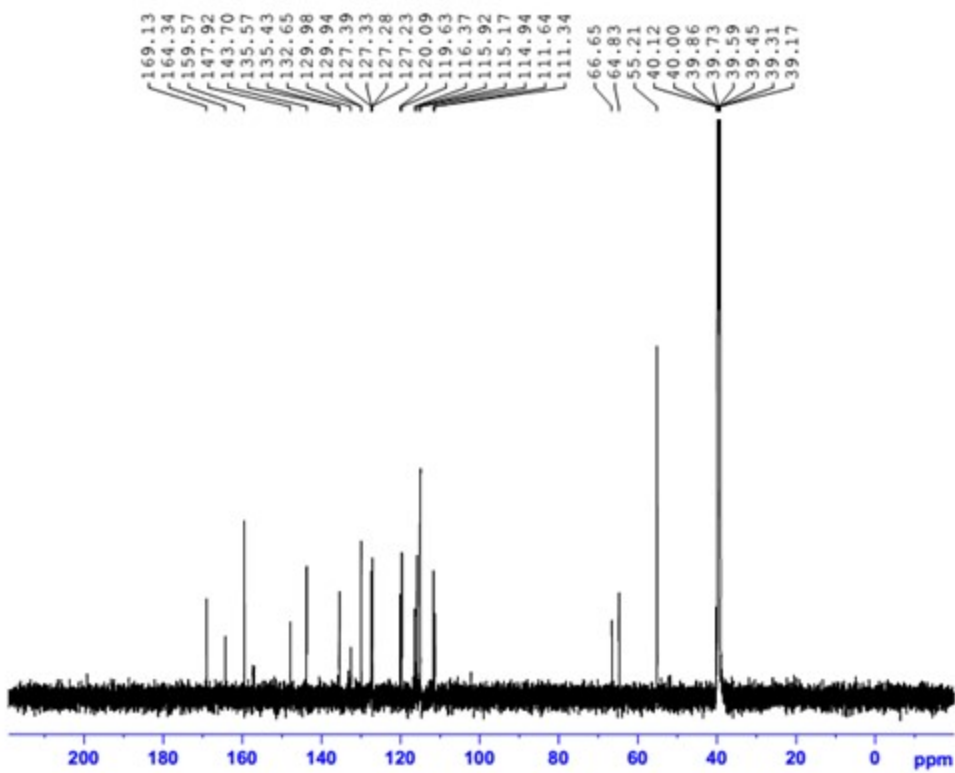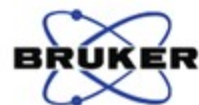

```
Current Data Parameters
NAME      28-Jan-2021
EXPNO    36
PROCNO    1

F2 - Acquisition Parameters
Date_     20210130
Time      12.44
INSTRUM   spect
PROBHD    5 mm QNP300
PULPROG   zgpg30
TD         65536
SOLVENT   DMSO
NS         2048
DS         4
SWH        36057.491 Hz
FIDRES    0.550197 Hz
AQ         0.9087459 sec
RG         198.2
DW         13.847 usec
DE         6.50 usec
TE         296.4 K
D1         2.0000000 sec
D11        0.0300000 sec
TOD        1

----- CHANNEL f1 -----
SFO1      150.9229276 MHz
MPC1      13C
P1         11.60 usec
PLW1      83.0000000 W

----- CHANNEL f2 -----
SFO2      400.1524004 MHz
MPC2      1H
CPOPRG[2] waltz16
PCPD2     70.00 usec
PLW2      22.6000000 W
PLW3      0.5280600 W
PLW4      0.25874999 W

F2 - Processing parameters
SI         32768
SF         150.9079041 MHz
WDW        EM
SSB        0
LA         0
GB         0
PC         1.40
```

Figure S53: <sup>13</sup>C NMR OF COMPOUND 4p

|                    |                     |                               |         |                        |                      |
|--------------------|---------------------|-------------------------------|---------|------------------------|----------------------|
| <b>Sample Name</b> | MIM-16              | <b>Position</b>               | Vial 46 | <b>Instrument Name</b> | Instrument 1         |
| <b>User Name</b>   |                     | <b>Inj Vol</b>                | 10      | <b>InjPosition</b>     |                      |
| <b>Sample Type</b> | Sample              | <b>IRM Calibration Status</b> | Success | <b>Data Filename</b>   | MIM-16_NEG_01.d      |
| <b>ACQ Method</b>  | NEG ION METHOD MS.m | <b>Comment</b>                |         | <b>Acquired Time</b>   | 10-Mar-20 5:11:48 PM |

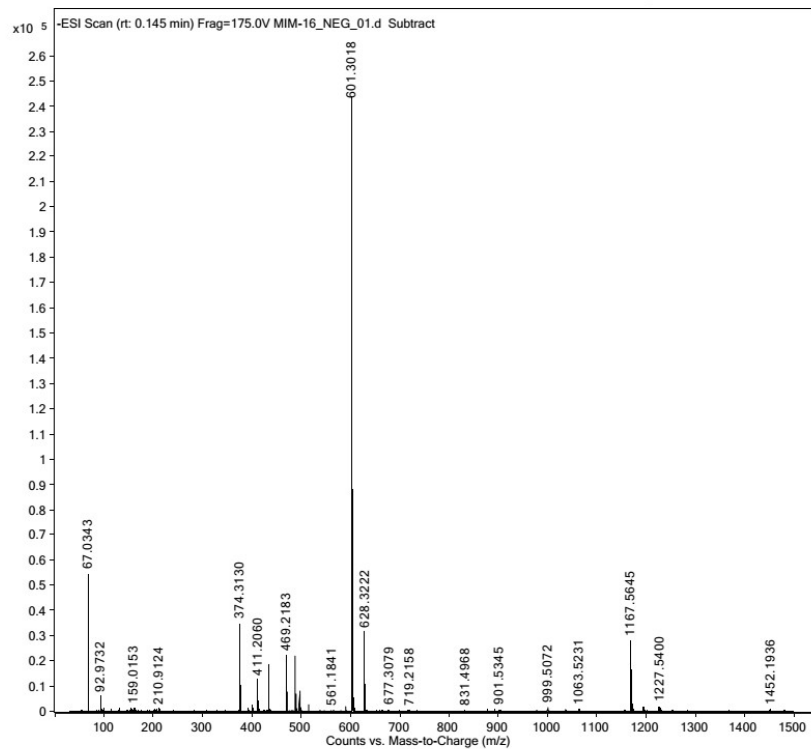

Figure S54: HR-MS OF COMPOUND 4p

Dr. Ajmal/Prof. Ahmed/M1M-17/DMSO  
PROTON

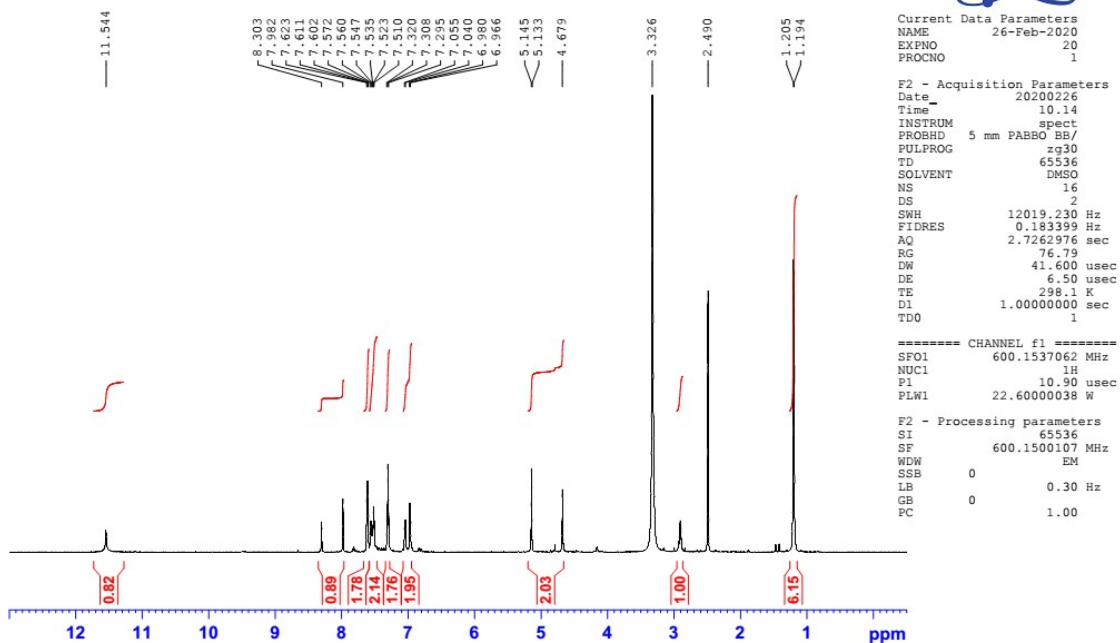

Figure S55:  $^1\text{H}$  NMR OF COMPOUND 4q

Dr. Ajmal / MIM17 / DMSO  
C13CPD

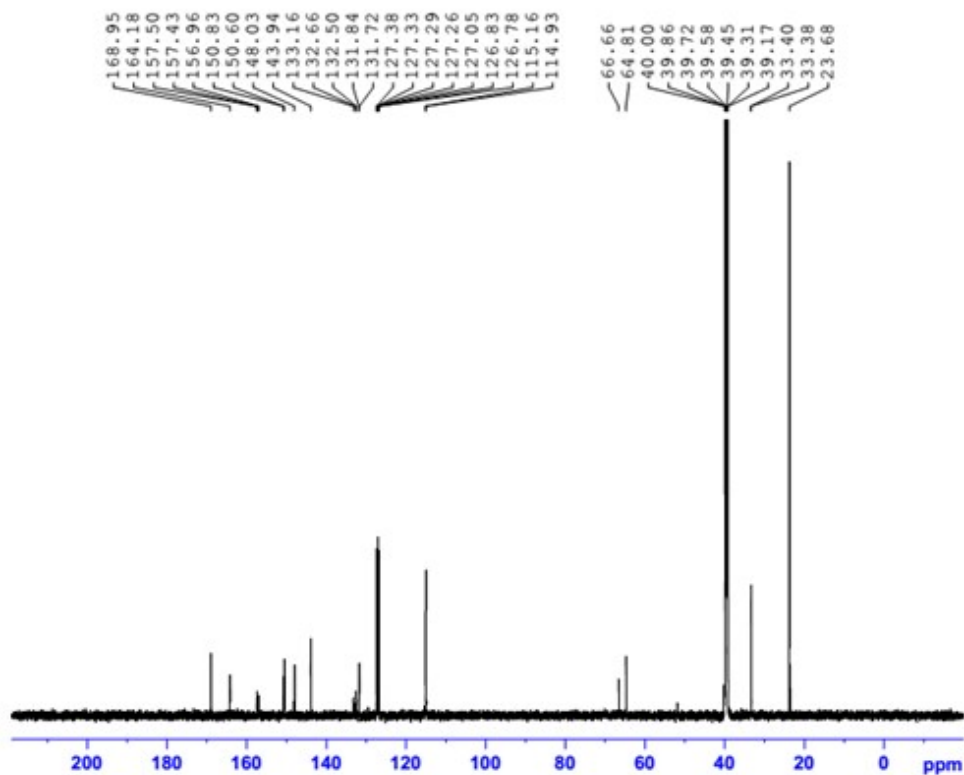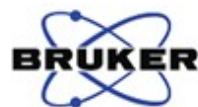

Current Data Parameters  
NAME J8-Jan-2021  
EXPRO 50  
PROCNO 1

F2 - Acquisition Parameters  
Date\_ 20210128  
Time\_ 0.26  
INSTRUM spect  
PROBHD 5 mm PABBO BBO  
PULPROG zgpg30  
TD 65536  
SOLVENT DMSO  
NS 2048  
DS 4  
SWH 36057.491 Kz  
FIDRES 0.550197 Kz  
AQ 0.9087459 sec  
RG 199.2  
IN 11.947 usec  
DE 6.50 usec  
TE 294.6 K  
D1 2.0000000 sec  
D11 0.0100000 sec  
TD0 1

----- CHANNEL f1 -----  
SFO1 150.9229276 MHz  
MPC1 13C  
P1 11.60 usec  
PLM1 83.0000000 W

----- CHANNEL f2 -----  
SFO2 400.1524006 MHz  
MPC2 1H  
CPCPG2 waltz16  
PCPD2 70.00 usec  
PLM2 22.6000038 W  
PLM2 0.51806002 W  
PLM3 0.2874999 W

F2 - Processing parameters  
SI 32768  
SF 150.9079041 MHz  
WDW EM  
SSB 0  
LB 1.00 Kz  
GB 0  
PC 1.40

Figure S56: <sup>13</sup>C NMR OF COMPOUND 4q



|                    |                     |                               |         |                        |                      |
|--------------------|---------------------|-------------------------------|---------|------------------------|----------------------|
| <b>Sample Name</b> | MIM-17              | <b>Position</b>               | Vial 47 | <b>Instrument Name</b> | Instrument 1         |
| <b>User Name</b>   |                     | <b>Inj Vol</b>                | 10      | <b>InjPosition</b>     |                      |
| <b>Sample Type</b> | Sample              | <b>IRM Calibration Status</b> | Success | <b>Data Filename</b>   | MIM-17_NEG_01.d      |
| <b>ACQ Method</b>  | NEG ION METHOD MS.m | <b>Comment</b>                |         | <b>Acquired Time</b>   | 10-Mar-20 5:19:00 PM |

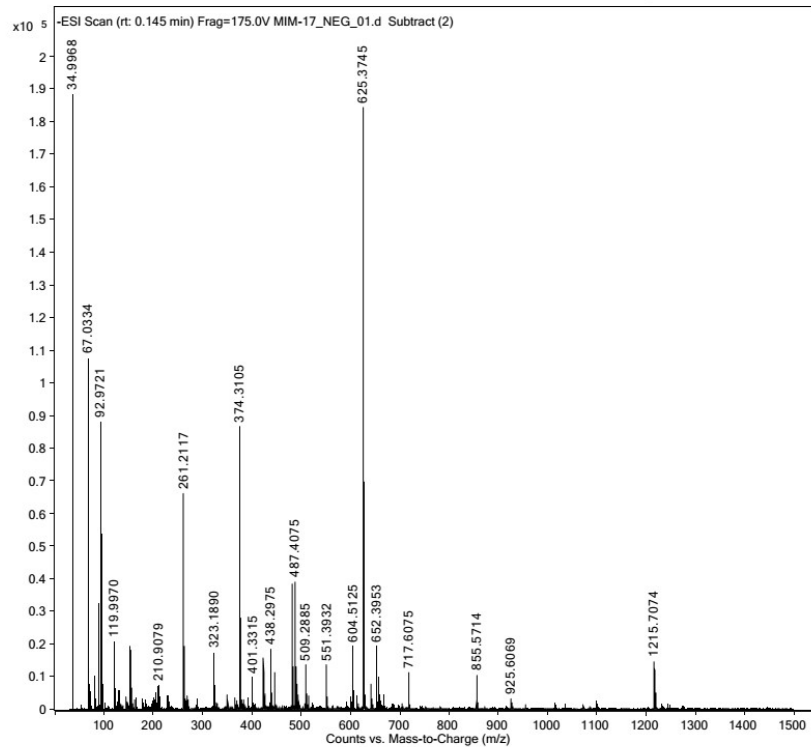

Figure S57: HR-MS OF COMPOUND 4q

Dr. Ajmal/Prof. Ahmed/M1M-18/DMSO  
PROTON

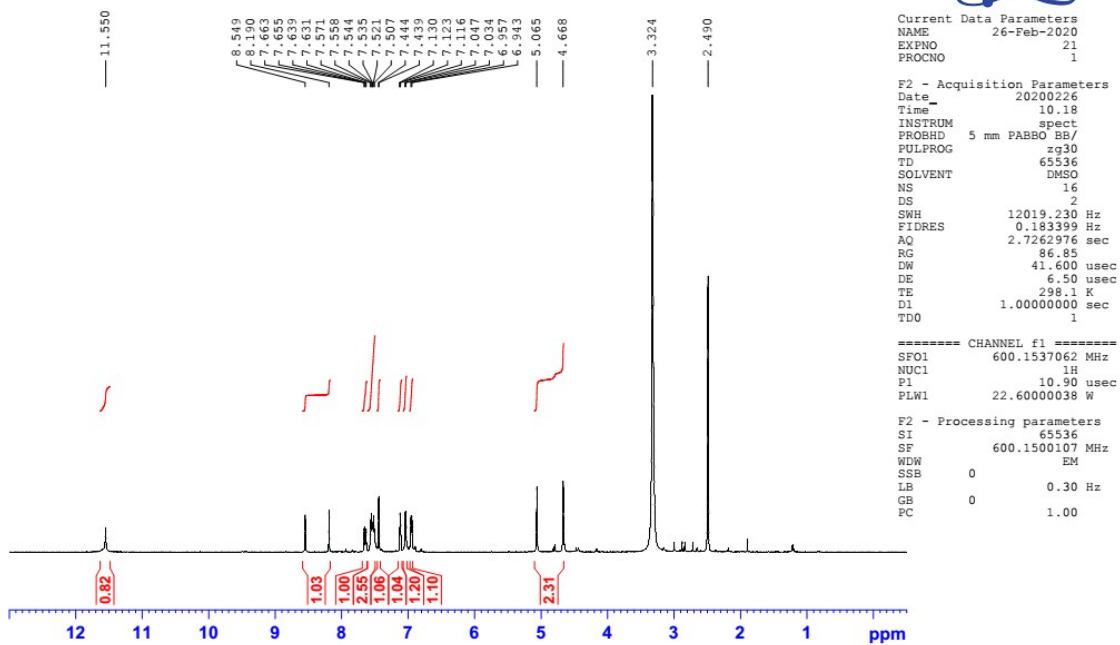

Figure S58: <sup>1</sup>H NMR OF COMPOUND 4r

Dr. Ajmal / MIM18 / DMSO  
C13CPD

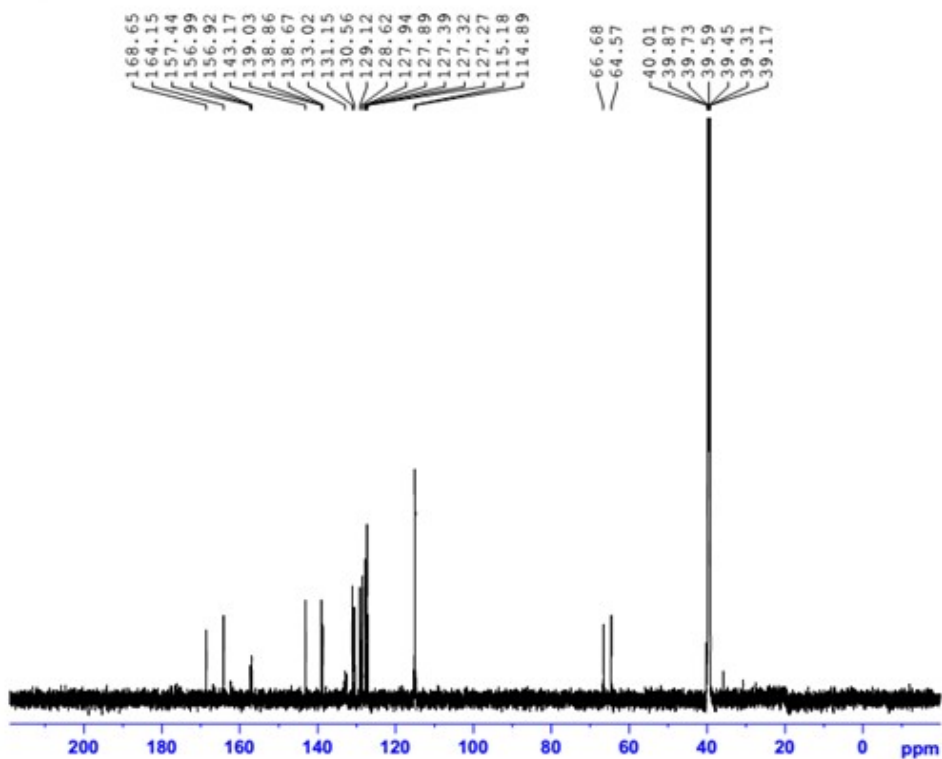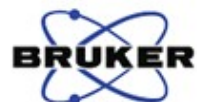

```
Current Data Parameters
NAME      28-Jan-2021
EXPNO    70
PROCNO   1

F2 - Acquisition Parameters
Date_    20210118
Time     14.50
INSTRUM  spect
PROBHD   5 mm PABBO BBI/
PULPROG  zgpg30
TD        65536
SOLVENT  DMSO
NS        2048
DS        4
SWH       36057.491 Hz
FIDRES    0.550197 Hz
AQ         0.9087659 sec
RG         195.2
DW         13.867 usec
DE         6.50 usec
TE         304.2 K
D1         2.0000000 sec
D11        0.0300000 sec
TD0        1

----- CHANNEL f1 -----
SFO1     150.9229276 MHz
NUC1      13C
P1         11.60 usec
PLW1      83.0000000 W

----- CHANNEL f2 -----
SFO2     600.1524056 MHz
NUC2      1H
CPDPRG2  waltz16
PCPD2     70.00 usec
PLW2      22.6000000 W
PLW12     0.52804002 W
PLW13     0.25874999 W

F2 - Processing parameters
SI         32768
SF         150.9079041 MHz
WDW        EM
SSB        0
LB         1.00 Hz
GB         0
PC         1.40
```

Figure S59: <sup>13</sup>C NMR OF COMPOUND 4r

|                    |                     |                               |         |                        |                      |
|--------------------|---------------------|-------------------------------|---------|------------------------|----------------------|
| <b>Sample Name</b> | MIM-18              | <b>Position</b>               | Vial 48 | <b>Instrument Name</b> | Instrument 1         |
| <b>User Name</b>   |                     | <b>Inj Vol</b>                | 10      | <b>InjPosition</b>     |                      |
| <b>Sample Type</b> | Sample              | <b>IRM Calibration Status</b> | Success | <b>Data Filename</b>   | MIM-18_NEG_01.d      |
| <b>ACQ Method</b>  | NEG ION METHOD MS.m | <b>Comment</b>                |         | <b>Acquired Time</b>   | 10-Mar-20 5:26:11 PM |

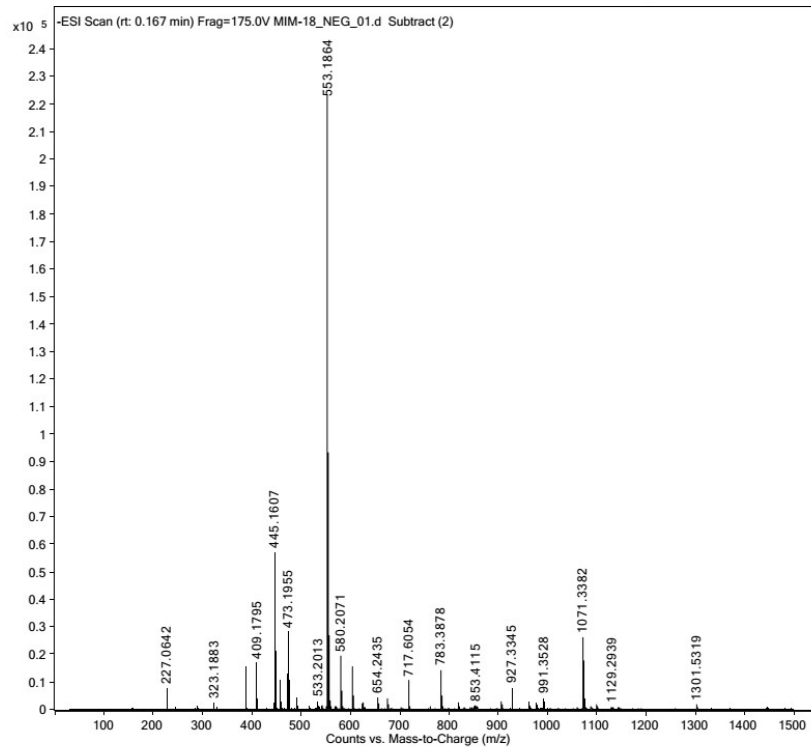

Figure S60: HR-MS OF COMPOUND 4r

Dr. Ajmal/Prof. Ahmed/M1M-19/DMSO  
PROTON

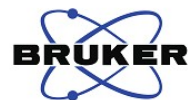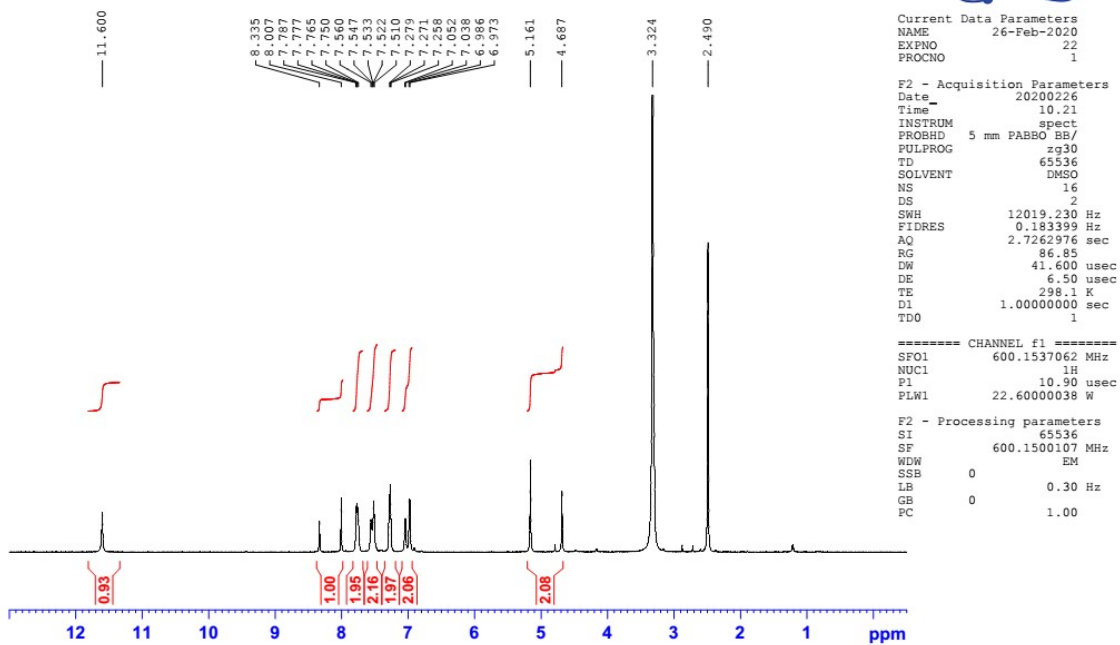

Figure S61:  $^1\text{H}$  NMR OF COMPOUND 4s

Dr. Ajmal / MIM19 / DMSO  
C13CPD

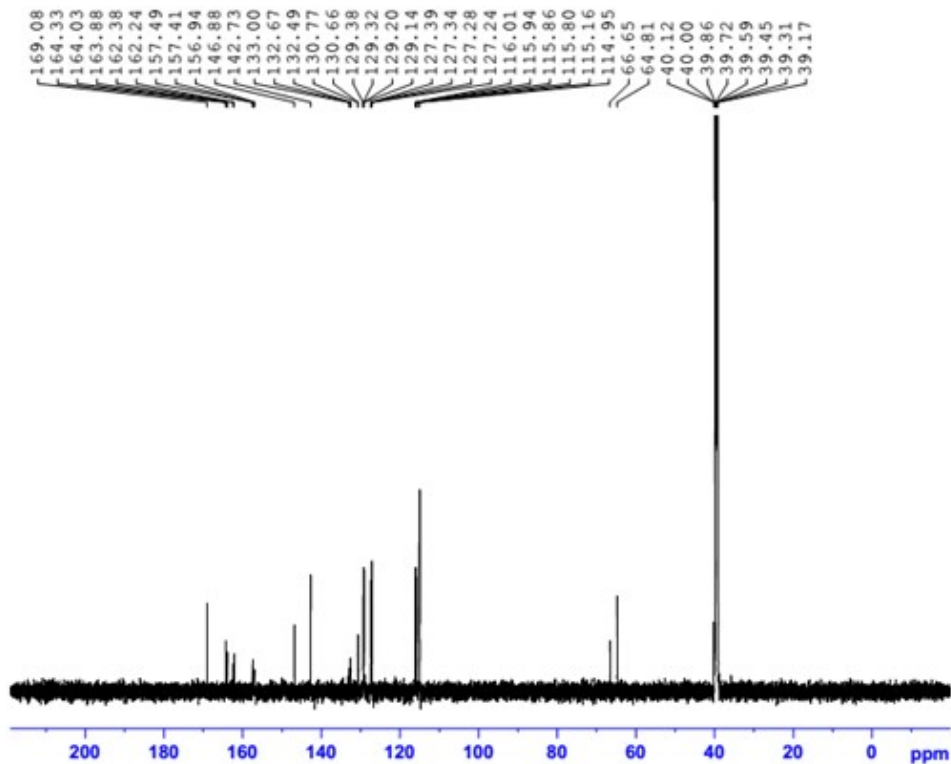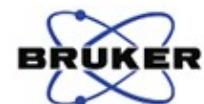

Current Data Parameters  
NAME 28-Jan-2021  
EXNO 78  
PROCNO 1

F2 - Acquisition Parameters  
Date\_ 20210129  
Time 11.32  
INSTNM spect  
PROBHD 5 mm PABBO 507  
PULPROG zgpg30  
TD 65536  
SOLVENT DMSO  
NS 2048  
DS 4  
SWH 34057.491 Hz  
FIDRES 0.550197 Hz  
AQ 0.9087659 sec  
RG 195.2  
DM 13.847 usec  
DE 4.50 usec  
TE 296.4 K  
D1 2.0000000 sec  
D11 0.0300000 sec  
TD0 1

----- CHANNEL f1 -----  
SFO1 150.9229276 MHz  
NUC1 13C  
P1 11.60 usec  
PLW1 83.0000000 W

----- CHANNEL f2 -----  
SFO2 600.1524006 MHz  
NUC2 1H  
CPCPRG[2] waltz16  
PCPD2 70.00 usec  
PLW2 22.4000000 W  
PLW3 0.25874999 W

F2 - Processing parameters  
SI 32768  
SF 150.9079041 MHz  
WEW EM  
SSB 0  
LB 1.00 Hz  
GB 0  
PC 1.40

Figure S62:  $^{13}\text{C}$  NMR OF COMPOUND 4s

|                    |                     |                               |         |                        |                      |
|--------------------|---------------------|-------------------------------|---------|------------------------|----------------------|
| <b>Sample Name</b> | MIM-19              | <b>Position</b>               | Vial 49 | <b>Instrument Name</b> | Instrument 1         |
| <b>User Name</b>   |                     | <b>Inj Vol</b>                | 10      | <b>InjPosition</b>     |                      |
| <b>Sample Type</b> | Sample              | <b>IRM Calibration Status</b> | Success | <b>Data Filename</b>   | MIM-19_NEG_01.d      |
| <b>ACQ Method</b>  | NEG ION METHOD MS.m | <b>Comment</b>                |         | <b>Acquired Time</b>   | 10-Mar-20 5:33:21 PM |

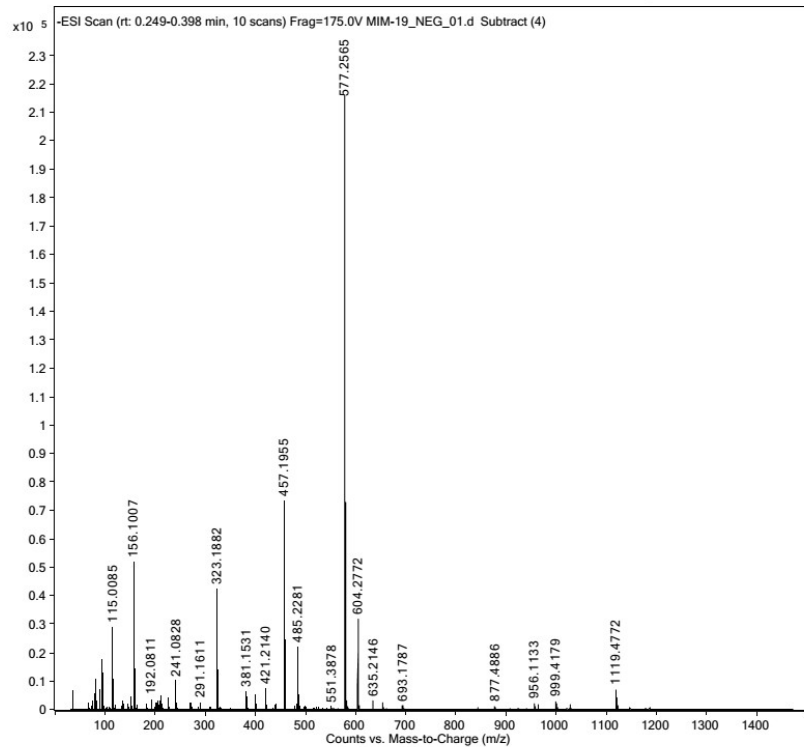

Figure S63: HR-MS OF COMPOUND 4s

Dr. Ajmal/Prof. Ahmed/M1M-20/DMSO  
PROTON

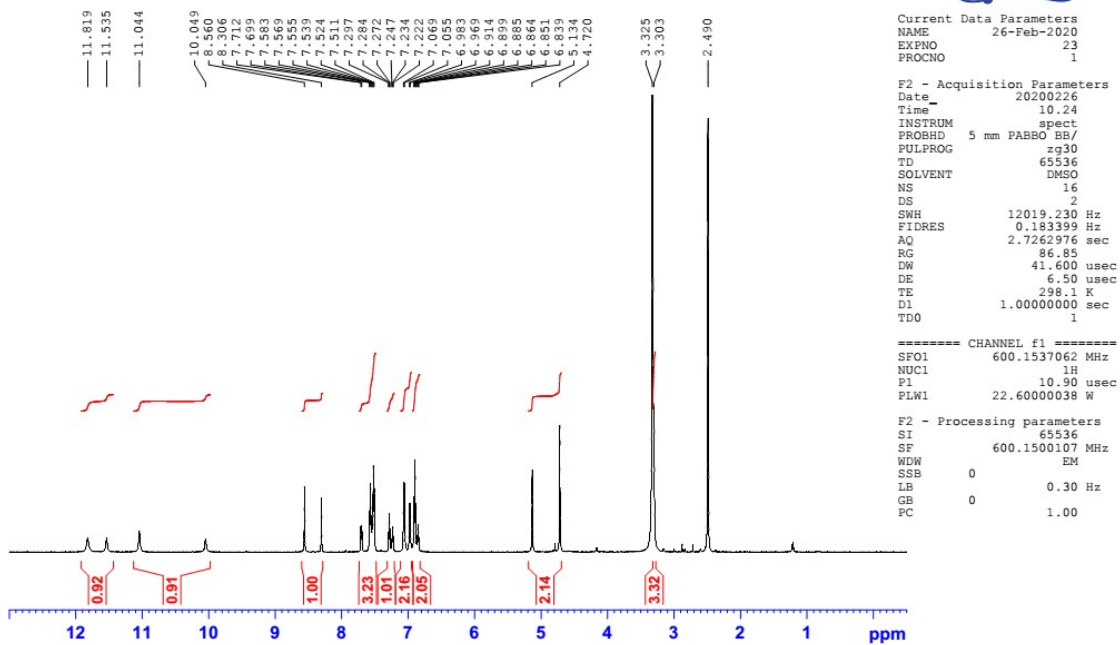

Figure S64:  $^1\text{H}$  NMR OF COMPOUND 4t



Dr. Ajmal / MIM20 / DMSO  
C13CPD

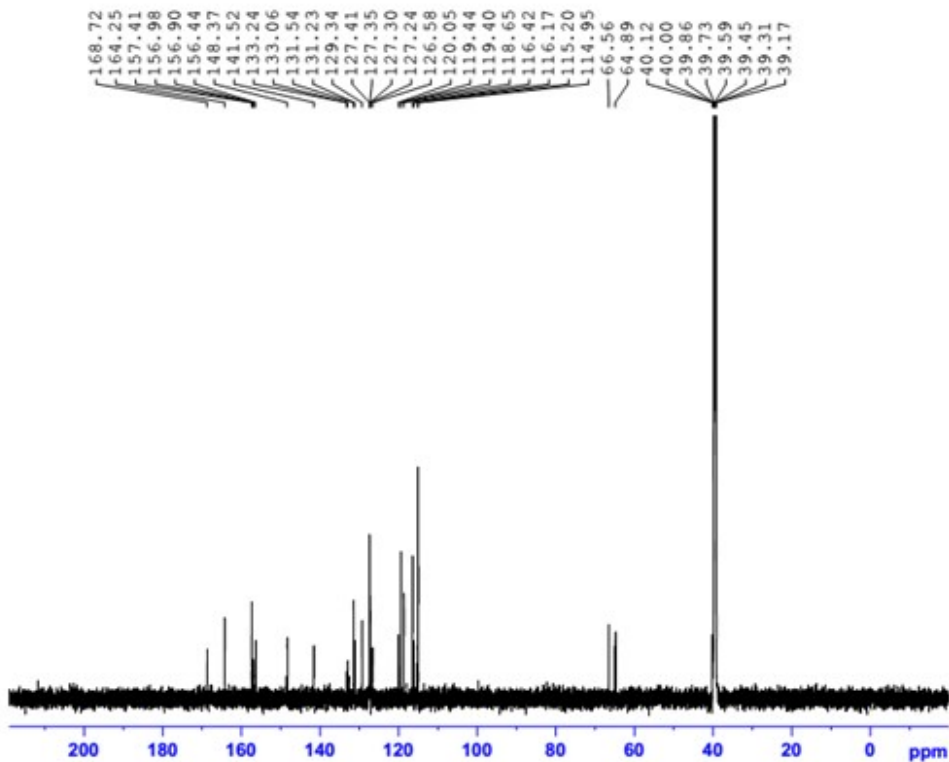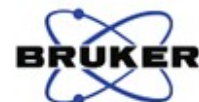

```
Current Data Parameters
NAME      28-Jan-2021
EXPRO    34
PROBHD    1
F2 - Acquisition Parameters
Date_    20210128
Time     18.26
INSTRUM  spect
PROBHD   5 mm PABBO 50/
PULPROG  zgpg30
TD       65536
SOLVENT  DMSO
NS       2048
DS       4
SRR      36057.691 Hz
FIDRES   0.550197 Hz
AQ       0.9087659 sec
RG       195.2
IR       11.847 sec
DE       6.50 sec
TE       294.2 K
D1       2.0000000 sec
d11      0.0300000 sec
TD0      1
----- CHANNEL f1 -----
SFO1    150.9229276 MHz
NUC1     13C
P1       11.60 sec
PLW1     83.00000000 W
----- CHANNEL f2 -----
SFO2    600.1524004 MHz
NUC2     1H
PCPD212  wait:16
PCPD2    70.00 sec
PLW2     22.60000038 W
PLW3     0.25874999 W
-----
F2 - Processing parameters
SI       32768
SF       150.9079041 MHz
WDW      DM
SSB      0
LA       1.00 Hz
GB       0
PC       1.40
```

Figure S65:  $^{13}\text{C}$  NMR OF COMPOUND 4t

|                    |                     |                               |         |                        |                      |
|--------------------|---------------------|-------------------------------|---------|------------------------|----------------------|
| <b>Sample Name</b> | MIM-20              | <b>Position</b>               | Vial 50 | <b>Instrument Name</b> | Instrument 1         |
| <b>User Name</b>   |                     | <b>Inj Vol</b>                | 10      | <b>InjPosition</b>     |                      |
| <b>Sample Type</b> | Sample              | <b>IRM Calibration Status</b> | Success | <b>Data Filename</b>   | MIM-20_NEG_01.d      |
| <b>ACQ Method</b>  | NEG ION METHOD MS.m | <b>Comment</b>                |         | <b>Acquired Time</b>   | 10-Mar-20 5:40:31 PM |

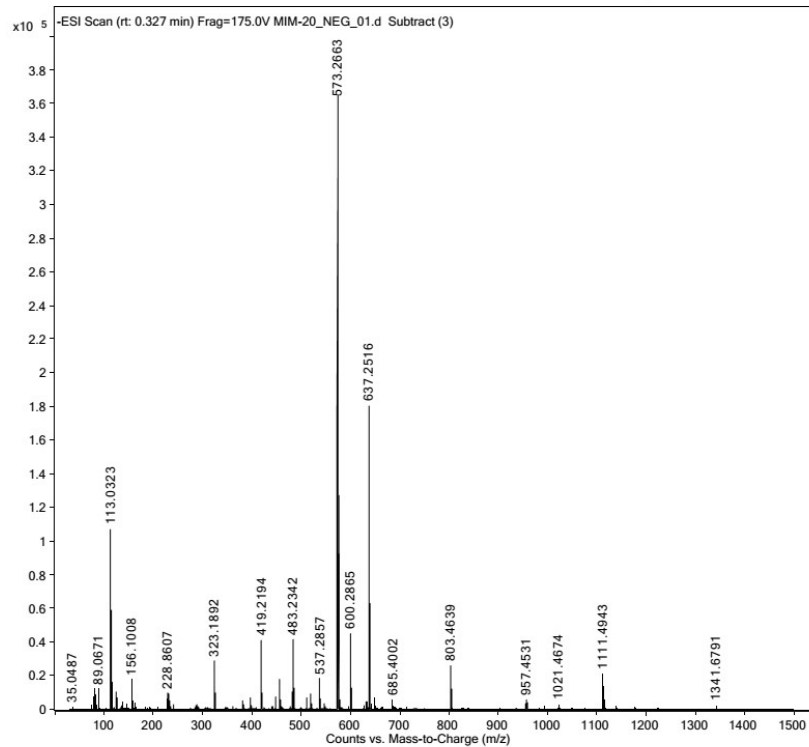

Figure S66: HR-MS OF COMPOUND 4t

Dr. Ajmal/Prof. Ahmed/M1M-21/DMSO  
PROTON

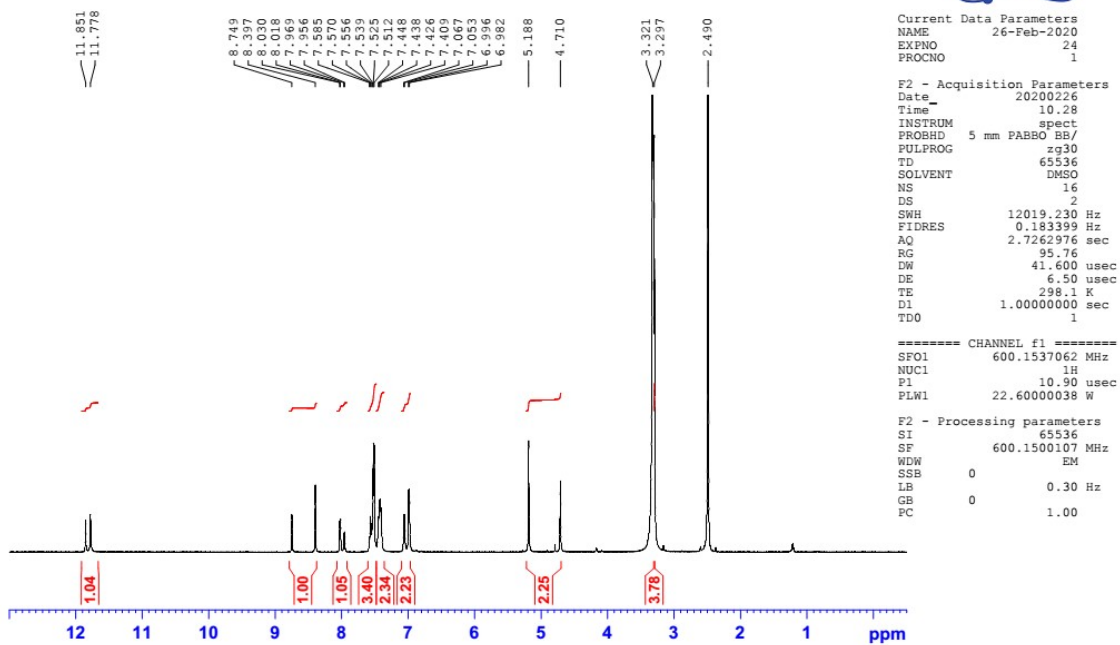

Figure S67:  $^1\text{H}$  NMR OF COMPOUND 4u

Dr. Ajmal / MIM21 / DMSO  
C13CPD

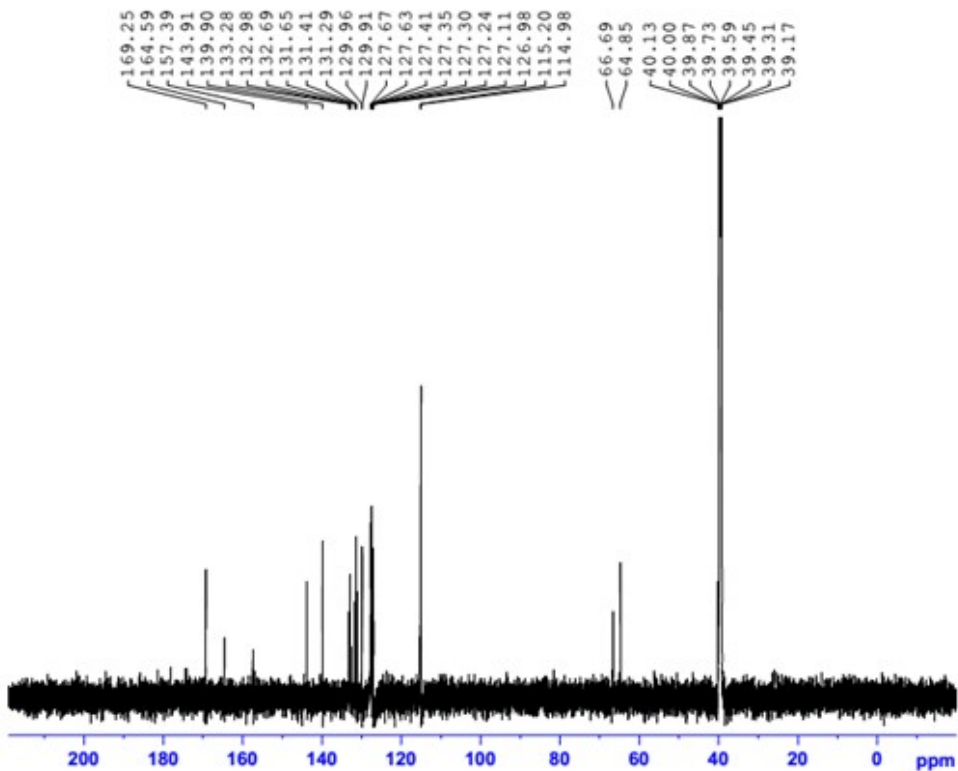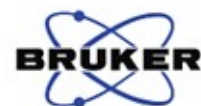

Current Data Parameters  
NAME 28-Jan-2021  
EXNO 66  
PROCNO 1

F2 - Acquisition Parameters  
Date\_ 20210128  
Time 11.14  
INSTRUM spect  
PROBHD 5 mm DABBO 50/  
PULPROG zgpg30  
TD 65536  
SOLVENT DMSO  
NS 2048  
DS 4  
SWH 34057.491 Hz  
FIDRES 0.550197 Hz  
AQ 0.9097659 sec  
RG 199.2  
DM 13.847 usec  
DE 6.50 usec  
TE 296.4 K  
D1 2.0000000 sec  
D11 0.0300000 sec  
TD0 1

----- CHANNEL f1 -----  
SF01 150.9229276 MHz  
NUC1 13C  
P1 11.60 usec  
PLM1 83.0000000 W

----- CHANNEL f2 -----  
SF02 600.1524006 MHz  
NUC2 1H  
CPOPRG[2] waltz16  
PCPD2 70.00 usec  
PLM2 22.6000000 W  
PLM3 0.5200000 W  
PLM3 0.25874999 W

F2 - Processing parameters  
SI 32768  
SF 150.9079041 MHz  
WDW EM  
SSB 0  
LB 1.00 Hz  
GB 0  
PC 1.40

Figure S68: <sup>13</sup>C NMR OF COMPOUND 4u

|                    |                     |                               |         |                        |                      |
|--------------------|---------------------|-------------------------------|---------|------------------------|----------------------|
| <b>Sample Name</b> | MIM-21              | <b>Position</b>               | Vial 51 | <b>Instrument Name</b> | Instrument 1         |
| <b>User Name</b>   |                     | <b>Inj Vol</b>                | 10      | <b>InjPosition</b>     |                      |
| <b>Sample Type</b> | Sample              | <b>IRM Calibration Status</b> | Success | <b>Data Filename</b>   | MIM-21_NEG_01.d      |
| <b>ACQ Method</b>  | NEG ION METHOD MS.m | <b>Comment</b>                |         | <b>Acquired Time</b>   | 10-Mar-20 5:47:39 PM |

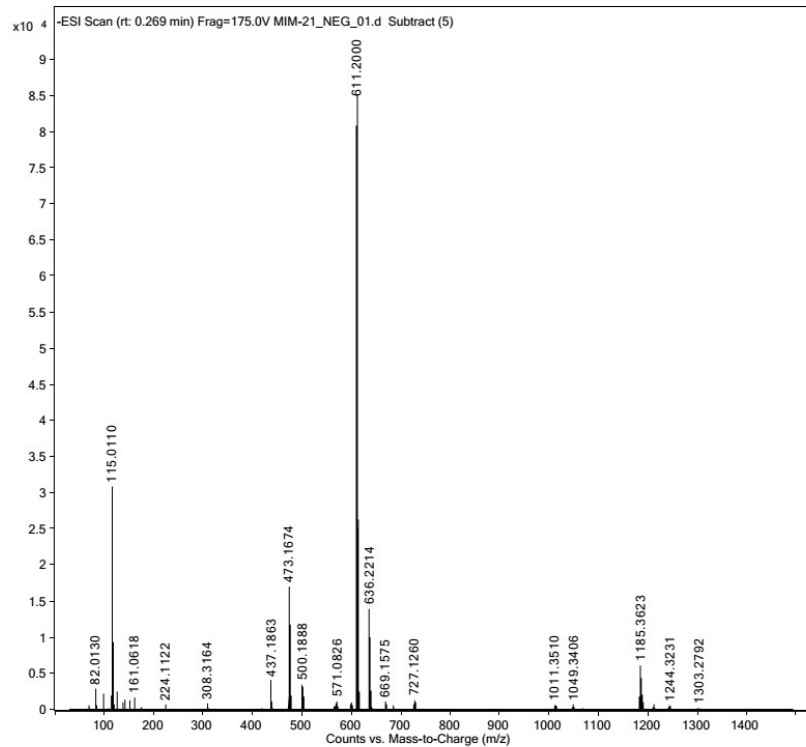

Figure S69: HR-MS OF COMPOUND 4u

Dr. Ajmal/Prof. Ahmed/M1M-22/DMSO  
PROTON

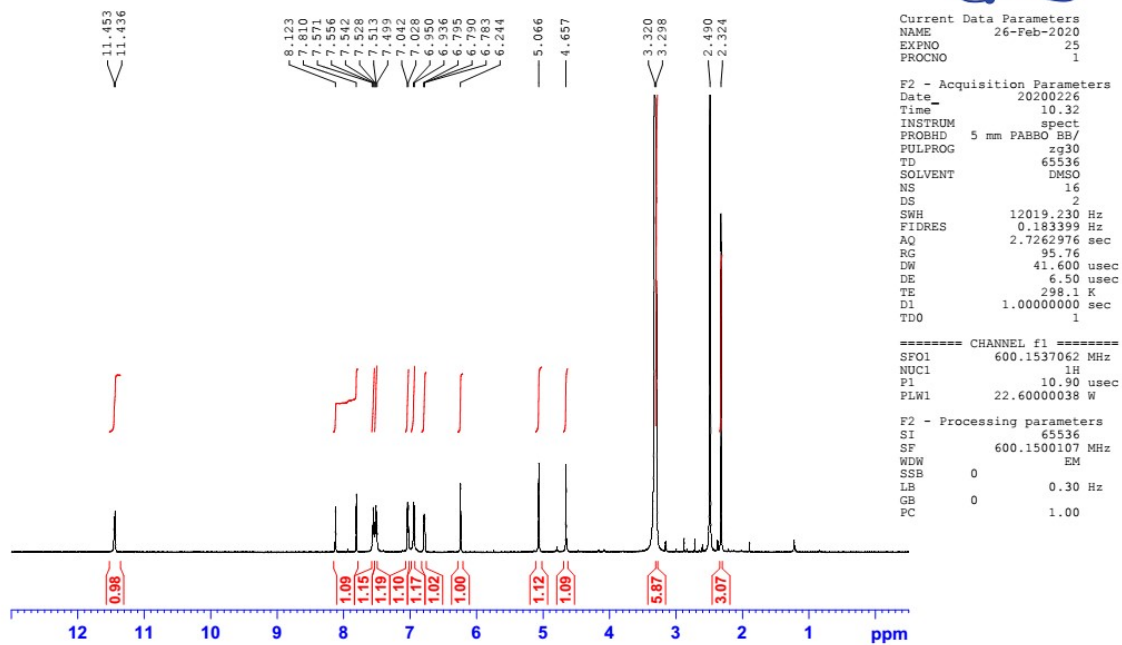

Figure S70:  $^1\text{H}$  NMR OF COMPOUND 4v

Dr. Ajmal / MIM22 / DMSO  
C13CPD

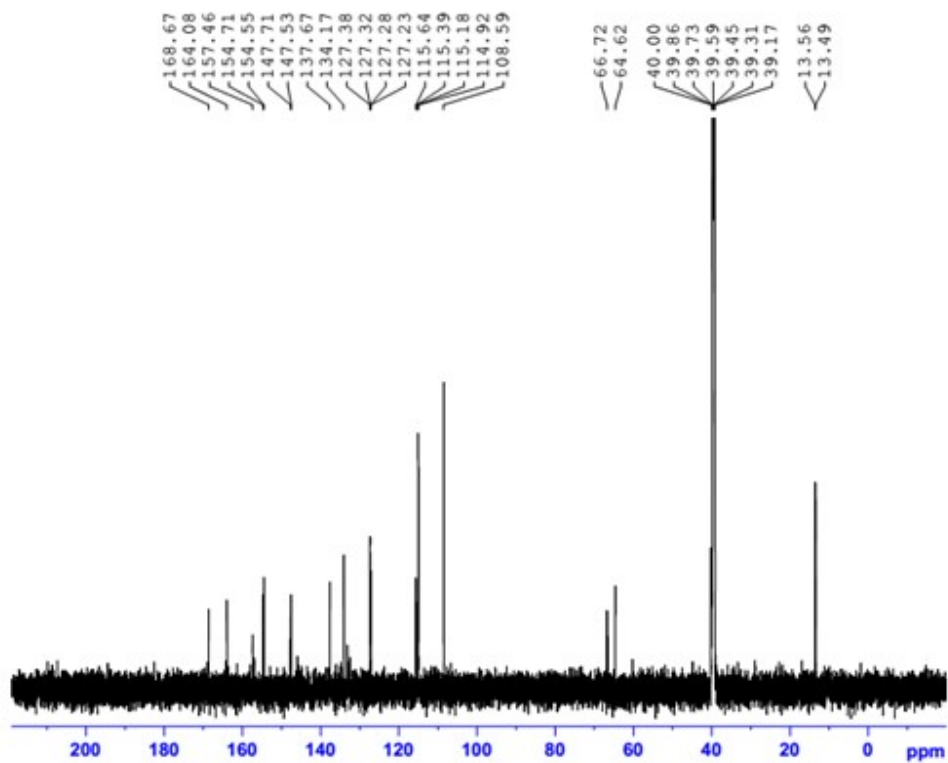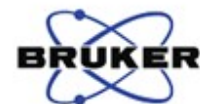

Current Data Parameters  
NAME 28-Jun-2021  
EXPNO 62  
PROCNO 1

F2 - Acquisition Parameters  
Date\_ 20210128  
Time 7.38  
INSTRUM spect  
PROBHD 5 mm PABBO BB/  
PULPROG zgpg30  
TD 65534  
SOLVENT DMSO  
NS 2048  
DS 4  
SWH 36057.491 Hz  
FIDRES 0.550197 Hz  
AQ 0.5087459 sec  
RG 195.2  
DM 13.867 usec  
DE 6.50 usec  
TE 298.3 K  
D1 2.00000000 sec  
D11 0.03000000 sec  
TD0 1

----- CHANNEL f1 -----  
SFO1 150.923276 MHz  
NUC1 13C  
P1 11.60 usec  
PLM1 83.00000000 W

----- CHANNEL f2 -----  
SFO2 600.1524006 MHz  
NUC2 1H  
CPOPRG12 waltz16  
PCPD2 70.00 usec  
PLM2 22.60000038 W  
PLM12 0.52804002 W  
PLM13 0.35874999 W

F2 - Processing parameters  
SI 32768  
SF 150.9079041 MHz  
WDW EM  
SSB 0  
LB 1.00 Hz  
GB 0  
PC 1.40

Figure S71: <sup>13</sup>C NMR OF COMPOUND 4v

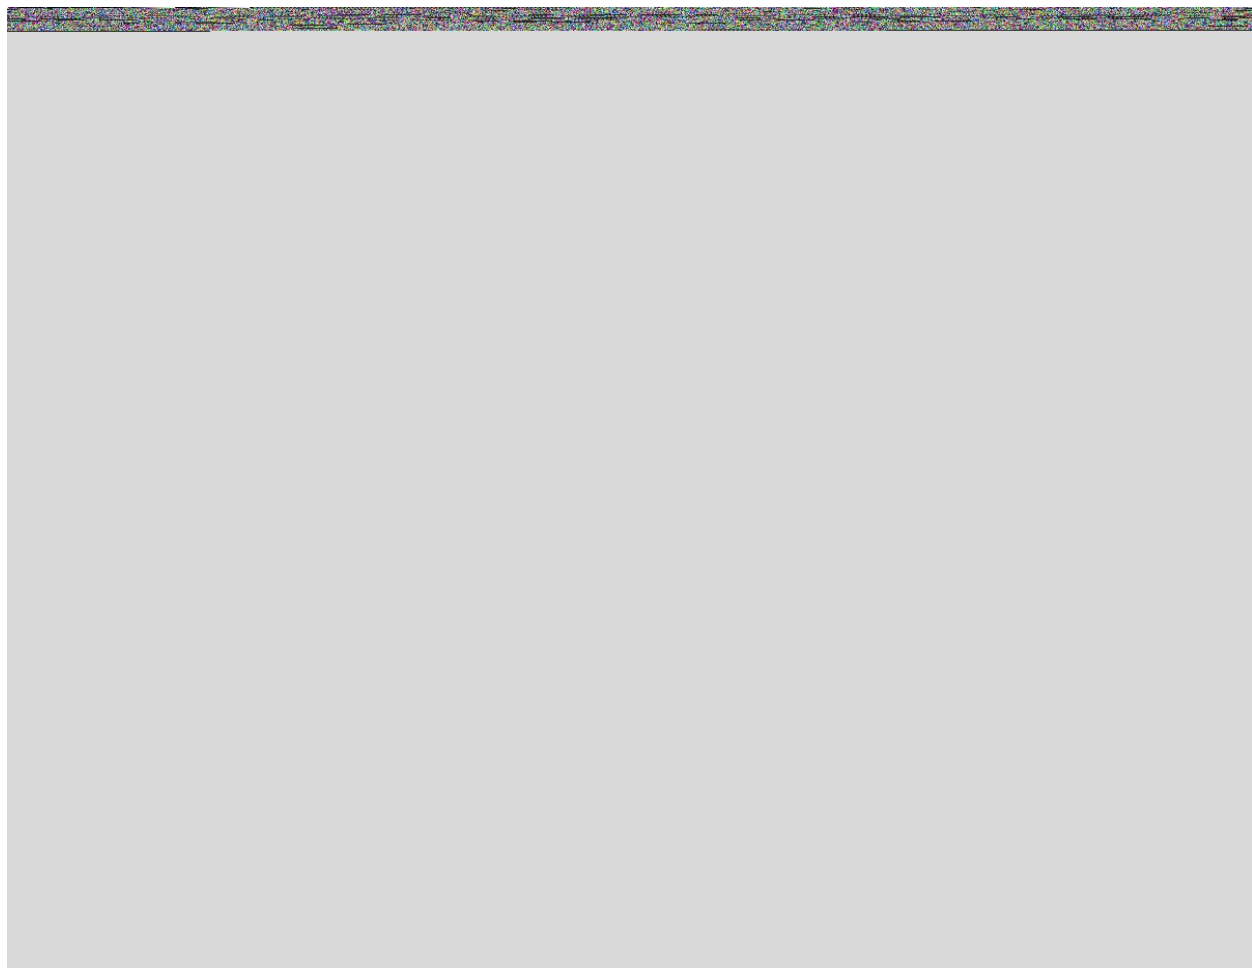

Figure S72: HR-MS OF COMPOUND 4v



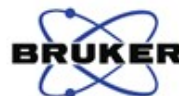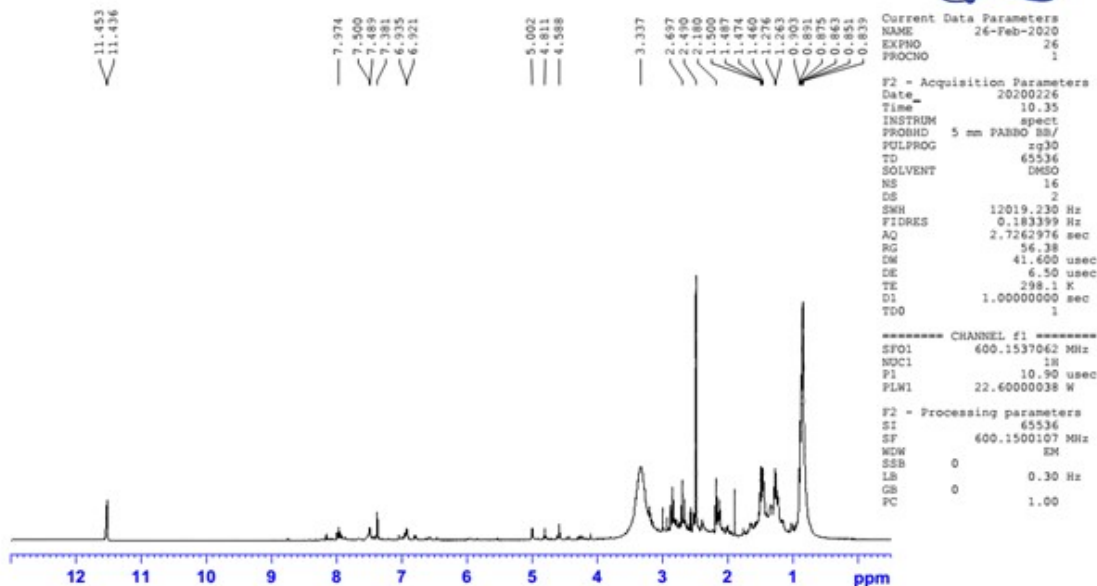

Figure S73:  $^1\text{H}$  NMR OF COMPOUND 4w

Dr. Ajmal / MIN23 / DMSO  
C13CPD

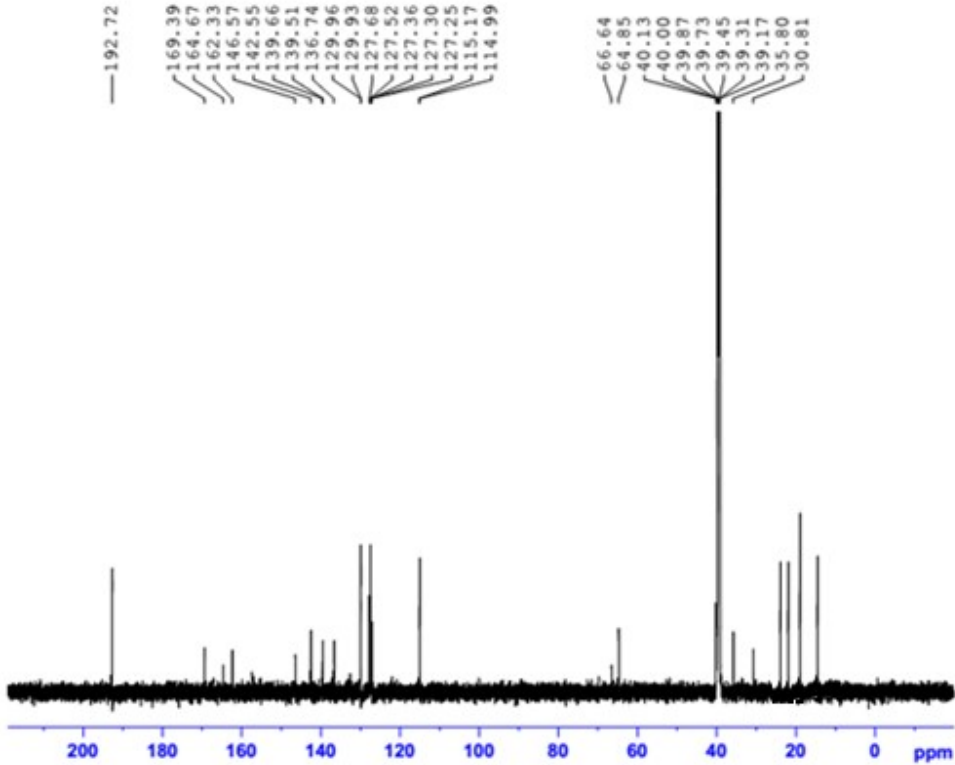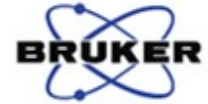

Current Date Parameters  
NAME 28-Jan-2021  
EXFNO 2  
PROCNO 1

F2 - Acquisition Parameters  
Date\_ 20210128  
Time 23.46  
INSTRUM spect  
PROBHD 5 mm PABBO 1H/  
PULPROG zgpg30  
TD 65536  
SOLVENT DMSO  
NS 4096  
DS 4  
SWH 34057.491 Hz  
FIDRES 0.180197 Hz  
AQ 0.9087659 sec  
RG 199.2  
SW 13.645 used  
DE 6.50 used  
TE 296.6 K  
D1 2.0000000 sec  
D11 0.0300000 sec  
TD0 1

==== CHANNEL F1 =====  
SFO1 150.9229276 MHz  
NUC1 13C  
P1 11.60 used  
PLM1 83.0000000 W

==== CHANNEL F2 =====  
SFO2 400.1524006 MHz  
NUC2 1H  
CFOFREQ2 waltz16  
PCPO2 70.00 used  
PLM2 22.6000000 W  
PLM3 0.5000000 W  
PLM3 0.25874999 W

F2 - Processing parameters  
SI 32768  
SF 150.9079041 MHz  
WDW EM  
SSB 0  
LB 1.00 Hz  
GB 0  
PC 1.40

Figure S74: <sup>13</sup>C NMR OF COMPOUND 4w

|                    |                     |                               |         |                        |                      |
|--------------------|---------------------|-------------------------------|---------|------------------------|----------------------|
| <b>Sample Name</b> | MIM-15              | <b>Position</b>               | Vial 45 | <b>Instrument Name</b> | Instrument 1         |
| <b>User Name</b>   |                     | <b>Inj Vol</b>                | 10      | <b>InjPosition</b>     |                      |
| <b>Sample Type</b> | Sample              | <b>IRM Calibration Status</b> | Success | <b>Data Filename</b>   | MIM-15_NEG_01.d      |
| <b>ACQ Method</b>  | NEG ION METHOD MS.m | <b>Comment</b>                |         | <b>Acquired Time</b>   | 10-Mar-20 5:04:41 PM |

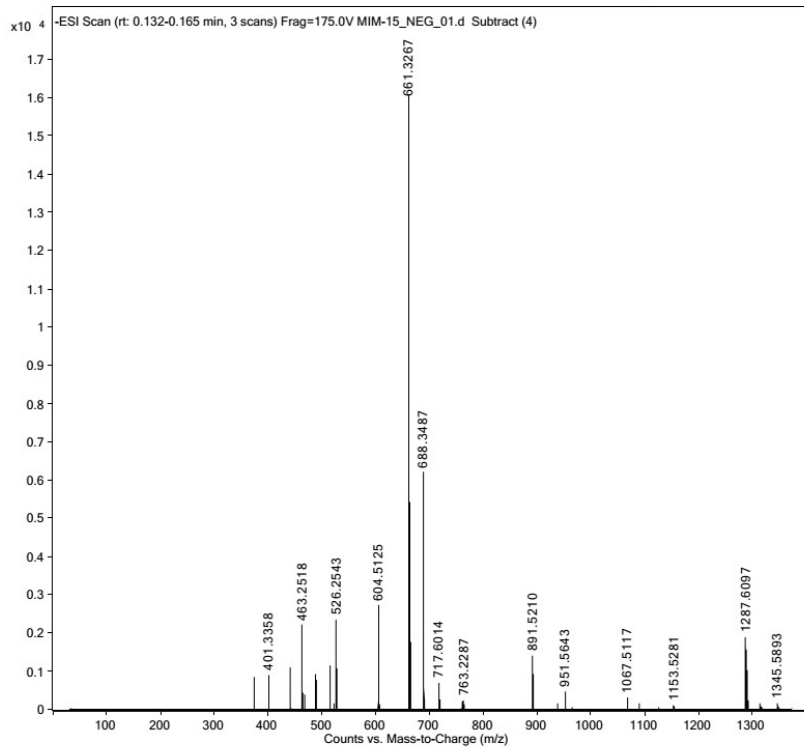

Figure S75: HR-MS OF COMPOUND 4w

Dr. Ajmal/Prof. Ahmed/M1M-24/DMSO  
PROTON

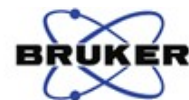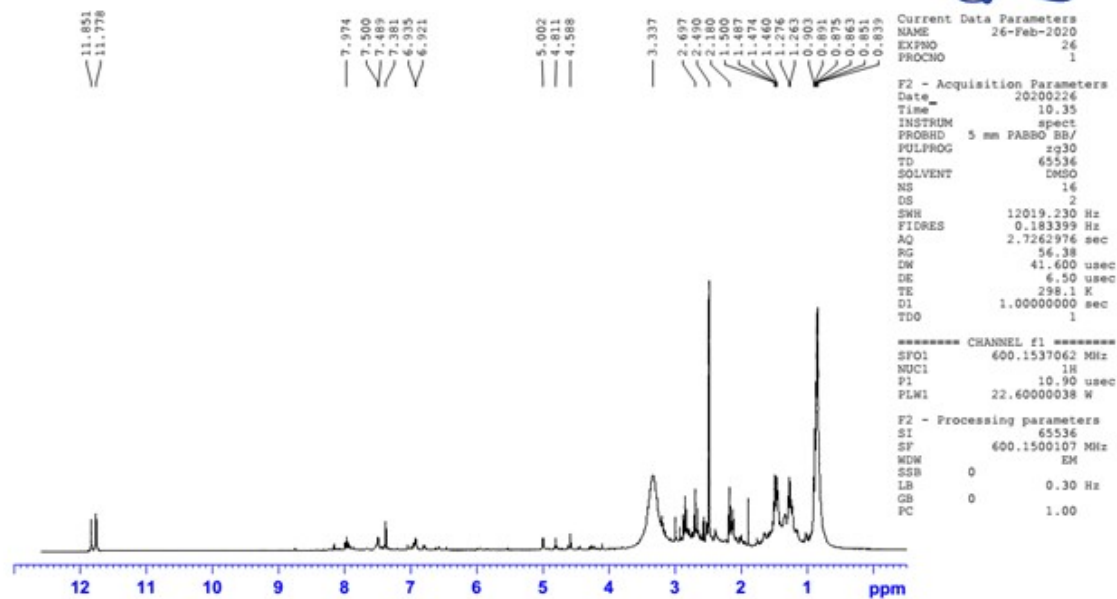

Figure S76:  $^1\text{H}$  NMR OF COMPOUND 4x

Dr. Ajmal / MIM24 / DMSO  
C13CPD

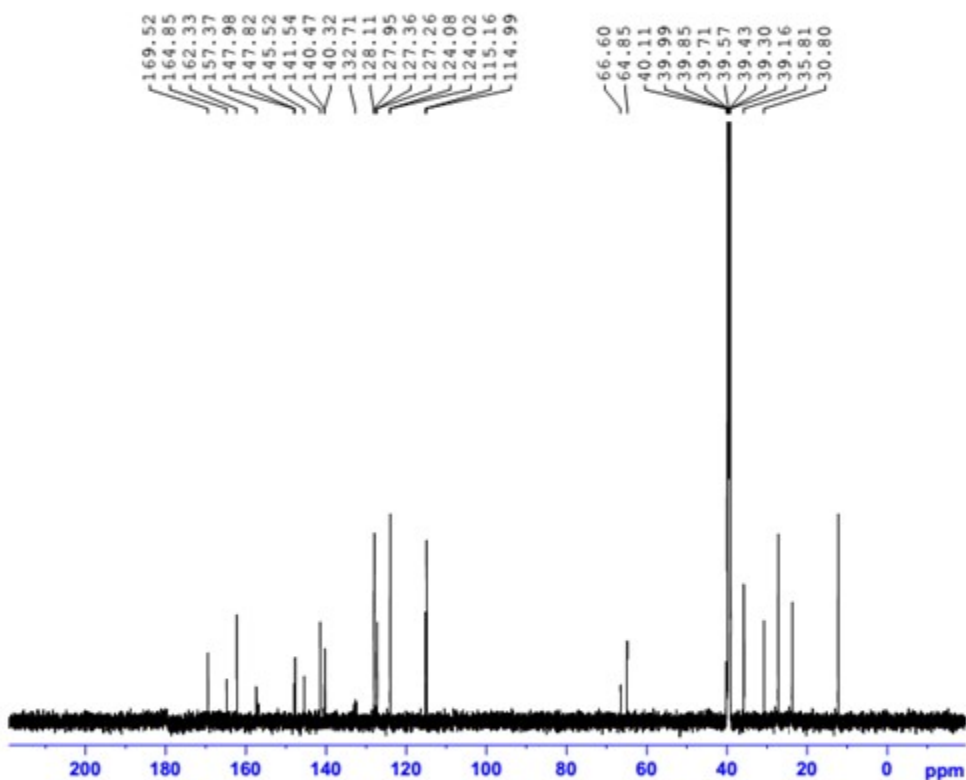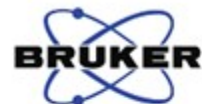

```
Current Data Parameters
NAME      25-Jan-2011
EXPNO    20
PROCNO    1

F2 = Acquisition Parameters
Date_     20110125
Time      22.23
INSTRUM   spect
PROBHD    5 mm PABBO BB/
PULPROG   zgpg30
TD         65536
SOLVENT   DMSO
NS         2048
DS         4
SWH        36057.491 Hz
FIDRES     0.550197 Hz
AQ         0.9087459 sec
RG         195.2
DM         13.867 usec
DE         6.50 usec
TE         296.6 K
D1         2.0000000 sec
d11        0.0100000 sec
TDO        1

----- CHANNEL f1 -----
SFO1      150.922976 MHz
NUC1       13C
P1         11.60 usec
PLM1       83.0000000 W

----- CHANNEL f2 -----
SFO2      400.1524006 MHz
NUC2       1H
CPOPRG[2] waltz16
PCPD1      70.00 usec
PLM2       22.6000000 W
PLM12      0.52806002 W
PLM13      0.25874999 W

F2 = Processing parameters
SI         32768
SF         150.9079041 MHz
WDW        EM
SSB        0
LA         1.00 Hz
GB         0
PC         1.40
```

Figure S77:  $^{13}\text{C}$  NMR OF COMPOUND 4x

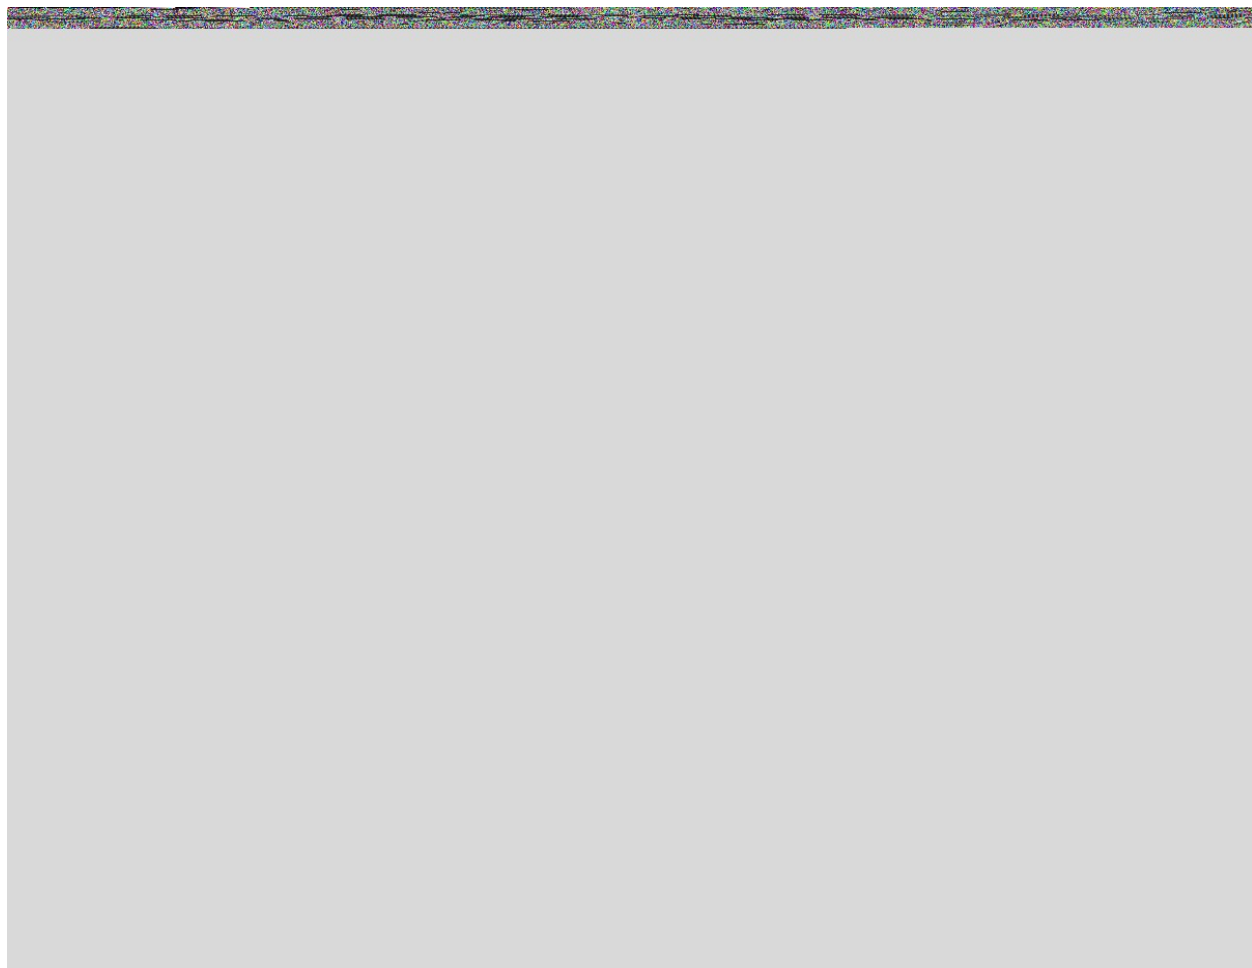

Figure S78: HR-MS OF COMPOUND 4x

Dr. Ajmal/Prof. Ahmed/M1M-25/DMSO  
PROTON

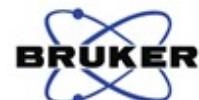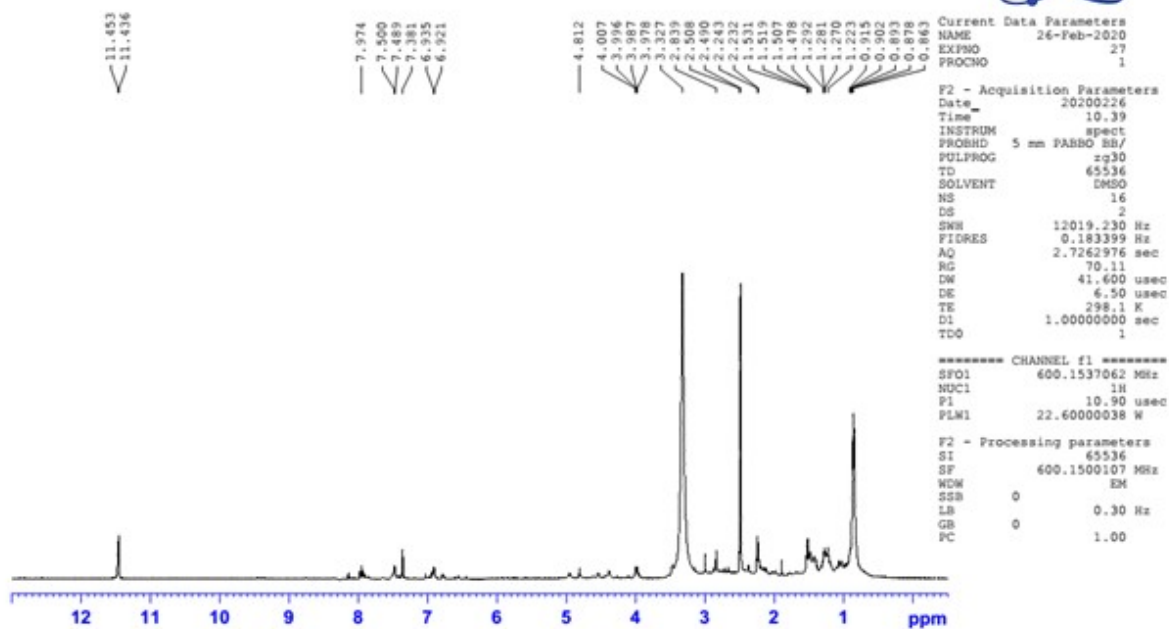

Figure S79:  $^1\text{H}$  NMR OF COMPOUND 4y

Dr. Ajmal / MIM25 / DMSO  
C13CPD

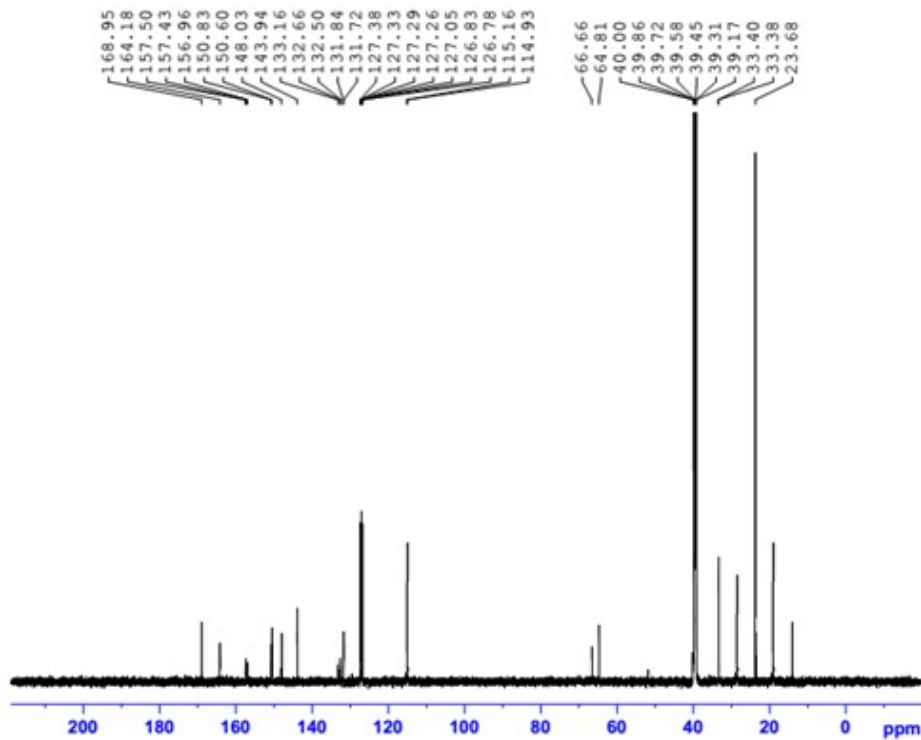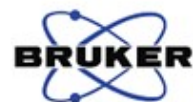

```
Current Data Parameters
NAME      28-Jun-2021
EXPNO    50
PROCNO    1

F2 - Acquisition Parameters
Date_     20210128
Time      0.24
INSTRUM   spect
PROBHD    5 mm PABBO BB/
PULPROG   zgpg30
TD        65536
SOLVENT   DMSO
NS        2048
DS        4
SWH        34057.691 Hz
FIDRES    0.550197 Hz
AQ         0.3087459 sec
RG         195.2
DE         13.867 usec
TE         296.4 K
D1         2.0000000 sec
D11        0.0300000 sec
TD0        1

----- CHANNEL f1 -----
SF01      150.9229276 MHz
NUC1       13C
P1         11.60 usec
PLW1       83.0000000 W

----- CHANNEL f2 -----
SF02      600.1524006 MHz
NUC2       1H
CPCORR[2]  wait:16
PCPD2     70.00 usec
PLW2     22.6000000 W
PLW12     0.52806002 W
PLW13     0.25874999 W

F2 - Processing parameters
SI         32768
SF         150.9079041 MHz
WDW        EM
SSB        0
GB         0
PC         1.40
```

Figure S80:  $^{13}\text{C}$  NMR OF COMPOUND 4y



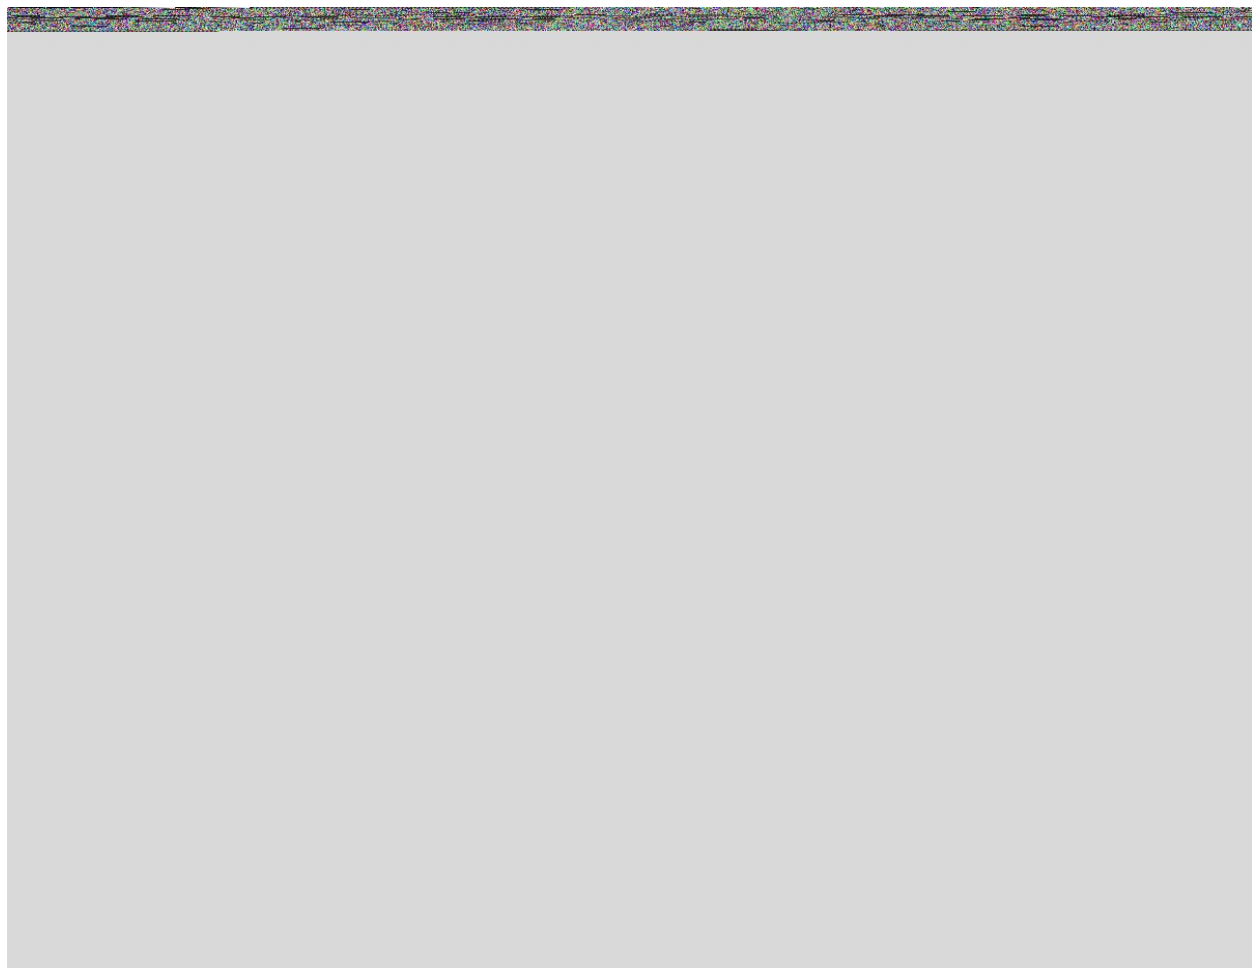

Figure S81: HR-MS OF COMPOUND 4y

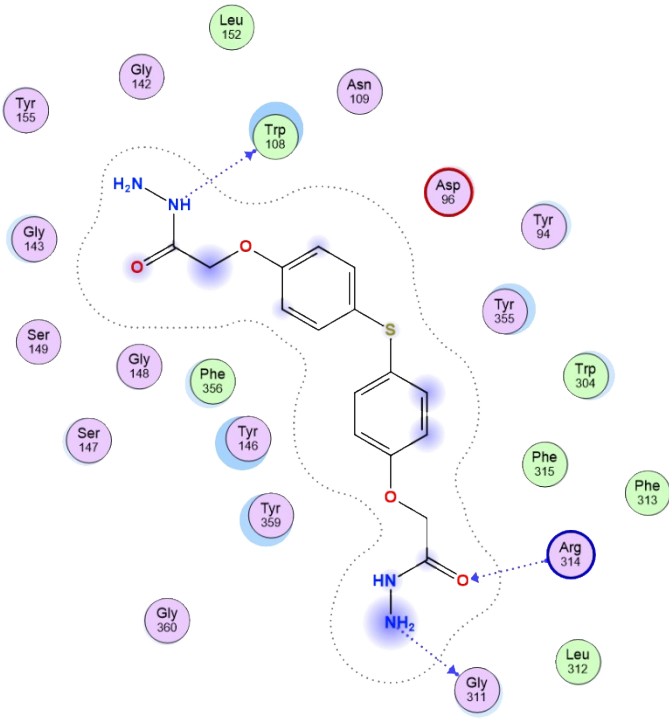

SM3

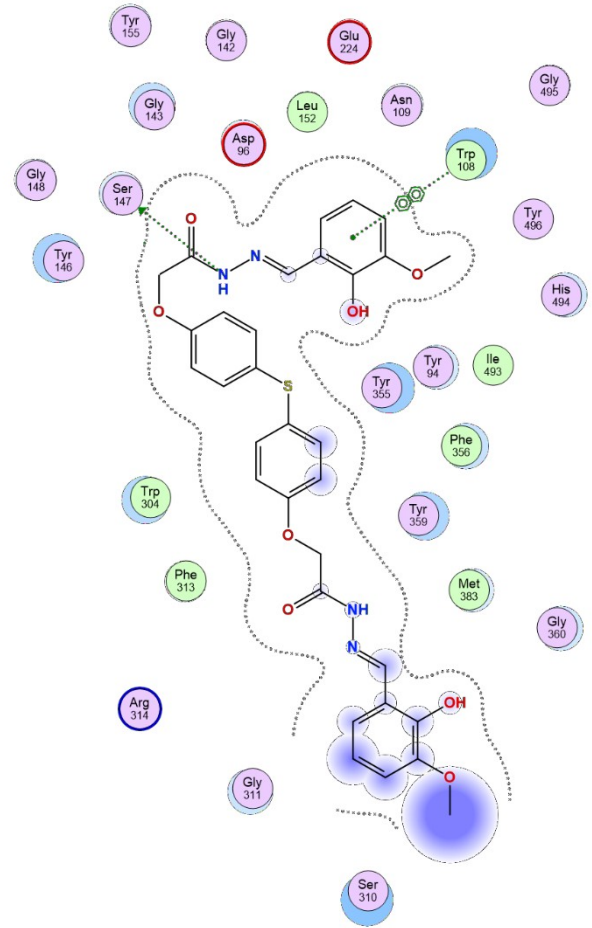

4h

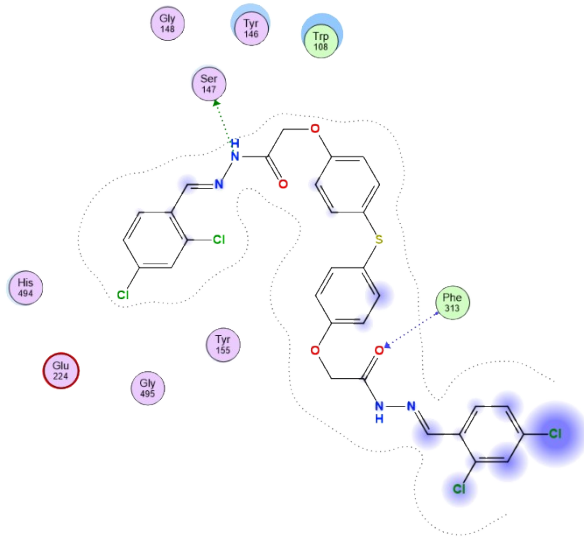

4k

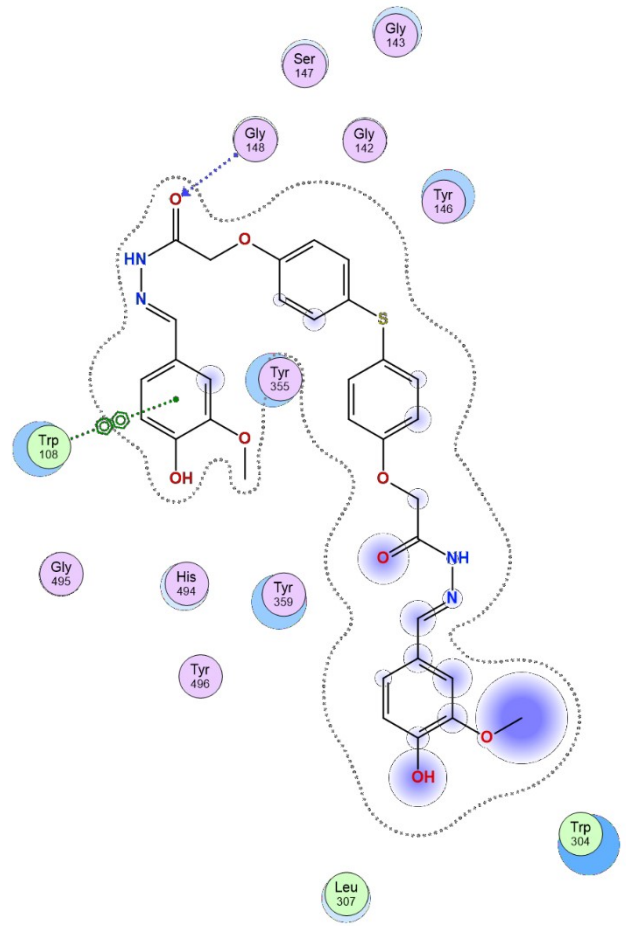

4i



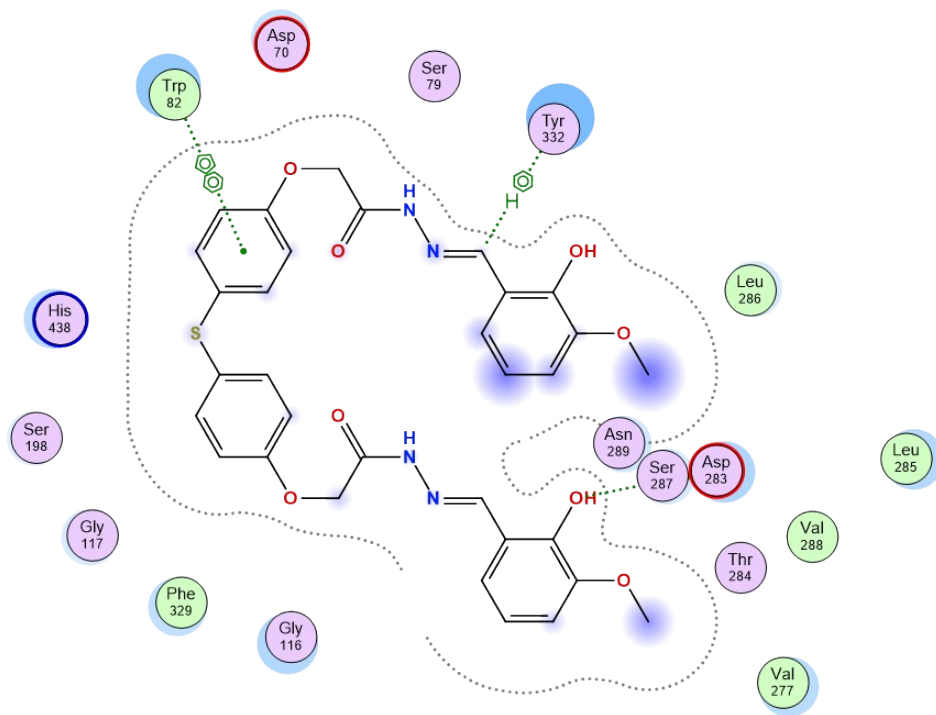

**4h**

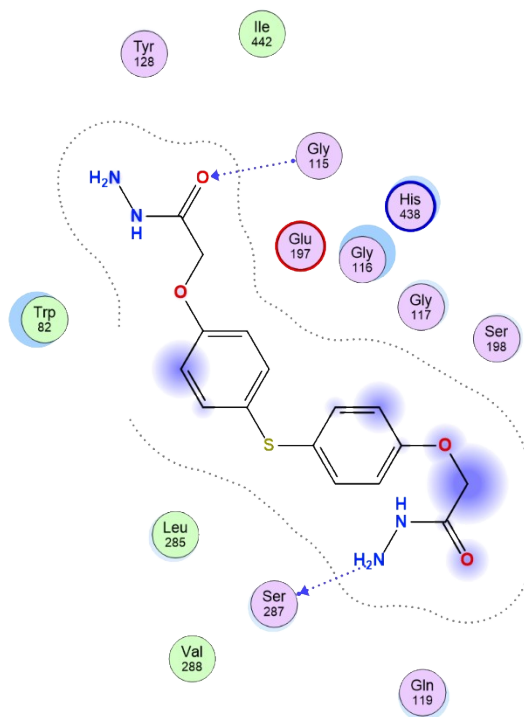

**SM3**

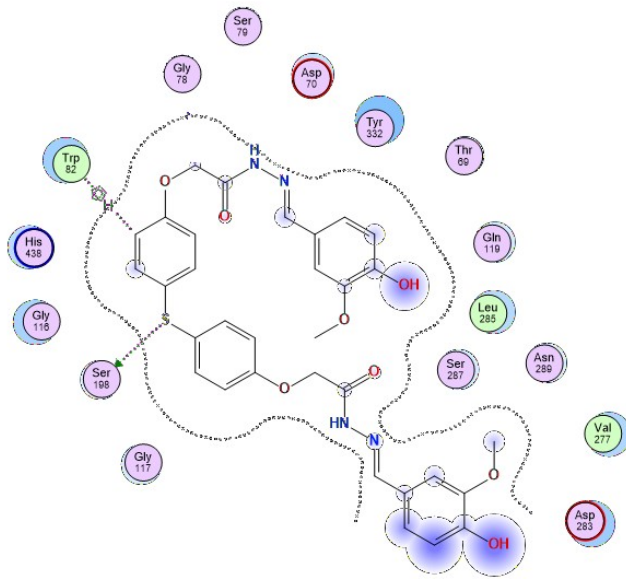

4i

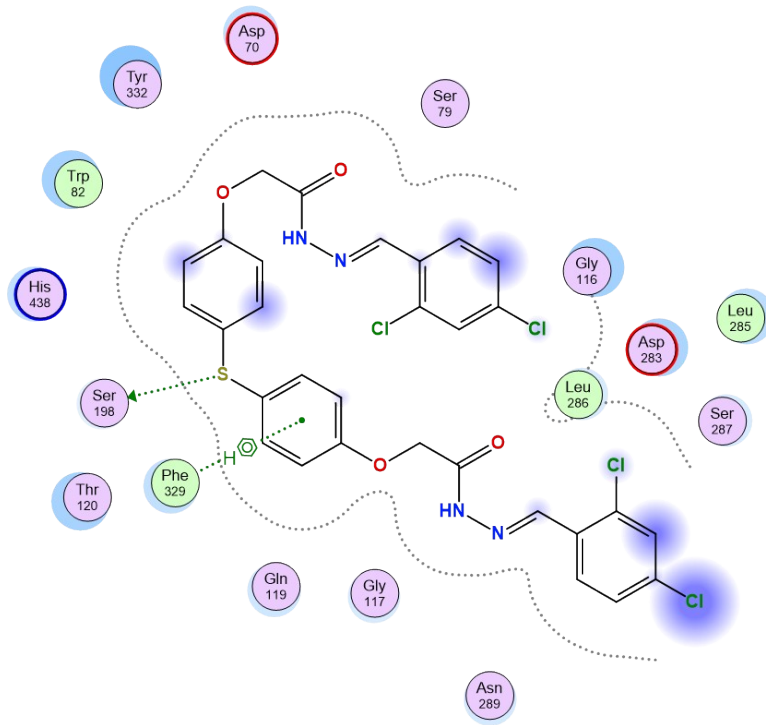

4k

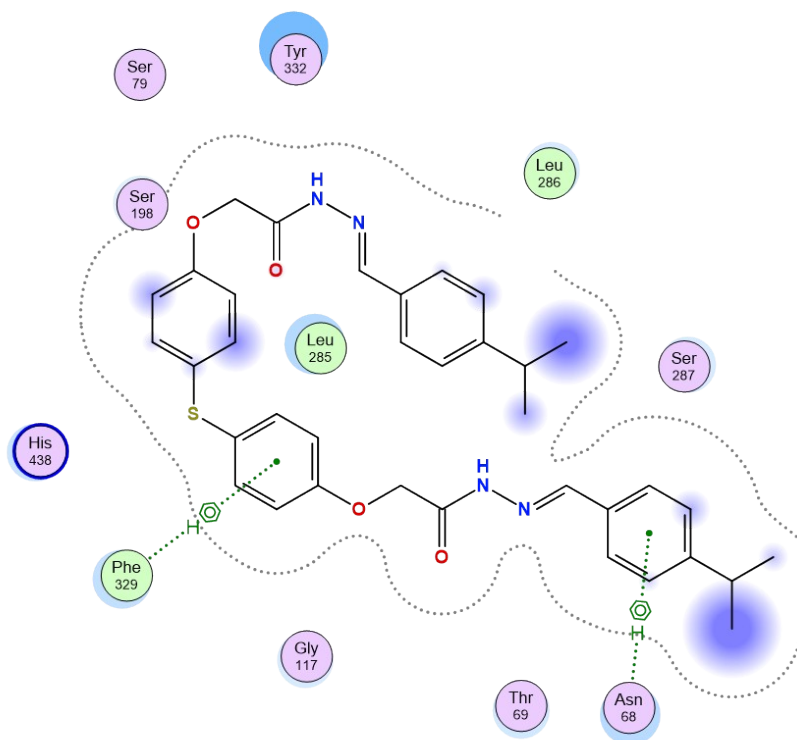

4q

Figure S83. 2D interactions of docked compounds with the active site residues of BuChE
